# Supplementary material for: Diagnostic Accuracy of Blood-based Biomarkers for Pancreatic Cancer: A Systematic Review and Meta-analysis
Source: Cancer Res Commun. 2022 Oct 20;2(10):1229–43. doi: 10.1158/2767-9764.CRC-22-0190 (PMC10035398; doi:10.1158/2767-9764.CRC-22-0190)
Supplement: Supplementary Material S7 — Complete extracted dataset [file crc-22-0190-s07.xlsx]

## Sheet: Sheet1
Supplementary Material S7. Datasheet with extracted biomarker and cohort details. Each line represents one biomarker exmained in one unique set of patient cohorts (one PDAC and one control). Biomarkers can be listed more than once as they are exmained in separate patient cohorts.
Study ID	PMID	Title	Corresponding Author Name	Corresponding Author Email	Country in which the study was conducted	Study funding sources	Possible conflicts of interest	Ethical Approval	Study design	Fluid Type	Time of blood draw	Start date (MM/YYYY)	End date (MM/YYYY)	Paper specify PDAC	Paper examined multiple markers	Number of Markers	CA19-9 or Novel	Biomarker Name	Biomarker Type	Blinded	Cohorts	Number patients in PDAC cohort	Males	Females	Age range	Age median	Age mean	How was PDAC confirmed?	PDAC cohort ALL metastatic	Stage Details	Treatment prior to Blood Draw	Treatment details	Number of patients in Healthy Cohort	Males	Females	Age range	Age median	Age mean	Details on how chosen	Number of patients in benign cohort 1	Condition	Males	Females	Age range	Age median	Age mean	Details on the medical status of the group	Number of patients in benign cohort 2	Condition
#296	PMID: 23719603	Profiling the potential tumor markers of pancreatic ductal adenocarcinoma using 2D-DIGE and MALDI-TOF-MS: Up-regulation of Complement C3 and alpha-2-HS-glycoprotein	Jiong Chen	ch_jiong@126.com	China	This study was supported by the National Natural ScienceFoundation of China (Grant No. 81071985) and the Anhui ProvinceNatural Science Foundation Program (Grant No. 11010402172).	None Declared	Yes	Prospective	Serum	Prior to cyst puncture by Surgery	2009-05-01	2011-04-01	PDAC	Yes	1	Novel	Complement component C3 (C3)	Single marker	No	PDAC vs Healthy	40	24	16	37-81	63	60.175		No	Stage I (2), Stage II (22), Stage III (14), Stage IV (2)	No		40						Cancer-free individuals with no statictical difference in age, sex, pathological type, differentiation and metastasis status
#296	PMID: 23719603	Profiling the potential tumor markers of pancreatic ductal adenocarcinoma using 2D-DIGE and MALDI-TOF-MS: Up-regulation of Complement C3 and alpha-2-HS-glycoprotein	Jiong Chen	ch_jiong@126.com	China	This study was supported by the National Natural ScienceFoundation of China (Grant No. 81071985) and the Anhui ProvinceNatural Science Foundation Program (Grant No. 11010402172).	None Declared	Yes	Prospective	Serum	Prior to cyst puncture by Surgery	2009-05-01	2011-04-01	PDAC	Yes	1	Novel	Hemopexin (HPX)	Single marker	No	PDAC vs Healthy	40	24	16	37-81	63	60.175		No	Stage I (2), Stage II (22), Stage III (14), Stage IV (2)	No		40						Cancer-free individuals with no statictical difference in age, sex, pathological type, differentiation and metastasis status
#296	PMID: 23719603	Profiling the potential tumor markers of pancreatic ductal adenocarcinoma using 2D-DIGE and MALDI-TOF-MS: Up-regulation of Complement C3 and alpha-2-HS-glycoprotein	Jiong Chen	ch_jiong@126.com	China	This study was supported by the National Natural ScienceFoundation of China (Grant No. 81071985) and the Anhui ProvinceNatural Science Foundation Program (Grant No. 11010402172).	None Declared	Yes	Prospective	Serum	Prior to cyst puncture by Surgery	2009-05-01	2011-04-01	PDAC	Yes	1	Novel	Alpha-2-HS-glycoprotein (AHSG)	Single marker	No	PDAC vs Healthy	40	24	16	37-81	63	60.175		No	Stage I (2), Stage II (22), Stage III (14), Stage IV (2)	No		40						Cancer-free individuals with no statictical difference in age, sex, pathological type, differentiation and metastasis status
#296	PMID: 23719603	Profiling the potential tumor markers of pancreatic ductal adenocarcinoma using 2D-DIGE and MALDI-TOF-MS: Up-regulation of Complement C3 and alpha-2-HS-glycoprotein	Jiong Chen	ch_jiong@126.com	China	This study was supported by the National Natural ScienceFoundation of China (Grant No. 81071985) and the Anhui ProvinceNatural Science Foundation Program (Grant No. 11010402172).	None Declared	Yes	Prospective	Serum	Prior to cyst puncture by Surgery	2009-05-01	2011-04-01	PDAC	Yes	1	Novel	Apolipoprotein H (ApoH)	Single marker	No	PDAC vs Healthy	40	24	16	37-81	63	60.175		No	Stage I (2), Stage II (22), Stage III (14), Stage IV (2)	No		40						Cancer-free individuals with no statictical difference in age, sex, pathological type, differentiation and metastasis status
#296	PMID: 23719603	Profiling the potential tumor markers of pancreatic ductal adenocarcinoma using 2D-DIGE and MALDI-TOF-MS: Up-regulation of Complement C3 and alpha-2-HS-glycoprotein	Jiong Chen	ch_jiong@126.com	China	This study was supported by the National Natural ScienceFoundation of China (Grant No. 81071985) and the Anhui ProvinceNatural Science Foundation Program (Grant No. 11010402172).	None Declared	Yes	Prospective	Serum	Prior to cyst puncture by Surgery	2009-05-01	2011-04-01	PDAC	Yes	1	Novel	Serotransferrin (TF)	Single marker	No	PDAC vs Healthy	40	24	16	37-81	63	60.175		No	Stage I (2), Stage II (22), Stage III (14), Stage IV (2)	No		40						Cancer-free individuals with no statictical difference in age, sex, pathological type, differentiation and metastasis status
#296	PMID: 23719603	Profiling the potential tumor markers of pancreatic ductal adenocarcinoma using 2D-DIGE and MALDI-TOF-MS: Up-regulation of Complement C3 and alpha-2-HS-glycoprotein	Jiong Chen	ch_jiong@126.com	China	This study was supported by the National Natural ScienceFoundation of China (Grant No. 81071985) and the Anhui ProvinceNatural Science Foundation Program (Grant No. 11010402172).	None Declared	Yes	Prospective	Serum	Prior to cyst puncture by Surgery	2009-05-01	2011-04-01	PDAC	Yes	1	Novel	Haptoglobin (HP)	Single marker	No	PDAC vs Healthy	40	24	16	37-81	63	60.175		No	Stage I (2), Stage II (22), Stage III (14), Stage IV (2)	No		40						Cancer-free individuals with no statictical difference in age, sex, pathological type, differentiation and metastasis status
#296	PMID: 23719603	Profiling the potential tumor markers of pancreatic ductal adenocarcinoma using 2D-DIGE and MALDI-TOF-MS: Up-regulation of Complement C3 and alpha-2-HS-glycoprotein	Jiong Chen	ch_jiong@126.com	China	This study was supported by the National Natural ScienceFoundation of China (Grant No. 81071985) and the Anhui ProvinceNatural Science Foundation Program (Grant No. 11010402172).	None Declared	Yes	Prospective	Serum	Prior to cyst puncture by Surgery	2009-05-01	2011-04-01	PDAC	Yes	1	Novel	Apolipoprotein E (ApoE)	Single marker	No	PDAC vs Healthy	40	24	16	37-81	63	60.175		No	Stage I (2), Stage II (22), Stage III (14), Stage IV (2)	No		40						Cancer-free individuals with no statictical difference in age, sex, pathological type, differentiation and metastasis status
#296	PMID: 23719603	Profiling the potential tumor markers of pancreatic ductal adenocarcinoma using 2D-DIGE and MALDI-TOF-MS: Up-regulation of Complement C3 and alpha-2-HS-glycoprotein	Jiong Chen	ch_jiong@126.com	China	This study was supported by the National Natural ScienceFoundation of China (Grant No. 81071985) and the Anhui ProvinceNatural Science Foundation Program (Grant No. 11010402172).	None Declared	Yes	Prospective	Serum	Prior to cyst puncture by Surgery	2009-05-01	2011-04-01	PDAC	Yes	1	Novel	Transthyretin (TTR)	Single marker	No	PDAC vs Healthy	40	24	16	37-81	63	60.175		No	Stage I (2), Stage II (22), Stage III (14), Stage IV (2)	No		40						Cancer-free individuals with no statictical difference in age, sex, pathological type, differentiation and metastasis status
#296	PMID: 23719603	Profiling the potential tumor markers of pancreatic ductal adenocarcinoma using 2D-DIGE and MALDI-TOF-MS: Up-regulation of Complement C3 and alpha-2-HS-glycoprotein	Jiong Chen	ch_jiong@126.com	China	This study was supported by the National Natural ScienceFoundation of China (Grant No. 81071985) and the Anhui ProvinceNatural Science Foundation Program (Grant No. 11010402172).	None Declared	Yes	Prospective	Serum	Prior to cyst puncture by Surgery	2009-05-01	2011-04-01	PDAC	Yes	1	Novel	Serum amyloid P-component (APCS)	Single marker	No	PDAC vs Healthy	40	24	16	37-81	63	60.175		No	Stage I (2), Stage II (22), Stage III (14), Stage IV (2)	No		40						Cancer-free individuals with no statictical difference in age, sex, pathological type, differentiation and metastasis status
#296	PMID: 23719603	Profiling the potential tumor markers of pancreatic ductal adenocarcinoma using 2D-DIGE and MALDI-TOF-MS: Up-regulation of Complement C3 and alpha-2-HS-glycoprotein	Jiong Chen	ch_jiong@126.com	China	This study was supported by the National Natural ScienceFoundation of China (Grant No. 81071985) and the Anhui ProvinceNatural Science Foundation Program (Grant No. 11010402172).	None Declared	Yes	Prospective	Serum	Prior to cyst puncture by Surgery	2009-05-01	2011-04-01	PDAC	Yes	1	Novel	Isoform 2 of Ig mu chain C region	Single marker	No	PDAC vs Healthy	40	24	16	37-81	63	60.175		No	Stage I (2), Stage II (22), Stage III (14), Stage IV (2)	No		40						Cancer-free individuals with no statictical difference in age, sex, pathological type, differentiation and metastasis status
#296	PMID: 23719603	Profiling the potential tumor markers of pancreatic ductal adenocarcinoma using 2D-DIGE and MALDI-TOF-MS: Up-regulation of Complement C3 and alpha-2-HS-glycoprotein	Jiong Chen	ch_jiong@126.com	China	This study was supported by the National Natural ScienceFoundation of China (Grant No. 81071985) and the Anhui ProvinceNatural Science Foundation Program (Grant No. 11010402172).	None Declared	Yes	Prospective	Serum	Prior to cyst puncture by Surgery	2009-05-01	2011-04-01	PDAC	Yes	1	Novel	F2 Prothrombin	Single marker	No	PDAC vs Healthy	40	24	16	37-81	63	60.175		No	Stage I (2), Stage II (22), Stage III (14), Stage IV (2)	No		40						Cancer-free individuals with no statictical difference in age, sex, pathological type, differentiation and metastasis status
#296	PMID: 23719603	Profiling the potential tumor markers of pancreatic ductal adenocarcinoma using 2D-DIGE and MALDI-TOF-MS: Up-regulation of Complement C3 and alpha-2-HS-glycoprotein	Jiong Chen	ch_jiong@126.com	China	This study was supported by the National Natural ScienceFoundation of China (Grant No. 81071985) and the Anhui ProvinceNatural Science Foundation Program (Grant No. 11010402172).	None Declared	Yes	Prospective	Serum	Prior to cyst puncture by Surgery	2009-05-01	2011-04-01	PDAC	Yes	1	Novel	Ficolin-3 (FCN3)	Single marker	No	PDAC vs Healthy	40	24	16	37-81	63	60.175		No	Stage I (2), Stage II (22), Stage III (14), Stage IV (2)	No		40						Cancer-free individuals with no statictical difference in age, sex, pathological type, differentiation and metastasis status
#296	PMID: 23719603	Profiling the potential tumor markers of pancreatic ductal adenocarcinoma using 2D-DIGE and MALDI-TOF-MS: Up-regulation of Complement C3 and alpha-2-HS-glycoprotein	Jiong Chen	ch_jiong@126.com	China	This study was supported by the National Natural ScienceFoundation of China (Grant No. 81071985) and the Anhui ProvinceNatural Science Foundation Program (Grant No. 11010402172).	None Declared	Yes	Prospective	Serum	Prior to cyst puncture by Surgery	2009-05-01	2011-04-01	PDAC	Yes	1	Novel	Vitronectin (VTN)	Single marker	No	PDAC vs Healthy	40	24	16	37-81	63	60.175		No	Stage I (2), Stage II (22), Stage III (14), Stage IV (2)	No		40						Cancer-free individuals with no statictical difference in age, sex, pathological type, differentiation and metastasis status
#296	PMID: 23719603	Profiling the potential tumor markers of pancreatic ductal adenocarcinoma using 2D-DIGE and MALDI-TOF-MS: Up-regulation of Complement C3 and alpha-2-HS-glycoprotein	Jiong Chen	ch_jiong@126.com	China	This study was supported by the National Natural ScienceFoundation of China (Grant No. 81071985) and the Anhui ProvinceNatural Science Foundation Program (Grant No. 11010402172).	None Declared	Yes	Prospective	Serum	Prior to cyst puncture by Surgery	2009-05-01	2011-04-01	PDAC	Yes	1	Novel	Serum albumin (ALB)	Single marker	No	PDAC vs Healthy	40	24	16	37-81	63	60.175		No	Stage I (2), Stage II (22), Stage III (14), Stage IV (2)	No		40						Cancer-free individuals with no statictical difference in age, sex, pathological type, differentiation and metastasis status
#8119		Nanotrap-enabled quantification of KRAS-induced peptide hydroxylation in blood for cancer early detection	Tony Hu	Tony.hu@asu.edu	USA	The work was primarily supported by research funding provided by Arizona Biomedical Research Commission (ABRC) young investigator award and ASU-Mayo seed funds.	Not mentioned	Yes	Prospective	Plasma	No details given	2006	2014	PDAC	Yes	2	Novel	Hydroxylated bradykinin (Hyp-BK)/ bradykinin (BK) ratio [Hyp-BK/BK]	Multi-marker panel	Yes	PDAC vs Benign	46	18	20			53.7		No	Stage II (25), Stage III (6), Unknown (15)	Unsure									38	Pancreatitis	18	20			53.7
#2286	PMID: 31626700	Hypoxia-Induced TGFBI as a Serum Biomarker for Laboratory Diagnosis and Prognosis in Patients with Pancreatic Ductal Adenocarcinoma	Yajun Gu	guyajun@tmu.edu.cn	China	This work was supported by National Natural Science Foundation of China [grant numbers 81601820; 21705160].	Not mentioned	Yes	Prospective	Serum	No details given	2017-10-01	2018-04-01	PDAC	Yes	1	Novel	Transforming growth factor–β-induced (TGFBI)	Single marker	No	PDAC vs Healthy	28						Pathology	No		Unsure		56
#2286	PMID: 31626700	Hypoxia-Induced TGFBI as a Serum Biomarker for Laboratory Diagnosis and Prognosis in Patients with Pancreatic Ductal Adenocarcinoma	Yajun Gu	guyajun@tmu.edu.cn	China	This work was supported by National Natural Science Foundation of China [grant numbers 81601820; 21705160].	Not mentioned	Yes	Prospective	Serum	No details given	2017-10-01	2018-04-01	PDAC	Yes	2	CA19-9	Transforming growth factor–β-induced (TGFBI) & CA19-9	Multi-marker panel	No	PDAC vs Healthy	28						Pathology	No		Unsure		56
#2286	PMID: 31626700	Hypoxia-Induced TGFBI as a Serum Biomarker for Laboratory Diagnosis and Prognosis in Patients with Pancreatic Ductal Adenocarcinoma	Yajun Gu	guyajun@tmu.edu.cn	China	This work was supported by National Natural Science Foundation of China [grant numbers 81601820; 21705160].	Not mentioned	Yes	Prospective	Serum	No details given	2017-10-01	2018-04-01	PDAC	Yes	1	CA19-9	CA19-9	Single marker	No	PDAC vs Healthy	28						Pathology	No		Unsure		56
#2286	PMID: 31626700	Hypoxia-Induced TGFBI as a Serum Biomarker for Laboratory Diagnosis and Prognosis in Patients with Pancreatic Ductal Adenocarcinoma	Yajun Gu	guyajun@tmu.edu.cn	China	This work was supported by National Natural Science Foundation of China [grant numbers 81601820; 21705160].	Not mentioned	Yes	Prospective	Serum	No details given	2017-10-01	2018-04-01	PDAC	Yes	1	Novel	Glycoprotein NBM (GPNMB)	Single marker	No	PDAC vs Healthy	28						Pathology	No		Unsure		56
#2286	PMID: 31626700	Hypoxia-Induced TGFBI as a Serum Biomarker for Laboratory Diagnosis and Prognosis in Patients with Pancreatic Ductal Adenocarcinoma	Yajun Gu	guyajun@tmu.edu.cn	China	This work was supported by National Natural Science Foundation of China [grant numbers 81601820; 21705160].	Not mentioned	Yes	Prospective	Serum	No details given	2017-10-01	2018-04-01	PDAC	Yes	1	Novel	Biglycan (BGN)	Single marker	No	PDAC vs Healthy	28						Pathology	No		Unsure		56
#2286	PMID: 31626700	Hypoxia-Induced TGFBI as a Serum Biomarker for Laboratory Diagnosis and Prognosis in Patients with Pancreatic Ductal Adenocarcinoma	Yajun Gu	guyajun@tmu.edu.cn	China	This work was supported by National Natural Science Foundation of China [grant numbers 81601820; 21705160].	Not mentioned	Yes	Prospective	Serum	No details given	2017-10-01	2018-04-01	PDAC	Yes	1	Novel	Insulin-like growth factor–binding protein 3 (IGFBP3)	Single marker	No	PDAC vs Healthy	28						Pathology	No		Unsure		56
#4103	PMID: 18329114	Elevated chromogranin A (CgA) serum levels in the patients with advanced pancreatic cancer	Massimo Motta	mottam@unict.it	Italy	Not given	Not mentioned	Yes	Prospective	Serum	Prior to cyst puncture by Surgery			PC	Yes	1	Novel	CgA	Single marker	No	PDAC vs Healthy	75	47	28	65-80		65.8	Pathohistology	No	Stage I (2), Stage II (12), Stage III (26), Stage IV (26)	No		20	10	10	65-80		65.4
#4103	PMID: 18329114	Elevated chromogranin A (CgA) serum levels in the patients with advanced pancreatic cancer	Massimo Motta	mottam@unict.it	Italy	Not given	Not mentioned	Yes	Prospective	Serum	Prior to cyst puncture by Surgery			PC	Yes	1	Novel	CgA	Single marker	No	PDAC vs Benign	75	47	28	65-80		65.8	Pathohistology	No	Stage I (2), Stage II (12), Stage III (26), Stage IV (26)	No									30	Chronic Pancreatitis	14	16	65-80		65.7
#4103	PMID: 18329114	Elevated chromogranin A (CgA) serum levels in the patients with advanced pancreatic cancer	Massimo Motta	mottam@unict.it	Italy	Not given	Not mentioned	Yes	Prospective	Serum	Prior to cyst puncture by Surgery			PC	Yes	1	CA19-9	CA19-9	Single marker	No	PDAC vs Healthy	75	47	28	65-80		65.8	Pathohistology	No	Stage I (2), Stage II (12), Stage III (26), Stage IV (26)	No		20	10	10	65-80		65.4
#4103	PMID: 18329114	Elevated chromogranin A (CgA) serum levels in the patients with advanced pancreatic cancer	Massimo Motta	mottam@unict.it	Italy	Not given	Not mentioned	Yes	Prospective	Serum	Prior to cyst puncture by Surgery			PC	Yes	1	CA19-9	CA19-9	Single marker	No	PDAC vs Benign	75	47	28	65-80		65.8	Pathohistology	No	Stage I (2), Stage II (12), Stage III (26), Stage IV (26)	No									30	Chronic Pancreatitis	14	16	65-80		65.7
#909	PMID: 21732554	A multiplexed bead assay for profiling glycosylation patterns on serum protein biomarkers of pancreatic cancer	David M. Lubman	dmlubman@umich.edu	USA	This work was supported by the National Cancer Institute under R21CA124441 (D. M. L.), the National Institute of Health under R01GM49500 (D. M. L.), and K23 DK082097(M. A. A.).	None Declared	Yes	Prospective	Serum	Prior to cyst puncture by Surgery			PDAC	Yes	1	Novel	α-1-b glycoprotein (A1BG)	Single marker	No	PDAC vs Benign	20	10	10	44-83		65.2	Histology	No	Stage III (10), Stage IV (10)	No									20	Chronic Pancreatitis	12	8	48-83		62.6
#942	PMID: 32243066	SST gene hypermethylation acts as a pan-cancer marker for pancreatic ductal adenocarcinoma and multiple other tumors: toward its use for blood-based diagnosis	Mehdi Manoochehri	m.manoochehri@dkfz.de	Germany	This work was supported financially by a grant to JDH of the German Federal Ministry of Education and Research (BMBF) as part of grant no. 01GS08117 within the PaCaNet consortium	None Declared	Yes	Prospective	Serum	No details given			PDAC	No	1	Novel	SST gene hypermethylation	Single marker	No	PDAC vs Healthy	30							No	15 metastatic and 15 non-metastatic	Unsure		18
#942	PMID: 32243066	SST gene hypermethylation acts as a pan-cancer marker for pancreatic ductal adenocarcinoma and multiple other tumors: toward its use for blood-based diagnosis	Mehdi Manoochehri	m.manoochehri@dkfz.de	Germany	This work was supported financially by a grant to JDH of the German Federal Ministry of Education and Research (BMBF) as part of grant no. 01GS08117 within the PaCaNet consortium	None Declared	Yes	Prospective	Serum	No details given			PDAC	No	1	Novel	SST gene hypermethylation	Single marker	No	PDAC vs Healthy	15							No	Non-metastatic	Unsure		18
#942	PMID: 32243066	SST gene hypermethylation acts as a pan-cancer marker for pancreatic ductal adenocarcinoma and multiple other tumors: toward its use for blood-based diagnosis	Mehdi Manoochehri	m.manoochehri@dkfz.de	Germany	This work was supported financially by a grant to JDH of the German Federal Ministry of Education and Research (BMBF) as part of grant no. 01GS08117 within the PaCaNet consortium	None Declared	Yes	Prospective	Serum	No details given			PDAC	No	1	Novel	SST gene hypermethylation	Single marker	No	PDAC vs Healthy	15							Yes	Metastatic	Unsure		18
#3725	PMID: 28627758	Spectral library-based glycopeptide analysis-detection of circulating galectin-3 binding protein in pancreatic cancer	Sheng Pan	shengp@medicine.washington.edu	USA	This work was supported in part with federal funds from the National Institutes of Health under grants R01CA180949, K25CA137222 and R21CA149772, the Donald E. Bocek Endowed Research Development Award in Pancreatic Cancer, and the University of Washington’s Proteomics Resource (UWPR95794).	None Declared	Yes	Prospective	Serum	No details given			PDAC	Yes	1	Novel	ALGFEN[+1]ATQALGR++	Single marker	Yes	PDAC vs Healthy	17						Histology	No	Stage I (2), Stage II (15)	No		16
#3725	PMID: 28627758	Spectral library-based glycopeptide analysis-detection of circulating galectin-3 binding protein in pancreatic cancer	Sheng Pan	shengp@medicine.washington.edu	USA	This work was supported in part with federal funds from the National Institutes of Health under grants R01CA180949, K25CA137222 and R21CA149772, the Donald E. Bocek Endowed Research Development Award in Pancreatic Cancer, and the University of Washington’s Proteomics Resource (UWPR95794).	None Declared	Yes	Prospective	Serum	No details given			PDAC	Yes	1	Novel	ALGFEN[+1]ATQALGR++	Single marker	Yes	PDAC vs Benign	17						Histology	No	Stage I (2), Stage II (15)	No									16	Chronic Pancreatitis						CP was diagnosed based on computed tomography (CT) scan showing calcifications, ductal dilation and atrophy, or by the presence of structural and functional abnormalities detected by combined endoscopic ultrasound (EUS) and/or secretin pancreatic function testing.
#3725	PMID: 28627758	Spectral library-based glycopeptide analysis-detection of circulating galectin-3 binding protein in pancreatic cancer	Sheng Pan	shengp@medicine.washington.edu	USA	This work was supported in part with federal funds from the National Institutes of Health under grants R01CA180949, K25CA137222 and R21CA149772, the Donald E. Bocek Endowed Research Development Award in Pancreatic Cancer, and the University of Washington’s Proteomics Resource (UWPR95794).	None Declared	Yes	Prospective	Serum	No details given			PDAC	Yes	1	Novel	DAGVVC[+57]TN[+1]ETR++	Single marker	Yes	PDAC vs Healthy	17						Histology	No	Stage I (2), Stage II (15)	No		16
#3725	PMID: 28627758	Spectral library-based glycopeptide analysis-detection of circulating galectin-3 binding protein in pancreatic cancer	Sheng Pan	shengp@medicine.washington.edu	USA	This work was supported in part with federal funds from the National Institutes of Health under grants R01CA180949, K25CA137222 and R21CA149772, the Donald E. Bocek Endowed Research Development Award in Pancreatic Cancer, and the University of Washington’s Proteomics Resource (UWPR95794).	None Declared	Yes	Prospective	Serum	No details given			PDAC	Yes	1	Novel	AAIPSALDTN[+1]SSK++	Single marker	Yes	PDAC vs Healthy	17						Histology	No	Stage I (2), Stage II (15)	No		16
#3725	PMID: 28627758	Spectral library-based glycopeptide analysis-detection of circulating galectin-3 binding protein in pancreatic cancer	Sheng Pan	shengp@medicine.washington.edu	USA	This work was supported in part with federal funds from the National Institutes of Health under grants R01CA180949, K25CA137222 and R21CA149772, the Donald E. Bocek Endowed Research Development Award in Pancreatic Cancer, and the University of Washington’s Proteomics Resource (UWPR95794).	None Declared	Yes	Prospective	Serum	No details given			PDAC	Yes	1	Novel	AAIPSALDTN[+1]SSK++	Single marker	Yes	PDAC vs Benign	17						Histology	No	Stage I (2), Stage II (15)	No									16	Chronic Pancreatitis						CP was diagnosed based on computed tomography (CT) scan showing calcifications, ductal dilation and atrophy, or by the presence of structural and functional abnormalities detected by combined endoscopic ultrasound (EUS) and/or secretin pancreatic function testing.
#750	PMID: 14871961	Serum Diagnosis of Pancreatic Adenocarcinoma Using Surface-Enhanced Laser Desorption and Ionization Mass Spectrometry	Michael Goggins	mgoggins@jhmi.edu.	USA	Mildred-Scheel-Stiftung, Deutsche Krebshilfe, the NIH Specialized Programs of Research Excellence Grant #CA62924, the Lustgarten Foundation for Pancreatic Cancer Research, and Ciphergen Biosystems, Inc.	Not mentioned	Yes	Prospective	Serum	Prior to cyst puncture by Surgery	1997	2002	PDAC	Yes	1	CA19-9	CA19-9	Single marker	No	PDAC vs Healthy	60	30	30			64.1	Histopathology	No	T3N1Mx n=46, T3N0Mx n=5, T2N1Mx n=3, T1N1Mx n=1, and T1N0Mx n=3	No		60	30	30			64.6	Normal controls consisted of 60 age- and sex-matched individuals without known malignant disease taking part in a longitudinal study of aging
#750	PMID: 14871961	Serum Diagnosis of Pancreatic Adenocarcinoma Using Surface-Enhanced Laser Desorption and Ionization Mass Spectrometry	Michael Goggins	mgoggins@jhmi.edu.	USA	Mildred-Scheel-Stiftung, Deutsche Krebshilfe, the NIH Specialized Programs of Research Excellence Grant #CA62924, the Lustgarten Foundation for Pancreatic Cancer Research, and Ciphergen Biosystems, Inc.	Not mentioned	Yes	Prospective	Serum	Prior to cyst puncture by Surgery	1997	2002	PDAC	Yes	2	Novel	m/z 3146 & m/z 12,861	Multi-marker panel	No	PDAC vs Healthy	60	30	30			64.1	Histopathology	No	T3N1Mx n=46, T3N0Mx n=5, T2N1Mx n=3, T1N1Mx n=1, and T1N0Mx n=4	No		60	30	30			64.6	Normal controls consisted of 60 age- and sex-matched individuals without known malignant disease taking part in a longitudinal study of aging
#750	PMID: 14871961	Serum Diagnosis of Pancreatic Adenocarcinoma Using Surface-Enhanced Laser Desorption and Ionization Mass Spectrometry	Michael Goggins	mgoggins@jhmi.edu.	USA	Mildred-Scheel-Stiftung, Deutsche Krebshilfe, the NIH Specialized Programs of Research Excellence Grant #CA62924, the Lustgarten Foundation for Pancreatic Cancer Research, and Ciphergen Biosystems, Inc.	Not mentioned	Yes	Prospective	Serum	Prior to cyst puncture by Surgery	1997	2002	PDAC	Yes	4	Novel	m/z 3473 & m/z 5903 & m/z 8563 & m/z 16008	Multi-marker panel	No	PDAC vs Healthy	60	30	30			64.1	Histopathology	No	T3N1Mx n=46, T3N0Mx n=5, T2N1Mx n=3, T1N1Mx n=1, and T1N0Mx n=5	No		60	30	30			64.6	Normal controls consisted of 60 age- and sex-matched individuals without known malignant disease taking part in a longitudinal study of aging
#750	PMID: 14871961	Serum Diagnosis of Pancreatic Adenocarcinoma Using Surface-Enhanced Laser Desorption and Ionization Mass Spectrometry	Michael Goggins	mgoggins@jhmi.edu.	USA	Mildred-Scheel-Stiftung, Deutsche Krebshilfe, the NIH Specialized Programs of Research Excellence Grant #CA62924, the Lustgarten Foundation for Pancreatic Cancer Research, and Ciphergen Biosystems, Inc.	Not mentioned	Yes	Prospective	Serum	Prior to cyst puncture by Surgery	1997	2002	PDAC	Yes	5	CA19-9	CA19-9 & m/z 3473 & m/z 5903 & m/z 8563 & m/z 16008	Multi-marker panel	No	PDAC vs Healthy	60	30	30			64.1	Histopathology	No	T3N1Mx n=46, T3N0Mx n=5, T2N1Mx n=3, T1N1Mx n=1, and T1N0Mx n=6	No		60	30	30			64.6	Normal controls consisted of 60 age- and sex-matched individuals without known malignant disease taking part in a longitudinal study of aging
#750	PMID: 14871961	Serum Diagnosis of Pancreatic Adenocarcinoma Using Surface-Enhanced Laser Desorption and Ionization Mass Spectrometry	Michael Goggins	mgoggins@jhmi.edu.	USA	Mildred-Scheel-Stiftung, Deutsche Krebshilfe, the NIH Specialized Programs of Research Excellence Grant #CA62924, the Lustgarten Foundation for Pancreatic Cancer Research, and Ciphergen Biosystems, Inc.	Not mentioned	Yes	Prospective	Serum	Prior to cyst puncture by Surgery	1997	2002	PDAC	Yes	3	CA19-9	CA19-9 & m/z 3146 & m/z 12,861	Multi-marker panel	No	PDAC vs Healthy	60	30	30			64.1	Histopathology	No	T3N1Mx n=46, T3N0Mx n=5, T2N1Mx n=3, T1N1Mx n=1, and T1N0Mx n=7	No		60	30	30			64.6	Normal controls consisted of 60 age- and sex-matched individuals without known malignant disease taking part in a longitudinal study of aging
#750	PMID: 14871961	Serum Diagnosis of Pancreatic Adenocarcinoma Using Surface-Enhanced Laser Desorption and Ionization Mass Spectrometry	Michael Goggins	mgoggins@jhmi.edu.	USA	Mildred-Scheel-Stiftung, Deutsche Krebshilfe, the NIH Specialized Programs of Research Excellence Grant #CA62924, the Lustgarten Foundation for Pancreatic Cancer Research, and Ciphergen Biosystems, Inc.	Not mentioned	Yes	Prospective	Serum	Prior to cyst puncture by Surgery	1997	2002	PDAC	Yes	3	Novel	m/z 3885 & m/z 3967 & m/z 8929	Multi-marker panel	No	PDAC vs Healthy	60	30	30			64.1	Histopathology	No	T3N1Mx n=46, T3N0Mx n=5, T2N1Mx n=3, T1N1Mx n=1, and T1N0Mx n=8	No		60	30	30			64.6	Normal controls consisted of 60 age- and sex-matched individuals without known malignant disease taking part in a longitudinal study of aging
#750	PMID: 14871961	Serum Diagnosis of Pancreatic Adenocarcinoma Using Surface-Enhanced Laser Desorption and Ionization Mass Spectrometry	Michael Goggins	mgoggins@jhmi.edu.	USA	Mildred-Scheel-Stiftung, Deutsche Krebshilfe, the NIH Specialized Programs of Research Excellence Grant #CA62924, the Lustgarten Foundation for Pancreatic Cancer Research, and Ciphergen Biosystems, Inc.	Not mentioned	Yes	Prospective	Serum	Prior to cyst puncture by Surgery	1997	2002	PDAC	Yes	1	CA19-9	CA19-9	Single marker	No	PDAC vs Benign	60	30	30			64.1	Histopathology	No	T3N1Mx n=46, T3N0Mx n=5, T2N1Mx n=3, T1N1Mx n=1, and T1N0Mx n=9	No									120	Other	60	60			63.35	healthy (n=60), chronic (n=20) and acute-on-chronic pancreatitis (n=6), neuroendocrine tumors (n=8), pancreatic cysts (n=8), pancreatic cystadenoma (n=6), ampullary adenoma (n=4), intraductal papillary mucinous neoplasms (n=4), low-grade pancreatic intraepithelial neoplasia (n=2), duodenal adenoma (n=1), and choledochal cyst (n=1)
#750	PMID: 14871961	Serum Diagnosis of Pancreatic Adenocarcinoma Using Surface-Enhanced Laser Desorption and Ionization Mass Spectrometry	Michael Goggins	mgoggins@jhmi.edu.	USA	Mildred-Scheel-Stiftung, Deutsche Krebshilfe, the NIH Specialized Programs of Research Excellence Grant #CA62924, the Lustgarten Foundation for Pancreatic Cancer Research, and Ciphergen Biosystems, Inc.	Not mentioned	Yes	Prospective	Serum	Prior to cyst puncture by Surgery	1997	2002	PDAC	Yes	3	Novel	m/z 3667 & m/z 7441 & m/z 12861	Multi-marker panel	No	PDAC vs Benign	60	30	30			64.1	Histopathology	No	T3N1Mx n=46, T3N0Mx n=5, T2N1Mx n=3, T1N1Mx n=1, and T1N0Mx n=10	No									120	Other	60	60			63.35	healthy (n=60), chronic (n=20) and acute-on-chronic pancreatitis (n=6), neuroendocrine tumors (n=8), pancreatic cysts (n=8), pancreatic cystadenoma (n=6), ampullary adenoma (n=4), intraductal papillary mucinous neoplasms (n=4), low-grade pancreatic intraepithelial neoplasia (n=2), duodenal adenoma (n=1), and choledochal cyst (n=1)
#750	PMID: 14871961	Serum Diagnosis of Pancreatic Adenocarcinoma Using Surface-Enhanced Laser Desorption and Ionization Mass Spectrometry	Michael Goggins	mgoggins@jhmi.edu.	USA	Mildred-Scheel-Stiftung, Deutsche Krebshilfe, the NIH Specialized Programs of Research Excellence Grant #CA62924, the Lustgarten Foundation for Pancreatic Cancer Research, and Ciphergen Biosystems, Inc.	Not mentioned	Yes	Prospective	Serum	Prior to cyst puncture by Surgery	1997	2002	PDAC	Yes	3	Novel	m/z 3473 & m/z 5903 & m/z 8563	Multi-marker panel	No	PDAC vs Benign	60	30	30			64.1	Histopathology	No	T3N1Mx n=46, T3N0Mx n=5, T2N1Mx n=3, T1N1Mx n=1, and T1N0Mx n=11	No									120	Other	60	60			63.35	healthy (n=60), chronic (n=20) and acute-on-chronic pancreatitis (n=6), neuroendocrine tumors (n=8), pancreatic cysts (n=8), pancreatic cystadenoma (n=6), ampullary adenoma (n=4), intraductal papillary mucinous neoplasms (n=4), low-grade pancreatic intraepithelial neoplasia (n=2), duodenal adenoma (n=1), and choledochal cyst (n=1)
#750	PMID: 14871961	Serum Diagnosis of Pancreatic Adenocarcinoma Using Surface-Enhanced Laser Desorption and Ionization Mass Spectrometry	Michael Goggins	mgoggins@jhmi.edu.	USA	Mildred-Scheel-Stiftung, Deutsche Krebshilfe, the NIH Specialized Programs of Research Excellence Grant #CA62924, the Lustgarten Foundation for Pancreatic Cancer Research, and Ciphergen Biosystems, Inc.	Not mentioned	Yes	Prospective	Serum	Prior to cyst puncture by Surgery	1997	2002	PDAC	Yes	4	CA19-9	CA19-9 & m/z 3667 & m/z 7441 & m/z 12861	Multi-marker panel	No	PDAC vs Benign	60	30	30			64.1	Histopathology	No	T3N1Mx n=46, T3N0Mx n=5, T2N1Mx n=3, T1N1Mx n=1, and T1N0Mx n=12	No									120	Other	60	60			63.35	healthy (n=60), chronic (n=20) and acute-on-chronic pancreatitis (n=6), neuroendocrine tumors (n=8), pancreatic cysts (n=8), pancreatic cystadenoma (n=6), ampullary adenoma (n=4), intraductal papillary mucinous neoplasms (n=4), low-grade pancreatic intraepithelial neoplasia (n=2), duodenal adenoma (n=1), and choledochal cyst (n=1)
#750	PMID: 14871961	Serum Diagnosis of Pancreatic Adenocarcinoma Using Surface-Enhanced Laser Desorption and Ionization Mass Spectrometry	Michael Goggins	mgoggins@jhmi.edu.	USA	Mildred-Scheel-Stiftung, Deutsche Krebshilfe, the NIH Specialized Programs of Research Excellence Grant #CA62924, the Lustgarten Foundation for Pancreatic Cancer Research, and Ciphergen Biosystems, Inc.	Not mentioned	Yes	Prospective	Serum	Prior to cyst puncture by Surgery	1997	2002	PDAC	Yes	5	CA19-9	CA19-9 & m/z 3473 & m/z 5903 & m/z 8563 & m/z 16008	Multi-marker panel	No	PDAC vs Benign	60	30	30			64.1	Histopathology	No	T3N1Mx n=46, T3N0Mx n=5, T2N1Mx n=3, T1N1Mx n=1, and T1N0Mx n=13	No									120	Other	60	60			63.35	healthy (n=60), chronic (n=20) and acute-on-chronic pancreatitis (n=6), neuroendocrine tumors (n=8), pancreatic cysts (n=8), pancreatic cystadenoma (n=6), ampullary adenoma (n=4), intraductal papillary mucinous neoplasms (n=4), low-grade pancreatic intraepithelial neoplasia (n=2), duodenal adenoma (n=1), and choledochal cyst (n=1)
#750	PMID: 14871961	Serum Diagnosis of Pancreatic Adenocarcinoma Using Surface-Enhanced Laser Desorption and Ionization Mass Spectrometry	Michael Goggins	mgoggins@jhmi.edu.	USA	Mildred-Scheel-Stiftung, Deutsche Krebshilfe, the NIH Specialized Programs of Research Excellence Grant #CA62924, the Lustgarten Foundation for Pancreatic Cancer Research, and Ciphergen Biosystems, Inc.	Not mentioned	Yes	Prospective	Serum	Prior to cyst puncture by Surgery	1997	2002	PDAC	Yes	5	Novel	m/z 4277 & m/z 4639 & m/z 6093 & m/z 7463 & m/z 9132	Multi-marker panel	No	PDAC vs Benign	60	30	30			64.1	Histopathology	No	T3N1Mx n=46, T3N0Mx n=5, T2N1Mx n=3, T1N1Mx n=1, and T1N0Mx n=14	No									120	Other	60	60			63.35	healthy (n=60), chronic (n=20) and acute-on-chronic pancreatitis (n=6), neuroendocrine tumors (n=8), pancreatic cysts (n=8), pancreatic cystadenoma (n=6), ampullary adenoma (n=4), intraductal papillary mucinous neoplasms (n=4), low-grade pancreatic intraepithelial neoplasia (n=2), duodenal adenoma (n=1), and choledochal cyst (n=1)
#750	PMID: 14871961	Serum Diagnosis of Pancreatic Adenocarcinoma Using Surface-Enhanced Laser Desorption and Ionization Mass Spectrometry	Michael Goggins	mgoggins@jhmi.edu.	USA	Mildred-Scheel-Stiftung, Deutsche Krebshilfe, the NIH Specialized Programs of Research Excellence Grant #CA62924, the Lustgarten Foundation for Pancreatic Cancer Research, and Ciphergen Biosystems, Inc.	Not mentioned	Yes	Prospective	Serum	Prior to cyst puncture by Surgery	1997	2002	PDAC	Yes	1	CA19-9	CA19-9	Single marker	No	PDAC vs Benign	60	30	30			64.1	Histopathology	No	T3N1Mx n=46, T3N0Mx n=5, T2N1Mx n=3, T1N1Mx n=1, and T1N0Mx n=15	No																	26	Pancreatitis
#750	PMID: 14871961	Serum Diagnosis of Pancreatic Adenocarcinoma Using Surface-Enhanced Laser Desorption and Ionization Mass Spectrometry	Michael Goggins	mgoggins@jhmi.edu.	USA	Mildred-Scheel-Stiftung, Deutsche Krebshilfe, the NIH Specialized Programs of Research Excellence Grant #CA62924, the Lustgarten Foundation for Pancreatic Cancer Research, and Ciphergen Biosystems, Inc.	Not mentioned	Yes	Prospective	Serum	Prior to cyst puncture by Surgery	1997	2002	PDAC	Yes	3	Novel	m/z 4159 & m/z 4179 & m/z 7607	Multi-marker panel	No	PDAC vs Benign	60	30	30			64.1	Histopathology	No	T3N1Mx n=46, T3N0Mx n=5, T2N1Mx n=3, T1N1Mx n=1, and T1N0Mx n=16	No																	26	Pancreatitis
#750	PMID: 14871961	Serum Diagnosis of Pancreatic Adenocarcinoma Using Surface-Enhanced Laser Desorption and Ionization Mass Spectrometry	Michael Goggins	mgoggins@jhmi.edu.	USA	Mildred-Scheel-Stiftung, Deutsche Krebshilfe, the NIH Specialized Programs of Research Excellence Grant #CA62924, the Lustgarten Foundation for Pancreatic Cancer Research, and Ciphergen Biosystems, Inc.	Not mentioned	Yes	Prospective	Serum	Prior to cyst puncture by Surgery	1997	2002	PDAC	Yes	4	CA19-9	CA19-9 & m/z 4159 & m/z 4179 & m/z 7607	Multi-marker panel	No	PDAC vs Benign	60	30	30			64.1	Histopathology	No	T3N1Mx n=46, T3N0Mx n=5, T2N1Mx n=3, T1N1Mx n=1, and T1N0Mx n=17	No																	26	Pancreatitis
#750	PMID: 14871961	Serum Diagnosis of Pancreatic Adenocarcinoma Using Surface-Enhanced Laser Desorption and Ionization Mass Spectrometry	Michael Goggins	mgoggins@jhmi.edu.	USA	Mildred-Scheel-Stiftung, Deutsche Krebshilfe, the NIH Specialized Programs of Research Excellence Grant #CA62924, the Lustgarten Foundation for Pancreatic Cancer Research, and Ciphergen Biosystems, Inc.	Not mentioned	Yes	Prospective	Serum	Prior to cyst puncture by Surgery	1997	2002	PDAC	Yes	4	Novel	m/z 3760 & m/z 4053 & m/z 5884 & m/z 6081	Multi-marker panel	No	PDAC vs Benign	60	30	30			64.1	Histopathology	No	T3N1Mx n=46, T3N0Mx n=5, T2N1Mx n=3, T1N1Mx n=1, and T1N0Mx n=18	No																	26	Pancreatitis
#750	PMID: 14871961	Serum Diagnosis of Pancreatic Adenocarcinoma Using Surface-Enhanced Laser Desorption and Ionization Mass Spectrometry	Michael Goggins	mgoggins@jhmi.edu.	USA	Mildred-Scheel-Stiftung, Deutsche Krebshilfe, the NIH Specialized Programs of Research Excellence Grant #CA62924, the Lustgarten Foundation for Pancreatic Cancer Research, and Ciphergen Biosystems, Inc.	Not mentioned	Yes	Prospective	Serum	Prior to cyst puncture by Surgery	1997	2002	PDAC	Yes	5	CA19-9	CA19-9 & m/z 3760 & m/z 4053 & m/z 5884 & m/z 6081	Multi-marker panel	No	PDAC vs Benign	60	30	30			64.1	Histopathology	No	T3N1Mx n=46, T3N0Mx n=5, T2N1Mx n=3, T1N1Mx n=1, and T1N0Mx n=19	No																	26	Pancreatitis
#750	PMID: 14871961	Serum Diagnosis of Pancreatic Adenocarcinoma Using Surface-Enhanced Laser Desorption and Ionization Mass Spectrometry	Michael Goggins	mgoggins@jhmi.edu.	USA	Mildred-Scheel-Stiftung, Deutsche Krebshilfe, the NIH Specialized Programs of Research Excellence Grant #CA62924, the Lustgarten Foundation for Pancreatic Cancer Research, and Ciphergen Biosystems, Inc.	Not mentioned	Yes	Prospective	Serum	Prior to cyst puncture by Surgery	1997	2002	PDAC	Yes	2	Novel	m/z 6093 & m/z 7463	Multi-marker panel	No	PDAC vs Benign	60	30	30			64.1	Histopathology	No	T3N1Mx n=46, T3N0Mx n=5, T2N1Mx n=3, T1N1Mx n=1, and T1N0Mx n=20	No																	26	Pancreatitis
#750	PMID: 14871961	Serum Diagnosis of Pancreatic Adenocarcinoma Using Surface-Enhanced Laser Desorption and Ionization Mass Spectrometry	Michael Goggins	mgoggins@jhmi.edu.	USA	Mildred-Scheel-Stiftung, Deutsche Krebshilfe, the NIH Specialized Programs of Research Excellence Grant #CA62924, the Lustgarten Foundation for Pancreatic Cancer Research, and Ciphergen Biosystems, Inc.	Not mentioned	Yes	Prospective	Serum	Prior to cyst puncture by Surgery	1997	2002	PDAC	Yes	3	CA19-9	CA19-9 & m/z 6093 & m/z 7463	Multi-marker panel	No	PDAC vs Benign	60	30	30			64.1	Histopathology	No	T3N1Mx n=46, T3N0Mx n=5, T2N1Mx n=3, T1N1Mx n=1, and T1N0Mx n=21	No																	26	Pancreatitis
#4874	PMID: 16288055	Possible detection of pancreatic cancer by plasma protein profiling	Tesshi Yamada	tyamada@ncc.go.jp.	Japan	‘‘Third Term Comprehensive Control Research for Cancer’’ from the Ministry of Health, Labor and Welfare; ‘‘Program for Promotion of Fundamental Studies in Health Sciences’’ of the National Institute of Biomedical Innovation of Japan; and Foundation for the Promotion of Cancer Research resident fellowship to Y. Hayashida (patent pending in Japan, no. 2005-070512).	Not mentioned	Yes	Prospective	Plasma	No details given	2002-08-01	2003-10-01	PDAC	Yes	1	Novel	m/z 17272	Single marker	No	PDAC vs Healthy	71	37	34			61.3		No	Stage I (1), Stage II (6), Stage III (10), Stage IV (54)	Unsure		71	33	38			62.1
#4874	PMID: 16288055	Possible detection of pancreatic cancer by plasma protein profiling	Tesshi Yamada	tyamada@ncc.go.jp.	Japan	‘‘Third Term Comprehensive Control Research for Cancer’’ from the Ministry of Health, Labor and Welfare; ‘‘Program for Promotion of Fundamental Studies in Health Sciences’’ of the National Institute of Biomedical Innovation of Japan; and Foundation for the Promotion of Cancer Research resident fellowship to Y. Hayashida (patent pending in Japan, no. 2005-070512).	Not mentioned	Yes	Prospective	Plasma	No details given	2002-08-01	2003-10-01	PDAC	Yes	1	Novel	m/z 8766	Single marker	No	PDAC vs Healthy	71	37	34			61.3		No	Stage I (1), Stage II (6), Stage III (10), Stage IV (54)	Unsure		71	33	38			62.1
#4874	PMID: 16288055	Possible detection of pancreatic cancer by plasma protein profiling	Tesshi Yamada	tyamada@ncc.go.jp.	Japan	‘‘Third Term Comprehensive Control Research for Cancer’’ from the Ministry of Health, Labor and Welfare; ‘‘Program for Promotion of Fundamental Studies in Health Sciences’’ of the National Institute of Biomedical Innovation of Japan; and Foundation for the Promotion of Cancer Research resident fellowship to Y. Hayashida (patent pending in Japan, no. 2005-070512).	Not mentioned	Yes	Prospective	Plasma	No details given	2002-08-01	2003-10-01	PDAC	Yes	1	Novel	m/z 28080	Single marker	No	PDAC vs Healthy	71	37	34			61.3		No	Stage I (1), Stage II (6), Stage III (10), Stage IV (54)	Unsure		71	33	38			62.1
#4874	PMID: 16288055	Possible detection of pancreatic cancer by plasma protein profiling	Tesshi Yamada	tyamada@ncc.go.jp.	Japan	‘‘Third Term Comprehensive Control Research for Cancer’’ from the Ministry of Health, Labor and Welfare; ‘‘Program for Promotion of Fundamental Studies in Health Sciences’’ of the National Institute of Biomedical Innovation of Japan; and Foundation for the Promotion of Cancer Research resident fellowship to Y. Hayashida (patent pending in Japan, no. 2005-070512).	Not mentioned	Yes	Prospective	Plasma	No details given	2002-08-01	2003-10-01	PDAC	Yes	1	Novel	m/z 14779	Single marker	No	PDAC vs Healthy	71	37	34			61.3		No	Stage I (1), Stage II (6), Stage III (10), Stage IV (54)	Unsure		71	33	38			62.1
#4874	PMID: 16288055	Possible detection of pancreatic cancer by plasma protein profiling	Tesshi Yamada	tyamada@ncc.go.jp.	Japan	‘‘Third Term Comprehensive Control Research for Cancer’’ from the Ministry of Health, Labor and Welfare; ‘‘Program for Promotion of Fundamental Studies in Health Sciences’’ of the National Institute of Biomedical Innovation of Japan; and Foundation for the Promotion of Cancer Research resident fellowship to Y. Hayashida (patent pending in Japan, no. 2005-070512).	Not mentioned	Yes	Prospective	Plasma	No details given	2002-08-01	2003-10-01	PDAC	Yes	4	Novel	m/z 17272 & m/z 8766 & m/z 28080 & m/z 14779	Multi-marker panel	No	PDAC vs Healthy	71	37	34			61.3		No	Stage I (1), Stage II (6), Stage III (10), Stage IV (54)	Unsure		71	33	38			62.1
#4874	PMID: 16288055	Possible detection of pancreatic cancer by plasma protein profiling	Tesshi Yamada	tyamada@ncc.go.jp.	Japan	‘‘Third Term Comprehensive Control Research for Cancer’’ from the Ministry of Health, Labor and Welfare; ‘‘Program for Promotion of Fundamental Studies in Health Sciences’’ of the National Institute of Biomedical Innovation of Japan; and Foundation for the Promotion of Cancer Research resident fellowship to Y. Hayashida (patent pending in Japan, no. 2005-070512).	Not mentioned	Yes	Prospective	Plasma	No details given	2002-08-01	2003-10-01	PDAC	Yes	1	Novel	m/z 17272	Single marker	No	PDAC vs Healthy	33	18	15			62		No	Stage I (1), Stage II (4), Stage III (1), Stage IV (27)	Unsure		45	24	21			63.2
#4874	PMID: 16288055	Possible detection of pancreatic cancer by plasma protein profiling	Tesshi Yamada	tyamada@ncc.go.jp.	Japan	‘‘Third Term Comprehensive Control Research for Cancer’’ from the Ministry of Health, Labor and Welfare; ‘‘Program for Promotion of Fundamental Studies in Health Sciences’’ of the National Institute of Biomedical Innovation of Japan; and Foundation for the Promotion of Cancer Research resident fellowship to Y. Hayashida (patent pending in Japan, no. 2005-070512).	Not mentioned	Yes	Prospective	Plasma	No details given	2002-08-01	2003-10-01	PDAC	Yes	1	Novel	m/z 8766	Single marker	No	PDAC vs Healthy	33	18	15			62		No	Stage I (1), Stage II (4), Stage III (1), Stage IV (27)	Unsure		45	24	21			63.2
#4874	PMID: 16288055	Possible detection of pancreatic cancer by plasma protein profiling	Tesshi Yamada	tyamada@ncc.go.jp.	Japan	‘‘Third Term Comprehensive Control Research for Cancer’’ from the Ministry of Health, Labor and Welfare; ‘‘Program for Promotion of Fundamental Studies in Health Sciences’’ of the National Institute of Biomedical Innovation of Japan; and Foundation for the Promotion of Cancer Research resident fellowship to Y. Hayashida (patent pending in Japan, no. 2005-070512).	Not mentioned	Yes	Prospective	Plasma	No details given	2002-08-01	2003-10-01	PDAC	Yes	1	Novel	m/z 28080	Single marker	No	PDAC vs Healthy	33	18	15			62		No	Stage I (1), Stage II (4), Stage III (1), Stage IV (27)	Unsure		45	24	21			63.2
#4874	PMID: 16288055	Possible detection of pancreatic cancer by plasma protein profiling	Tesshi Yamada	tyamada@ncc.go.jp.	Japan	‘‘Third Term Comprehensive Control Research for Cancer’’ from the Ministry of Health, Labor and Welfare; ‘‘Program for Promotion of Fundamental Studies in Health Sciences’’ of the National Institute of Biomedical Innovation of Japan; and Foundation for the Promotion of Cancer Research resident fellowship to Y. Hayashida (patent pending in Japan, no. 2005-070512).	Not mentioned	Yes	Prospective	Plasma	No details given	2002-08-01	2003-10-01	PDAC	Yes	1	Novel	m/z 14779	Single marker	No	PDAC vs Healthy	33	18	15			62		No	Stage I (1), Stage II (4), Stage III (1), Stage IV (27)	Unsure		45	24	21			63.2
#4874	PMID: 16288055	Possible detection of pancreatic cancer by plasma protein profiling	Tesshi Yamada	tyamada@ncc.go.jp.	Japan	‘‘Third Term Comprehensive Control Research for Cancer’’ from the Ministry of Health, Labor and Welfare; ‘‘Program for Promotion of Fundamental Studies in Health Sciences’’ of the National Institute of Biomedical Innovation of Japan; and Foundation for the Promotion of Cancer Research resident fellowship to Y. Hayashida (patent pending in Japan, no. 2005-070512).	Not mentioned	Yes	Prospective	Plasma	No details given	2002-08-01	2003-10-01	PDAC	Yes	4	Novel	m/z 17272 & m/z 8766 & m/z 28080 & m/z 14779	Multi-marker panel	No	PDAC vs Healthy	33	18	15			62		No	Stage I (1), Stage II (4), Stage III (1), Stage IV (27)	Unsure		45	24	21			63.2
#4874	PMID: 16288055	Possible detection of pancreatic cancer by plasma protein profiling	Tesshi Yamada	tyamada@ncc.go.jp.	Japan	‘‘Third Term Comprehensive Control Research for Cancer’’ from the Ministry of Health, Labor and Welfare; ‘‘Program for Promotion of Fundamental Studies in Health Sciences’’ of the National Institute of Biomedical Innovation of Japan; and Foundation for the Promotion of Cancer Research resident fellowship to Y. Hayashida (patent pending in Japan, no. 2005-070512).	Not mentioned	Yes	Prospective	Plasma	No details given	2002-08-01	2003-10-01	PDAC	Yes	1	CA19-9	CA19-9	Single marker	No	PDAC vs Healthy	29							No		Unsure		39
#4874	PMID: 16288055	Possible detection of pancreatic cancer by plasma protein profiling	Tesshi Yamada	tyamada@ncc.go.jp.	Japan	‘‘Third Term Comprehensive Control Research for Cancer’’ from the Ministry of Health, Labor and Welfare; ‘‘Program for Promotion of Fundamental Studies in Health Sciences’’ of the National Institute of Biomedical Innovation of Japan; and Foundation for the Promotion of Cancer Research resident fellowship to Y. Hayashida (patent pending in Japan, no. 2005-070512).	Not mentioned	Yes	Prospective	Plasma	No details given	2002-08-01	2003-10-01	PDAC	Yes	5	CA19-9	CA19-9 & m/z 17272 & m/z 8766 & m/z 28080 & m/z 14779	Multi-marker panel	No	PDAC vs Healthy	29							No		Unsure		39
#1909	PMID: 24096486	MicroRNA-10b enhances pancreatic cancer cell invasion by suppressing TIP30 expression and promoting EGF and TGF-Î² actions	M Korc	mkorc@iupui.edu	USA	The work was supported, in part, by an NIH grant R37-CA-075059 to M K.	None Declared	Yes	Retrospective	Plasma	No details given			PDAC	No	1	Novel	miR-10b	Single marker	No	PDAC vs Healthy	17									Unsure		20
#472	PMID: 26808421	Improved pancreatic adenocarcinoma diagnosis in jaundiced and non-jaundiced pancreatic adenocarcinoma patients through the combination of routine clinical markers associated to pancreatic adenocarcinoma Pathophysiology	Rosa Peracaula	rosa.peracaula@udg.edu	Spain	Spanish Ministry of Science and Innovation [grant BIO 2010-16922 to RP] and Instituto de Salud Carlos III, Spain (FIS Grant No. PI08621 to JF)	These results are included in a Spanish Patent: P 2014 31022.	Yes	Prospective	Serum	Prior to cyst puncture by Surgery	2007	2012	PDAC	Yes	1	CA19-9	CA19-9	Single marker	No	PDAC vs Benign	47	28	19			64.1	Histopathology	No	Stage IB (1), Stage IIA (4), Stage IIB (22), Stage III (8), Stage IV (12)	Unsure									20	Chronic Pancreatitis	16	4			56.3
#472	PMID: 26808421	Improved pancreatic adenocarcinoma diagnosis in jaundiced and non-jaundiced pancreatic adenocarcinoma patients through the combination of routine clinical markers associated to pancreatic adenocarcinoma Pathophysiology	Rosa Peracaula	rosa.peracaula@udg.edu	Spain	Spanish Ministry of Science and Innovation [grant BIO 2010-16922 to RP] and Instituto de Salud Carlos III, Spain (FIS Grant No. PI08621 to JF)	These results are included in a Spanish Patent: P 2014 31022.	Yes	Prospective	Serum	Prior to cyst puncture by Surgery	2007	2012	PDAC	Yes	1	Novel	C-reactive protein (CRP)	Single marker	No	PDAC vs Benign	47	28	19			64.1	Histopathology	No	Stage IB (1), Stage IIA (4), Stage IIB (22), Stage III (8), Stage IV (12)	Unsure									20	Chronic Pancreatitis	16	4			56.3
#472	PMID: 26808421	Improved pancreatic adenocarcinoma diagnosis in jaundiced and non-jaundiced pancreatic adenocarcinoma patients through the combination of routine clinical markers associated to pancreatic adenocarcinoma Pathophysiology	Rosa Peracaula	rosa.peracaula@udg.edu	Spain	Spanish Ministry of Science and Innovation [grant BIO 2010-16922 to RP] and Instituto de Salud Carlos III, Spain (FIS Grant No. PI08621 to JF)	These results are included in a Spanish Patent: P 2014 31022.	Yes	Prospective	Serum	Prior to cyst puncture by Surgery	2007	2012	PDAC	Yes	1	Novel	C-reactive protein (CRP)	Single marker	No	PDAC vs Healthy	47	28	19			64.1	Histopathology	No	Stage IB (1), Stage IIA (4), Stage IIB (22), Stage III (8), Stage IV (12)	Unsure		15	4	11			60.9
#472	PMID: 26808421	Improved pancreatic adenocarcinoma diagnosis in jaundiced and non-jaundiced pancreatic adenocarcinoma patients through the combination of routine clinical markers associated to pancreatic adenocarcinoma Pathophysiology	Rosa Peracaula	rosa.peracaula@udg.edu	Spain	Spanish Ministry of Science and Innovation [grant BIO 2010-16922 to RP] and Instituto de Salud Carlos III, Spain (FIS Grant No. PI08621 to JF)	These results are included in a Spanish Patent: P 2014 31022.	Yes	Prospective	Serum	Prior to cyst puncture by Surgery	2007	2012	PDAC	Yes	1	Novel	Albumin	Single marker	No	PDAC vs Benign	47	28	19			64.1	Histopathology	No	Stage IB (1), Stage IIA (4), Stage IIB (22), Stage III (8), Stage IV (12)	Unsure									20	Chronic Pancreatitis	16	4			56.3
#472	PMID: 26808421	Improved pancreatic adenocarcinoma diagnosis in jaundiced and non-jaundiced pancreatic adenocarcinoma patients through the combination of routine clinical markers associated to pancreatic adenocarcinoma Pathophysiology	Rosa Peracaula	rosa.peracaula@udg.edu	Spain	Spanish Ministry of Science and Innovation [grant BIO 2010-16922 to RP] and Instituto de Salud Carlos III, Spain (FIS Grant No. PI08621 to JF)	These results are included in a Spanish Patent: P 2014 31022.	Yes	Prospective	Serum	Prior to cyst puncture by Surgery	2007	2012	PDAC	Yes	1	Novel	Albumin	Single marker	No	PDAC vs Healthy	47	28	19			64.1	Histopathology	No	Stage IB (1), Stage IIA (4), Stage IIB (22), Stage III (8), Stage IV (12)	Unsure		15	4	11			60.9
#472	PMID: 26808421	Improved pancreatic adenocarcinoma diagnosis in jaundiced and non-jaundiced pancreatic adenocarcinoma patients through the combination of routine clinical markers associated to pancreatic adenocarcinoma Pathophysiology	Rosa Peracaula	rosa.peracaula@udg.edu	Spain	Spanish Ministry of Science and Innovation [grant BIO 2010-16922 to RP] and Instituto de Salud Carlos III, Spain (FIS Grant No. PI08621 to JF)	These results are included in a Spanish Patent: P 2014 31022.	Yes	Prospective	Serum	Prior to cyst puncture by Surgery	2007	2012	PDAC	Yes	1	Novel	Insulin growth factor-1 (IGF-1)	Single marker	No	PDAC vs Healthy	47	28	19			64.1	Histopathology	No	Stage IB (1), Stage IIA (4), Stage IIB (22), Stage III (8), Stage IV (12)	Unsure		15	4	11			60.9
#472	PMID: 26808421	Improved pancreatic adenocarcinoma diagnosis in jaundiced and non-jaundiced pancreatic adenocarcinoma patients through the combination of routine clinical markers associated to pancreatic adenocarcinoma Pathophysiology	Rosa Peracaula	rosa.peracaula@udg.edu	Spain	Spanish Ministry of Science and Innovation [grant BIO 2010-16922 to RP] and Instituto de Salud Carlos III, Spain (FIS Grant No. PI08621 to JF)	These results are included in a Spanish Patent: P 2014 31022.	Yes	Prospective	Serum	Prior to cyst puncture by Surgery	2007	2012	PDAC	Yes	1	Novel	Insulin growth factor-1 (IGF-1)	Single marker	No	PDAC vs Benign	47	28	19			64.1	Histopathology	No	Stage IB (1), Stage IIA (4), Stage IIB (22), Stage III (8), Stage IV (12)	Unsure									20	Chronic Pancreatitis	16	4			56.3
#472	PMID: 26808421	Improved pancreatic adenocarcinoma diagnosis in jaundiced and non-jaundiced pancreatic adenocarcinoma patients through the combination of routine clinical markers associated to pancreatic adenocarcinoma Pathophysiology	Rosa Peracaula	rosa.peracaula@udg.edu	Spain	Spanish Ministry of Science and Innovation [grant BIO 2010-16922 to RP] and Instituto de Salud Carlos III, Spain (FIS Grant No. PI08621 to JF)	These results are included in a Spanish Patent: P 2014 31022.	Yes	Prospective	Serum	Prior to cyst puncture by Surgery	2007	2012	PDAC	Yes	1	Novel	Insulin-like growth factor binding protein-3 (IGFBP3)	Single marker	No	PDAC vs Healthy	47	28	19			64.1	Histopathology	No	Stage IB (1), Stage IIA (4), Stage IIB (22), Stage III (8), Stage IV (12)	Unsure		15	4	11			60.9
#472	PMID: 26808421	Improved pancreatic adenocarcinoma diagnosis in jaundiced and non-jaundiced pancreatic adenocarcinoma patients through the combination of routine clinical markers associated to pancreatic adenocarcinoma Pathophysiology	Rosa Peracaula	rosa.peracaula@udg.edu	Spain	Spanish Ministry of Science and Innovation [grant BIO 2010-16922 to RP] and Instituto de Salud Carlos III, Spain (FIS Grant No. PI08621 to JF)	These results are included in a Spanish Patent: P 2014 31022.	Yes	Prospective	Serum	Prior to cyst puncture by Surgery	2007	2012	PDAC	Yes	1	Novel	Insulin-like growth factor binding protein-3 (IGFBP3)	Single marker	No	PDAC vs Benign	47	28	19			64.1	Histopathology	No	Stage IB (1), Stage IIA (4), Stage IIB (22), Stage III (8), Stage IV (12)	Unsure									20	Chronic Pancreatitis	16	4			56.3
#472	PMID: 26808421	Improved pancreatic adenocarcinoma diagnosis in jaundiced and non-jaundiced pancreatic adenocarcinoma patients through the combination of routine clinical markers associated to pancreatic adenocarcinoma Pathophysiology	Rosa Peracaula	rosa.peracaula@udg.edu	Spain	Spanish Ministry of Science and Innovation [grant BIO 2010-16922 to RP] and Instituto de Salud Carlos III, Spain (FIS Grant No. PI08621 to JF)	These results are included in a Spanish Patent: P 2014 31022.	Yes	Prospective	Serum	Prior to cyst puncture by Surgery	2007	2012	PDAC	Yes	2	CA19-9	CA19-9 & CEA	Multi-marker panel	No	PDAC vs Benign	47	28	19			64.1	Histopathology	No	Stage IB (1), Stage IIA (4), Stage IIB (22), Stage III (8), Stage IV (12)	Unsure									20	Chronic Pancreatitis	16	4			56.3
#472	PMID: 26808421	Improved pancreatic adenocarcinoma diagnosis in jaundiced and non-jaundiced pancreatic adenocarcinoma patients through the combination of routine clinical markers associated to pancreatic adenocarcinoma Pathophysiology	Rosa Peracaula	rosa.peracaula@udg.edu	Spain	Spanish Ministry of Science and Innovation [grant BIO 2010-16922 to RP] and Instituto de Salud Carlos III, Spain (FIS Grant No. PI08621 to JF)	These results are included in a Spanish Patent: P 2014 31022.	Yes	Prospective	Serum	Prior to cyst puncture by Surgery	2007	2012	PDAC	Yes	2	CA19-9	CA19-9 & Insulin growth factor-1 (IGF-1)	Multi-marker panel	No	PDAC vs Benign	47	28	19			64.1	Histopathology	No	Stage IB (1), Stage IIA (4), Stage IIB (22), Stage III (8), Stage IV (12)	Unsure									20	Chronic Pancreatitis	16	4			56.3
#472	PMID: 26808421	Improved pancreatic adenocarcinoma diagnosis in jaundiced and non-jaundiced pancreatic adenocarcinoma patients through the combination of routine clinical markers associated to pancreatic adenocarcinoma Pathophysiology	Rosa Peracaula	rosa.peracaula@udg.edu	Spain	Spanish Ministry of Science and Innovation [grant BIO 2010-16922 to RP] and Instituto de Salud Carlos III, Spain (FIS Grant No. PI08621 to JF)	These results are included in a Spanish Patent: P 2014 31022.	Yes	Prospective	Serum	Prior to cyst puncture by Surgery	2007	2012	PDAC	Yes	2	CA19-9	CA19-9 & Albumin	Multi-marker panel	No	PDAC vs Benign	47	28	19			64.1	Histopathology	No	Stage IB (1), Stage IIA (4), Stage IIB (22), Stage III (8), Stage IV (12)	Unsure									20	Chronic Pancreatitis	16	4			56.3
#472	PMID: 26808421	Improved pancreatic adenocarcinoma diagnosis in jaundiced and non-jaundiced pancreatic adenocarcinoma patients through the combination of routine clinical markers associated to pancreatic adenocarcinoma Pathophysiology	Rosa Peracaula	rosa.peracaula@udg.edu	Spain	Spanish Ministry of Science and Innovation [grant BIO 2010-16922 to RP] and Instituto de Salud Carlos III, Spain (FIS Grant No. PI08621 to JF)	These results are included in a Spanish Patent: P 2014 31022.	Yes	Prospective	Serum	Prior to cyst puncture by Surgery	2007	2012	PDAC	Yes	2	CA19-9	CA19-9 & C-reactive protein (CRP)	Multi-marker panel	No	PDAC vs Benign	47	28	19			64.1	Histopathology	No	Stage IB (1), Stage IIA (4), Stage IIB (22), Stage III (8), Stage IV (12)	Unsure									20	Chronic Pancreatitis	16	4			56.3
#472	PMID: 26808421	Improved pancreatic adenocarcinoma diagnosis in jaundiced and non-jaundiced pancreatic adenocarcinoma patients through the combination of routine clinical markers associated to pancreatic adenocarcinoma Pathophysiology	Rosa Peracaula	rosa.peracaula@udg.edu	Spain	Spanish Ministry of Science and Innovation [grant BIO 2010-16922 to RP] and Instituto de Salud Carlos III, Spain (FIS Grant No. PI08621 to JF)	These results are included in a Spanish Patent: P 2014 31022.	Yes	Prospective	Serum	Prior to cyst puncture by Surgery	2007	2012	PDAC	Yes	3	CA19-9	CA19-9 & Insulin growth factor-1 (IGF-1) & CEA	Multi-marker panel	No	PDAC vs Benign	47	28	19			64.1	Histopathology	No	Stage IB (1), Stage IIA (4), Stage IIB (22), Stage III (8), Stage IV (12)	Unsure									20	Chronic Pancreatitis	16	4			56.3
#472	PMID: 26808421	Improved pancreatic adenocarcinoma diagnosis in jaundiced and non-jaundiced pancreatic adenocarcinoma patients through the combination of routine clinical markers associated to pancreatic adenocarcinoma Pathophysiology	Rosa Peracaula	rosa.peracaula@udg.edu	Spain	Spanish Ministry of Science and Innovation [grant BIO 2010-16922 to RP] and Instituto de Salud Carlos III, Spain (FIS Grant No. PI08621 to JF)	These results are included in a Spanish Patent: P 2014 31022.	Yes	Prospective	Serum	Prior to cyst puncture by Surgery	2007	2012	PDAC	Yes	3	CA19-9	CA19-9 & Insulin growth factor-1 (IGF-1) & Albumin	Multi-marker panel	No	PDAC vs Benign	47	28	19			64.1	Histopathology	No	Stage IB (1), Stage IIA (4), Stage IIB (22), Stage III (8), Stage IV (12)	Unsure									20	Chronic Pancreatitis	16	4			56.3
#472	PMID: 26808421	Improved pancreatic adenocarcinoma diagnosis in jaundiced and non-jaundiced pancreatic adenocarcinoma patients through the combination of routine clinical markers associated to pancreatic adenocarcinoma Pathophysiology	Rosa Peracaula	rosa.peracaula@udg.edu	Spain	Spanish Ministry of Science and Innovation [grant BIO 2010-16922 to RP] and Instituto de Salud Carlos III, Spain (FIS Grant No. PI08621 to JF)	These results are included in a Spanish Patent: P 2014 31022.	Yes	Prospective	Serum	Prior to cyst puncture by Surgery	2007	2012	PDAC	Yes	4	CA19-9	CA19-9 & Insulin growth factor-1 (IGF-1) & CEA & Albumin	Multi-marker panel	No	PDAC vs Benign	47	28	19			64.1	Histopathology	No	Stage IB (1), Stage IIA (4), Stage IIB (22), Stage III (8), Stage IV (12)	Unsure									20	Chronic Pancreatitis	16	4			56.3
#472	PMID: 26808421	Improved pancreatic adenocarcinoma diagnosis in jaundiced and non-jaundiced pancreatic adenocarcinoma patients through the combination of routine clinical markers associated to pancreatic adenocarcinoma Pathophysiology	Rosa Peracaula	rosa.peracaula@udg.edu	Spain	Spanish Ministry of Science and Innovation [grant BIO 2010-16922 to RP] and Instituto de Salud Carlos III, Spain (FIS Grant No. PI08621 to JF)	These results are included in a Spanish Patent: P 2014 31022.	Yes	Prospective	Serum	Prior to cyst puncture by Surgery	2007	2012	PDAC	Yes	4	CA19-9	CA19-9 & Insulin growth factor-1 (IGF-1) & CEA & C-reactive protein (CRP)	Multi-marker panel	No	PDAC vs Benign	47	28	19			64.1	Histopathology	No	Stage IB (1), Stage IIA (4), Stage IIB (22), Stage III (8), Stage IV (12)	Unsure									20	Chronic Pancreatitis	16	4			56.3
#472	PMID: 26808421	Improved pancreatic adenocarcinoma diagnosis in jaundiced and non-jaundiced pancreatic adenocarcinoma patients through the combination of routine clinical markers associated to pancreatic adenocarcinoma Pathophysiology	Rosa Peracaula	rosa.peracaula@udg.edu	Spain	Spanish Ministry of Science and Innovation [grant BIO 2010-16922 to RP] and Instituto de Salud Carlos III, Spain (FIS Grant No. PI08621 to JF)	These results are included in a Spanish Patent: P 2014 31022.	Yes	Prospective	Serum	Prior to cyst puncture by Surgery	2007	2012	PDAC	Yes	5	CA19-9	CA19-9 & Insulin growth factor-1 (IGF-1) & CEA & C-reactive protein (CRP) & Albumin	Multi-marker panel	No	PDAC vs Benign	47	28	19			64.1	Histopathology	No	Stage IB (1), Stage IIA (4), Stage IIB (22), Stage III (8), Stage IV (12)	Unsure									20	Chronic Pancreatitis	16	4			56.3
#456	PMID: 26808421	Improved diagnostic accuracy of pancreatic diseases with a combination of various novel serum biomarkers--case control study from Manipal Teaching Hospital, Pokhara, Nepal	Mohammad Shamim Farooqui	drfrqms@aol.com	Nepal	Not given	Not mentioned	Yes	Prospective	Serum	No details given	2010-01-01	2011-12-01	PDAC	Yes	1	CA19-9	CA19-9	Single marker	No	PDAC vs Healthy	95	59	36	54-90		72	Histology	No	Stage IA (4), Stage IB (8), Stage IIA (9), Stage IIB (27), Stage III (21), Stage IV (26)	Unsure		170	102	68	34-86		65
#456	PMID: 26808421	Improved diagnostic accuracy of pancreatic diseases with a combination of various novel serum biomarkers--case control study from Manipal Teaching Hospital, Pokhara, Nepal	Mohammad Shamim Farooqui	drfrqms@aol.com	Nepal	Not given	Not mentioned	Yes	Prospective	Serum	No details given	2010-01-01	2011-12-01	PDAC	Yes	1	Novel	Haptoglobin	Single marker	No	PDAC vs Healthy	95	59	36	54-91		72	Histology	No	Stage IA (4), Stage IB (8), Stage IIA (9), Stage IIB (27), Stage III (21), Stage IV (26)	Unsure		170	102	68	34-87		65
#456	PMID: 26808421	Improved diagnostic accuracy of pancreatic diseases with a combination of various novel serum biomarkers--case control study from Manipal Teaching Hospital, Pokhara, Nepal	Mohammad Shamim Farooqui	drfrqms@aol.com	Nepal	Not given	Not mentioned	Yes	Prospective	Serum	No details given	2010-01-01	2011-12-01	PDAC	Yes	1	Novel	Amyloid A	Single marker	No	PDAC vs Healthy	95	59	36	54-92		72	Histology	No	Stage IA (4), Stage IB (8), Stage IIA (9), Stage IIB (27), Stage III (21), Stage IV (26)	Unsure		170	102	68	34-88		65
#2309		Elevated serum CD26 level is associated with metastasis and post-operation survival in pancreatic cancer patients	Chunyi Hao	haochunyi@bjmu.edu.cn.	China	This study was supported by International Science & Technology Cooperation Program of China (approval No. 2013DFG32720); the Capital Health Research and Development of Special (approval No. 2016-2-2151); National Natural Science Foundation of China (approval No. 81272765, 61571437, 61372028, and 81441071); Capital Characteristic Clinical Application Research (approval No. Z161100000516065).	None Declared	Yes	Prospective	Serum	Prior to cyst puncture by Surgery	2010-05-01	2012-06-01	PDAC	No	1	Novel	soluble CD26 (sCD26)	Single marker	Yes	PDAC vs Healthy	92	52	40	28-82				No	Stage I & II (66), Stage III & IV (26)	No		86	46	40	18-78
#2309		Elevated serum CD26 level is associated with metastasis and post-operation survival in pancreatic cancer patients	Chunyi Hao	haochunyi@bjmu.edu.cn.	China	This study was supported by International Science & Technology Cooperation Program of China (approval No. 2013DFG32720); the Capital Health Research and Development of Special (approval No. 2016-2-2151); National Natural Science Foundation of China (approval No. 81272765, 61571437, 61372028, and 81441071); Capital Characteristic Clinical Application Research (approval No. Z161100000516065).	None Declared	Yes	Prospective	Serum	After cyst puncture by Surgery	2010-05-01	2012-06-01	PDAC	No	1	Novel	soluble CD26 (sCD26)	Single marker	Yes	PDAC vs Healthy	49							No		Yes	Surgery	86	46	40	18-79
#1412		Early diagnosis of pancreatic cancer by determining genetic and serological tumoral markers	Mădălina Ilie	drmadalina@gmail.com	Romania	Not given	None Declared	Yes	Prospective	Plasma	No details given	2015-01-01	2016-01-01	PDAC	Yes	1	Novel	Mesothelin	Single marker	No	PDAC vs Benign	34	23	11			66.02		No		Unsure									20	Chronic Pancreatitis	17	3			51.05
#1412		Early diagnosis of pancreatic cancer by determining genetic and serological tumoral markers	Mădălina Ilie	drmadalina@gmail.com	Romania	Not given	None Declared	Yes	Prospective	Plasma	No details given	2015-01-01	2016-01-01	PDAC	Yes	1	Novel	MiR-10b	Single marker	No	PDAC vs Benign	34	23	11			66.02		No		Unsure									20	Chronic Pancreatitis	17	3			51.05
#555	PMID: 28578701	Distinct pathophysiological cytokine profiles for discrimination between autoimmune pancreatitis, chronic pancreatitis, and pancreatic ductal adenocarcinoma	Klaus Felix	klaus.felix@med.uni‑heidelberg.de	Germany	M.M.G. was supported by the German Research Foundation (GA 1818/2-1).	None Declared	Yes	Retrospective	Serum	Prior to cyst puncture by Surgery	2001	2009	PDAC	Yes	1	Novel	IL-1β	Single marker	No	PDAC vs Benign	27	13	14		61		Histology												29	Autoimmune Pancreatitis	25	4
#555	PMID: 28578701	Distinct pathophysiological cytokine profiles for discrimination between autoimmune pancreatitis, chronic pancreatitis, and pancreatic ductal adenocarcinoma	Klaus Felix	klaus.felix@med.uni‑heidelberg.de	Germany	M.M.G. was supported by the German Research Foundation (GA 1818/2-1).	None Declared	Yes	Retrospective	Serum	Prior to cyst puncture by Surgery	2001	2009	PDAC	Yes	1	Novel	IL-7	Single marker	No	PDAC vs Benign	27	13	14		61		Histology												29	Autoimmune Pancreatitis	25	4
#555	PMID: 28578701	Distinct pathophysiological cytokine profiles for discrimination between autoimmune pancreatitis, chronic pancreatitis, and pancreatic ductal adenocarcinoma	Klaus Felix	klaus.felix@med.uni‑heidelberg.de	Germany	M.M.G. was supported by the German Research Foundation (GA 1818/2-1).	None Declared	Yes	Retrospective	Serum	Prior to cyst puncture by Surgery	2001	2009	PDAC	Yes	1	Novel	IL-13	Single marker	No	PDAC vs Benign	27	13	14		61		Histology												29	Autoimmune Pancreatitis	25	4
#555	PMID: 28578701	Distinct pathophysiological cytokine profiles for discrimination between autoimmune pancreatitis, chronic pancreatitis, and pancreatic ductal adenocarcinoma	Klaus Felix	klaus.felix@med.uni‑heidelberg.de	Germany	M.M.G. was supported by the German Research Foundation (GA 1818/2-1).	None Declared	Yes	Retrospective	Serum	Prior to cyst puncture by Surgery	2001	2009	PDAC	Yes	1	Novel	Granulocyte colony-stimulating factor (G-CSF)	Single marker	No	PDAC vs Benign	27	13	14		61		Histology												29	Autoimmune Pancreatitis	25	4
#555	PMID: 28578701	Distinct pathophysiological cytokine profiles for discrimination between autoimmune pancreatitis, chronic pancreatitis, and pancreatic ductal adenocarcinoma	Klaus Felix	klaus.felix@med.uni‑heidelberg.de	Germany	M.M.G. was supported by the German Research Foundation (GA 1818/2-1).	None Declared	Yes	Retrospective	Serum	Prior to cyst puncture by Surgery	2001	2009	PDAC	Yes	2	Novel	Granulocyte colony-stimulating factor (G-CSF) & IL-7	Multi-marker panel	No	PDAC vs Benign	27	13	14		61		Histology												29	Autoimmune Pancreatitis	25	4
#6051	PMID: 16094523	Cytokine expression profile in human pancreatic carcinoma cells and in surgical specimens: implications for survival	Graziella Bellone	graziella.bellone@unito.it	Italy	This work was supported by a grant from MIUR (Rome, Italy) (ex-60%) to GE, and in part by a grant from the Piedmontese Regional Government (Regione Piemonte) to GB.	ET and AB are the recipients of an award from the Piedmontese Regional Government.	Yes	Prospective	Serum	Prior to cyst puncture by Surgery	1999	2002	PDAC	Yes	1	Novel	IL-8	Single marker	No	PDAC vs Healthy	65	37	28	50-87			Histopathologically or typical radiographic findings	No	Stage IIA (10), Stage IIB (6), Stage III (19), Stage IV (30)	No		30	13	17	24-65	40
#6051	PMID: 16094523	Cytokine expression profile in human pancreatic carcinoma cells and in surgical specimens: implications for survival	Graziella Bellone	graziella.bellone@unito.it	Italy	This work was supported by a grant from MIUR (Rome, Italy) (ex-60%) to GE, and in part by a grant from the Piedmontese Regional Government (Regione Piemonte) to GB.	ET and AB are the recipients of an award from the Piedmontese Regional Government.	Yes	Prospective	Serum	Prior to cyst puncture by Surgery	1999	2002	PDAC	Yes	1	Novel	IL-10	Single marker	No	PDAC vs Healthy	65	37	28	50-88			Histopathologically or typical radiographic findings	No	Stage IIA (10), Stage IIB (6), Stage III (19), Stage IV (30)	No		30	13	17	24-66	40
#6051	PMID: 16094523	Cytokine expression profile in human pancreatic carcinoma cells and in surgical specimens: implications for survival	Graziella Bellone	graziella.bellone@unito.it	Italy	This work was supported by a grant from MIUR (Rome, Italy) (ex-60%) to GE, and in part by a grant from the Piedmontese Regional Government (Regione Piemonte) to GB.	ET and AB are the recipients of an award from the Piedmontese Regional Government.	Yes	Prospective	Serum	Prior to cyst puncture by Surgery	1999	2002	PDAC	Yes	1	Novel	IL-12	Single marker	No	PDAC vs Healthy	65	37	28	50-89			Histopathologically or typical radiographic findings	No	Stage IIA (10), Stage IIB (6), Stage III (19), Stage IV (30)	No		30	13	17	24-67	40
#6051	PMID: 16094523	Cytokine expression profile in human pancreatic carcinoma cells and in surgical specimens: implications for survival	Graziella Bellone	graziella.bellone@unito.it	Italy	This work was supported by a grant from MIUR (Rome, Italy) (ex-60%) to GE, and in part by a grant from the Piedmontese Regional Government (Regione Piemonte) to GB.	ET and AB are the recipients of an award from the Piedmontese Regional Government.	Yes	Prospective	Serum	Prior to cyst puncture by Surgery	1999	2002	PDAC	Yes	1	Novel	IL-18	Single marker	No	PDAC vs Healthy	65	37	28	50-90			Histopathologically or typical radiographic findings	No	Stage IIA (10), Stage IIB (6), Stage III (19), Stage IV (30)	No		30	13	17	24-68	40
#6051	PMID: 16094523	Cytokine expression profile in human pancreatic carcinoma cells and in surgical specimens: implications for survival	Graziella Bellone	graziella.bellone@unito.it	Italy	This work was supported by a grant from MIUR (Rome, Italy) (ex-60%) to GE, and in part by a grant from the Piedmontese Regional Government (Regione Piemonte) to GB.	ET and AB are the recipients of an award from the Piedmontese Regional Government.	Yes	Prospective	Serum	Prior to cyst puncture by Surgery	1999	2002	PDAC	Yes	1	Novel	TGF-β1	Single marker	No	PDAC vs Healthy	65	37	28	50-91			Histopathologically or typical radiographic findings	No	Stage IIA (10), Stage IIB (6), Stage III (19), Stage IV (30)	No		30	13	17	24-69	40
#6051	PMID: 16094523	Cytokine expression profile in human pancreatic carcinoma cells and in surgical specimens: implications for survival	Graziella Bellone	graziella.bellone@unito.it	Italy	This work was supported by a grant from MIUR (Rome, Italy) (ex-60%) to GE, and in part by a grant from the Piedmontese Regional Government (Regione Piemonte) to GB.	ET and AB are the recipients of an award from the Piedmontese Regional Government.	Yes	Prospective	Serum	Prior to cyst puncture by Surgery	1999	2002	PDAC	Yes	1	Novel	TGF-β2	Single marker	No	PDAC vs Healthy	65	37	28	50-92			Histopathologically or typical radiographic findings	No	Stage IIA (10), Stage IIB (6), Stage III (19), Stage IV (30)	No		30	13	17	24-70	40
#6051	PMID: 16094523	Cytokine expression profile in human pancreatic carcinoma cells and in surgical specimens: implications for survival	Graziella Bellone	graziella.bellone@unito.it	Italy	This work was supported by a grant from MIUR (Rome, Italy) (ex-60%) to GE, and in part by a grant from the Piedmontese Regional Government (Regione Piemonte) to GB.	ET and AB are the recipients of an award from the Piedmontese Regional Government.	Yes	Prospective	Serum	Prior to cyst puncture by Surgery	1999	2002	PDAC	Yes	1	Novel	IL-1β	Single marker	No	PDAC vs Healthy	65	37	28	50-93			Histopathologically or typical radiographic findings	No	Stage IIA (10), Stage IIB (6), Stage III (19), Stage IV (30)	No		30	13	17	24-71	40
#6051	PMID: 16094523	Cytokine expression profile in human pancreatic carcinoma cells and in surgical specimens: implications for survival	Graziella Bellone	graziella.bellone@unito.it	Italy	This work was supported by a grant from MIUR (Rome, Italy) (ex-60%) to GE, and in part by a grant from the Piedmontese Regional Government (Regione Piemonte) to GB.	ET and AB are the recipients of an award from the Piedmontese Regional Government.	Yes	Prospective	Serum	Prior to cyst puncture by Surgery	1999	2002	PDAC	Yes	1	Novel	IL-13	Single marker	No	PDAC vs Healthy	65	37	28	50-94			Histopathologically or typical radiographic findings	No	Stage IIA (10), Stage IIB (6), Stage III (19), Stage IV (30)	No		30	13	17	24-72	40
#5797	PMID: 18665074	Serum vascular endothelial growth factor/soluble vascular endothelial growth factor receptor 1 ratio is an independent prognostic marker in pancreatic cancer	Jau-Min Wong	jmwong@ntu.edu.tw	Taiwan	National Science Council, Taiwan	Not mentioned	Yes	Prospective	Serum	After cyst puncture by FNA	1999-01-01	2006-12-01	PDAC	Yes	1	Novel	sVEGFR-1	Single marker	Yes	PDAC vs Healthy	92	46	46		65		Histology or Cytology	No	Stage I (11), Stage II (37), Stage III (2), Stage IV (42)	No		60	30	30		65		Sex-matched healthy volunteers in whom the absence of neoplastic disease was established by clinical history, physical examination, routine blood tests, urine and stool occult blood tests, chest x-ray examination, abdominal ultrasonography, and follow-up for more than 3 years.
#5797	PMID: 18665074	Serum vascular endothelial growth factor/soluble vascular endothelial growth factor receptor 1 ratio is an independent prognostic marker in pancreatic cancer	Jau-Min Wong	jmwong@ntu.edu.tw	Taiwan	National Science Council, Taiwan	Not mentioned	Yes	Prospective	Serum	After cyst puncture by FNA	1999-01-01	2006-12-01	PDAC	Yes	1	Novel	VEGF	Single marker	Yes	PDAC vs Healthy	92	46	46		65		Histology or Cytology	No	Stage I (11), Stage II (37), Stage III (2), Stage IV (42)	No		60	30	30		65		Sex-matched healthy volunteers in whom the absence of neoplastic disease was established by clinical history, physical examination, routine blood tests, urine and stool occult blood tests, chest x-ray examination, abdominal ultrasonography, and follow-up for more than 3 years.
#5797	PMID: 18665074	Serum vascular endothelial growth factor/soluble vascular endothelial growth factor receptor 1 ratio is an independent prognostic marker in pancreatic cancer	Jau-Min Wong	jmwong@ntu.edu.tw	Taiwan	National Science Council, Taiwan	Not mentioned	Yes	Prospective	Serum	After cyst puncture by FNA	1999-01-01	2006-12-01	PDAC	Yes	1	Novel	PIGF	Single marker	Yes	PDAC vs Healthy	92	46	46		65		Histology or Cytology	No	Stage I (11), Stage II (37), Stage III (2), Stage IV (42)	No		60	30	30		65		Sex-matched healthy volunteers in whom the absence of neoplastic disease was established by clinical history, physical examination, routine blood tests, urine and stool occult blood tests, chest x-ray examination, abdominal ultrasonography, and follow-up for more than 3 years.
#1288	PMID: 27685911	Serum leptin levels may have diagnostic and predictive roles in patients with pancreatic adenocarcinoma treated with gemcitabine-based chemotherapy	Senem Karabulut	drsenemkarabulut@gmail.com	Turkey	Not given	None Declared	Not mentioned	Prospective	Serum	After cyst puncture by Surgery	2010-02-01	2013-07-01	PDAC	No	1	Novel	Leptin	Single marker	No	PDAC vs Healthy	33	20	13	32-84	59		Histology	No		No		20						Age, sex and BMI matched
#3638	PMID: 22414467	Preliminary study analyzing the methylated genes in the plasma of patients with pancreatic cancer	Il Hyun Baek	topcolon@hanmail.net	Korea	Not given	None Declared	Not mentioned	Prospective	Plasma	No details given	2004-01-01	2004-09-01	PC	Yes	3	Novel	Ubiquitin carboxyl-terminal esterase L1 (UCHL1) & Neuronal pentraxin II (NPTX2) & Secreted apoptosis related protein 2 (SARP2) & preproenkephalin (ppENK) & Ras association domain family protein 1 (RASSF1A)	Multi-marker panel	No	PDAC vs Healthy	16	9	7			63.9 ± 9.8yrs	Pathology	No	Stage I (1), Stage III (8), Stage IV (7)	No		29	11	18			40.7 ± 12yrs	Subjects without evidence of CP or PC
#2956	PMID: 23398637	Microparticle-associated tissue factor activity in patients with pancreatic cancer: correlation with clinicopathological features	Ingrid Pabinger	ingrid.pabinger@meduniwien.ac.at	Austria	Unrestricted grant from the ‘Hans und Blanca Moser Stiftung’ (Vienna, Austria), an unrestricted grant from the ‘Gesellschaft fur Thrombose- und € H€amostaseforschung’ and an unrestricted grant from the National Institutes of Health (HL 095096)	None Declared	Yes	Prospective	Plasma	No details given	2009-03-01	2011-01-01	PDAC	No	1	Novel	Microparticle-associated tissue factor (MP-TF)	Single marker	Yes	PDAC vs Healthy	73	37	36	36-90			Histopathology	No	Stage I (18), Stage II-III (13), Stage IV (42)	Yes	27 Chemotherapy 4 weeks prior to study. 2 Radiotherapy 4 weeks prior to study.	22	11	11	52-78	60		Same geographic region and ethnic background and were unrelated to patients and also not related to each other. Age and sex matched.
#988	PMID: 25261994	Elevation of circulating branched-chain amino acids is an early event in human pancreatic adenocarcinoma development	Brian M Wolpin	bwolpin@partners.org	USA	Multiple grants (>10)	None Declared	Yes	Prospective	Plasma	No cyst puncture			PDAC	Yes	1	Novel	Isoleusine	Single marker	Yes	PDAC vs Healthy	453	155	298	40-81		63	Medical records reviewed by physician	No	Localised (64), Locally Advanced (105), Metastatic (189), Unknown (95)	No		898	306	592	40-85		62	Our study population included pancreatic cancer cases and controls from four prospective cohort studies: the Health Professionals Follow-Up Study (HPFS), the Nurses' Health Study (NHS), the Physicians' Health Study I (PHS) and the Women's Health Initiative-Observational Study (WHI-OS)
#988	PMID: 25261994	Elevation of circulating branched-chain amino acids is an early event in human pancreatic adenocarcinoma development	Brian M Wolpin	bwolpin@partners.org	USA	Multiple grants (>10)	None Declared	Yes	Prospective	Plasma	No cyst puncture			PDAC	Yes	1	Novel	Leucine	Single marker	Yes	PDAC vs Healthy	453	155	298	40-81		63	Medical records reviewed by physician	No	Localised (64), Locally Advanced (105), Metastatic (189), Unknown (95)	No		898	306	592	40-85		62	Our study population included pancreatic cancer cases and controls from four prospective cohort studies: the Health Professionals Follow-Up Study (HPFS), the Nurses' Health Study (NHS), the Physicians' Health Study I (PHS) and the Women's Health Initiative-Observational Study (WHI-OS)
#988	PMID: 25261994	Elevation of circulating branched-chain amino acids is an early event in human pancreatic adenocarcinoma development	Brian M Wolpin	bwolpin@partners.org	USA	Multiple grants (>10)	None Declared	Yes	Prospective	Plasma	No cyst puncture			PDAC	Yes	1	Novel	Valine	Single marker	Yes	PDAC vs Healthy	453	155	298	40-81		63	Medical records reviewed by physician	No	Localised (64), Locally Advanced (105), Metastatic (189), Unknown (95)	No		898	306	592	40-85		62	Our study population included pancreatic cancer cases and controls from four prospective cohort studies: the Health Professionals Follow-Up Study (HPFS), the Nurses' Health Study (NHS), the Physicians' Health Study I (PHS) and the Women's Health Initiative-Observational Study (WHI-OS)
#3138	PMID: 9505891	Beta human chorionic gonadotropin concentrations in serum of patients with pancreatic adenocarcinoma	K N Syrigos		UK	Not given	Not mentioned	Not mentioned	Prospective	Plasma	No details given			PDAC	No	1	Novel	Human chorionic gonadotropin (hCG)	Single marker	Yes	PDAC vs Healthy	36	19	17	40-82		63.8	Histology	No	Stage I (2), Stage II (3), Stage III (11), Stage IV (20)	No		21	12	9			63.5	None of the participants had previously undergone any kind of anticancer treatment (surgery, chemotherapy, or radiotherapy), nor had testicular disease, as confirmed by clinical and ultrasonographic examination. All female participants were postmenopausal
#4206	PMID: 29344285	Long noncoding RNA H19 derived miR-675 regulates cell proliferation by down-regulating E2F-1 in human pancreatic ductal adenocarcinoma	Yinmo Yang	yangyinmo@263.net	China	Grants from the National Natural Science Foundation of China (No. 81372605, 81572339, and 81672353), the National High Technology Research and Development Program of China (SS2015AA020405) and the Scientific Research and Development Program of Beijing Railway Corporation of China (No. J2017Z605)	None Declared	Yes	Prospective	Serum	Prior to cyst puncture by Surgery			PDAC	No	1	Novel	miR-675	Single marker	No	PDAC vs Healthy	35						Pathology	No		No		38			20-50
#1817	PMID: 27267055	Serum microRNA-196 and microRNA-200 in pancreatic ductal adenocarcinoma of patients with diabetes mellitus	Pavel Skrha	pavel.skrha@email.cz	Czech Republic	The grant of Ministry of Health ofthe Czech Republic (NT 14254-3/2013) and partly by project ofCharles University (P25/LF1/2	None Declared	Yes	Prospective	Serum	No details given			PDAC	Yes	1	Novel	miR-192	Single marker	No	PDAC vs Healthy	60	35	25			67.5	Biopsy or during surgical resection	No	In most patients an advanced form (T3 or T4 stages) of PAC was present;Only 5 patients with PAC were classified as the stage T1 or T2	No		30	22	7			62.6	Persons without any gastrointestinal,liver, renal or endocrine disorders
#1817	PMID: 27267055	Serum microRNA-196 and microRNA-200 in pancreatic ductal adenocarcinoma of patients with diabetes mellitus	Pavel Skrha	pavel.skrha@email.cz	Czech Republic	The grant of Ministry of Health ofthe Czech Republic (NT 14254-3/2013) and partly by project ofCharles University (P25/LF1/3	None Declared	Yes	Prospective	Serum	No details given			PDAC	Yes	1	Novel	miR-192	Single marker	No	PDAC vs Benign	17	9	8			67.6	Biopsy or during surgical resection	No	In most patients an advanced form (T3 or T4 stages) of PAC was present;Only 5 patients with PAC were classified as the stage T1 or T3	No									34	Diabetes	27	7			63.1	Type 2 dia-betes mellitus (T2DM) lasting more than 2 years and without anysymptoms of malignant disease
#1817	PMID: 27267055	Serum microRNA-196 and microRNA-200 in pancreatic ductal adenocarcinoma of patients with diabetes mellitus	Pavel Skrha	pavel.skrha@email.cz	Czech Republic	The grant of Ministry of Health ofthe Czech Republic (NT 14254-3/2013) and partly by project ofCharles University (P25/LF1/4	None Declared	Yes	Prospective	Serum	No details given			PDAC	Yes	1	Novel	miR-192	Single marker	No	PDAC vs Healthy	17	9	8			67.6	Biopsy or during surgical resection	No	In most patients an advanced form (T3 or T4 stages) of PAC was present;Only 5 patients with PAC were classified as the stage T1 or T4	No		30	22	7			62.6	Persons without any gastrointestinal,liver, renal or endocrine disorders
#1817	PMID: 27267055	Serum microRNA-196 and microRNA-200 in pancreatic ductal adenocarcinoma of patients with diabetes mellitus	Pavel Skrha	pavel.skrha@email.cz	Czech Republic	The grant of Ministry of Health ofthe Czech Republic (NT 14254-3/2013) and partly by project ofCharles University (P25/LF1/5	None Declared	Yes	Prospective	Serum	No details given			PDAC	Yes	1	Novel	miR-196	Single marker	No	PDAC vs Healthy	60	35	25			67.5	Biopsy or during surgical resection	No	In most patients an advanced form (T3 or T4 stages) of PAC was present;Only 5 patients with PAC were classified as the stage T1 or T2	No		30	22	7			62.6	Persons without any gastrointestinal,liver, renal or endocrine disorders
#1817	PMID: 27267055	Serum microRNA-196 and microRNA-200 in pancreatic ductal adenocarcinoma of patients with diabetes mellitus	Pavel Skrha	pavel.skrha@email.cz	Czech Republic	The grant of Ministry of Health ofthe Czech Republic (NT 14254-3/2013) and partly by project ofCharles University (P25/LF1/6	None Declared	Yes	Prospective	Serum	No details given			PDAC	Yes	1	Novel	miR-196	Single marker	No	PDAC vs Benign	17	9	8			67.6	Biopsy or during surgical resection	No	In most patients an advanced form (T3 or T4 stages) of PAC was present;Only 5 patients with PAC were classified as the stage T1 or T3	No									34	Diabetes	27	7			63.1	Type 2 dia-betes mellitus (T2DM) lasting more than 2 years and without anysymptoms of malignant disease
#1817	PMID: 27267055	Serum microRNA-196 and microRNA-200 in pancreatic ductal adenocarcinoma of patients with diabetes mellitus	Pavel Skrha	pavel.skrha@email.cz	Czech Republic	The grant of Ministry of Health ofthe Czech Republic (NT 14254-3/2013) and partly by project ofCharles University (P25/LF1/7	None Declared	Yes	Prospective	Serum	No details given			PDAC	Yes	1	Novel	miR-196	Single marker	No	PDAC vs Healthy	17	9	8			67.6	Biopsy or during surgical resection	No	In most patients an advanced form (T3 or T4 stages) of PAC was present;Only 5 patients with PAC were classified as the stage T1 or T4	No		30	22	7			62.6	Persons without any gastrointestinal,liver, renal or endocrine disorders
#1817	PMID: 27267055	Serum microRNA-196 and microRNA-200 in pancreatic ductal adenocarcinoma of patients with diabetes mellitus	Pavel Skrha	pavel.skrha@email.cz	Czech Republic	The grant of Ministry of Health ofthe Czech Republic (NT 14254-3/2013) and partly by project ofCharles University (P25/LF1/8	None Declared	Yes	Prospective	Serum	No details given			PDAC	Yes	1	Novel	miR-200	Single marker	No	PDAC vs Healthy	60	35	25			67.5	Biopsy or during surgical resection	No	In most patients an advanced form (T3 or T4 stages) of PAC was present;Only 5 patients with PAC were classified as the stage T1 or T2	No		30	22	7			62.6	Persons without any gastrointestinal,liver, renal or endocrine disorders
#1817	PMID: 27267055	Serum microRNA-196 and microRNA-200 in pancreatic ductal adenocarcinoma of patients with diabetes mellitus	Pavel Skrha	pavel.skrha@email.cz	Czech Republic	The grant of Ministry of Health ofthe Czech Republic (NT 14254-3/2013) and partly by project ofCharles University (P25/LF1/9	None Declared	Yes	Prospective	Serum	No details given			PDAC	Yes	1	Novel	miR-200	Single marker	No	PDAC vs Benign	17	9	8			67.6	Biopsy or during surgical resection	No	In most patients an advanced form (T3 or T4 stages) of PAC was present;Only 5 patients with PAC were classified as the stage T1 or T3	No									34	Diabetes	27	7			63.1	Type 2 dia-betes mellitus (T2DM) lasting more than 2 years and without anysymptoms of malignant disease
#1817	PMID: 27267055	Serum microRNA-196 and microRNA-200 in pancreatic ductal adenocarcinoma of patients with diabetes mellitus	Pavel Skrha	pavel.skrha@email.cz	Czech Republic	The grant of Ministry of Health ofthe Czech Republic (NT 14254-3/2013) and partly by project ofCharles University (P25/LF1/10	None Declared	Yes	Prospective	Serum	No details given			PDAC	Yes	1	Novel	miR-200	Single marker	No	PDAC vs Healthy	17	9	8			67.6	Biopsy or during surgical resection	No	In most patients an advanced form (T3 or T4 stages) of PAC was present;Only 5 patients with PAC were classified as the stage T1 or T4	No		30	22	7			62.6	Persons without any gastrointestinal,liver, renal or endocrine disorders
#1817	PMID: 27267055	Serum microRNA-196 and microRNA-200 in pancreatic ductal adenocarcinoma of patients with diabetes mellitus	Pavel Skrha	pavel.skrha@email.cz	Czech Republic	The grant of Ministry of Health ofthe Czech Republic (NT 14254-3/2013) and partly by project ofCharles University (P25/LF1/11	None Declared	Yes	Prospective	Serum	No details given			PDAC	Yes	1	Novel	miR-21	Single marker	No	PDAC vs Healthy	60	35	25			67.5	Biopsy or during surgical resection	No	In most patients an advanced form (T3 or T4 stages) of PAC was present;Only 5 patients with PAC were classified as the stage T1 or T2	No		30	22	7			62.6	Persons without any gastrointestinal,liver, renal or endocrine disorders
#1817	PMID: 27267055	Serum microRNA-196 and microRNA-200 in pancreatic ductal adenocarcinoma of patients with diabetes mellitus	Pavel Skrha	pavel.skrha@email.cz	Czech Republic	The grant of Ministry of Health ofthe Czech Republic (NT 14254-3/2013) and partly by project ofCharles University (P25/LF1/12	None Declared	Yes	Prospective	Serum	No details given			PDAC	Yes	1	Novel	miR-21	Single marker	No	PDAC vs Benign	17	9	8			67.6	Biopsy or during surgical resection	No	In most patients an advanced form (T3 or T4 stages) of PAC was present;Only 5 patients with PAC were classified as the stage T1 or T3	No									34	Diabetes	27	7			63.1	Type 2 dia-betes mellitus (T2DM) lasting more than 2 years and without anysymptoms of malignant disease
#1817	PMID: 27267055	Serum microRNA-196 and microRNA-200 in pancreatic ductal adenocarcinoma of patients with diabetes mellitus	Pavel Skrha	pavel.skrha@email.cz	Czech Republic	The grant of Ministry of Health ofthe Czech Republic (NT 14254-3/2013) and partly by project ofCharles University (P25/LF1/13	None Declared	Yes	Prospective	Serum	No details given			PDAC	Yes	1	Novel	miR-21	Single marker	No	PDAC vs Healthy	17	9	8			67.6	Biopsy or during surgical resection	No	In most patients an advanced form (T3 or T4 stages) of PAC was present;Only 5 patients with PAC were classified as the stage T1 or T4	No		30	22	7			62.6	Persons without any gastrointestinal,liver, renal or endocrine disorders
#1817	PMID: 27267055	Serum microRNA-196 and microRNA-200 in pancreatic ductal adenocarcinoma of patients with diabetes mellitus	Pavel Skrha	pavel.skrha@email.cz	Czech Republic	The grant of Ministry of Health ofthe Czech Republic (NT 14254-3/2013) and partly by project ofCharles University (P25/LF1/14	None Declared	Yes	Prospective	Serum	No details given			PDAC	Yes	1	Novel	miR-30	Single marker	No	PDAC vs Healthy	60	35	25			67.5	Biopsy or during surgical resection	No	In most patients an advanced form (T3 or T4 stages) of PAC was present;Only 5 patients with PAC were classified as the stage T1 or T2	No		30	22	7			62.6	Persons without any gastrointestinal,liver, renal or endocrine disorders
#1817	PMID: 27267055	Serum microRNA-196 and microRNA-200 in pancreatic ductal adenocarcinoma of patients with diabetes mellitus	Pavel Skrha	pavel.skrha@email.cz	Czech Republic	The grant of Ministry of Health ofthe Czech Republic (NT 14254-3/2013) and partly by project ofCharles University (P25/LF1/15	None Declared	Yes	Prospective	Serum	No details given			PDAC	Yes	1	Novel	miR-30	Single marker	No	PDAC vs Benign	17	9	8			67.6	Biopsy or during surgical resection	No	In most patients an advanced form (T3 or T4 stages) of PAC was present;Only 5 patients with PAC were classified as the stage T1 or T3	No									34	Diabetes	27	7			63.1	Type 2 dia-betes mellitus (T2DM) lasting more than 2 years and without anysymptoms of malignant disease
#1817	PMID: 27267055	Serum microRNA-196 and microRNA-200 in pancreatic ductal adenocarcinoma of patients with diabetes mellitus	Pavel Skrha	pavel.skrha@email.cz	Czech Republic	The grant of Ministry of Health ofthe Czech Republic (NT 14254-3/2013) and partly by project ofCharles University (P25/LF1/16	None Declared	Yes	Prospective	Serum	No details given			PDAC	Yes	1	Novel	miR-30	Single marker	No	PDAC vs Healthy	17	9	8			67.6	Biopsy or during surgical resection	No	In most patients an advanced form (T3 or T4 stages) of PAC was present;Only 5 patients with PAC were classified as the stage T1 or T4	No		30	22	7			62.6	Persons without any gastrointestinal,liver, renal or endocrine disorders
#1817	PMID: 27267055	Serum microRNA-196 and microRNA-200 in pancreatic ductal adenocarcinoma of patients with diabetes mellitus	Pavel Skrha	pavel.skrha@email.cz	Czech Republic	The grant of Ministry of Health ofthe Czech Republic (NT 14254-3/2013) and partly by project ofCharles University (P25/LF1/17	None Declared	Yes	Prospective	Serum	No details given			PDAC	Yes	1	Novel	Fasting plasma glucose (FPG)	Single marker	No	PDAC vs Healthy	60	35	25			67.5	Biopsy or during surgical resection	No	In most patients an advanced form (T3 or T4 stages) of PAC was present;Only 5 patients with PAC were classified as the stage T1 or T2	No		30	22	7			62.6	Persons without any gastrointestinal,liver, renal or endocrine disorders
#1817	PMID: 27267055	Serum microRNA-196 and microRNA-200 in pancreatic ductal adenocarcinoma of patients with diabetes mellitus	Pavel Skrha	pavel.skrha@email.cz	Czech Republic	The grant of Ministry of Health ofthe Czech Republic (NT 14254-3/2013) and partly by project ofCharles University (P25/LF1/18	None Declared	Yes	Prospective	Serum	No details given			PDAC	Yes	1	Novel	Fasting plasma glucose (FPG)	Single marker	No	PDAC vs Benign	17	9	8			67.6	Biopsy or during surgical resection	No	In most patients an advanced form (T3 or T4 stages) of PAC was present;Only 5 patients with PAC were classified as the stage T1 or T3	No									34	Diabetes	27	7			63.1	Type 2 dia-betes mellitus (T2DM) lasting more than 2 years and without anysymptoms of malignant disease
#1817	PMID: 27267055	Serum microRNA-196 and microRNA-200 in pancreatic ductal adenocarcinoma of patients with diabetes mellitus	Pavel Skrha	pavel.skrha@email.cz	Czech Republic	The grant of Ministry of Health ofthe Czech Republic (NT 14254-3/2013) and partly by project ofCharles University (P25/LF1/19	None Declared	Yes	Prospective	Serum	No details given			PDAC	Yes	1	Novel	Glycated hemoglobin (HbA1c)	Single marker	No	PDAC vs Healthy	60	35	25			67.5	Biopsy or during surgical resection	No	In most patients an advanced form (T3 or T4 stages) of PAC was present;Only 5 patients with PAC were classified as the stage T1 or T2	No		30	22	7			62.6	Persons without any gastrointestinal,liver, renal or endocrine disorders
#1817	PMID: 27267055	Serum microRNA-196 and microRNA-200 in pancreatic ductal adenocarcinoma of patients with diabetes mellitus	Pavel Skrha	pavel.skrha@email.cz	Czech Republic	The grant of Ministry of Health ofthe Czech Republic (NT 14254-3/2013) and partly by project ofCharles University (P25/LF1/20	None Declared	Yes	Prospective	Serum	No details given			PDAC	Yes	1	Novel	Glycated hemoglobin (HbA1c)	Single marker	No	PDAC vs Benign	17	9	8			67.6	Biopsy or during surgical resection	No	In most patients an advanced form (T3 or T4 stages) of PAC was present;Only 5 patients with PAC were classified as the stage T1 or T3	No									34	Diabetes	27	7			63.1	Type 2 dia-betes mellitus (T2DM) lasting more than 2 years and without anysymptoms of malignant disease
#1817	PMID: 27267055	Serum microRNA-196 and microRNA-200 in pancreatic ductal adenocarcinoma of patients with diabetes mellitus	Pavel Skrha	pavel.skrha@email.cz	Czech Republic	The grant of Ministry of Health ofthe Czech Republic (NT 14254-3/2013) and partly by project ofCharles University (P25/LF1/21	None Declared	Yes	Prospective	Serum	No details given			PDAC	Yes	1	Novel	CEA	Single marker	No	PDAC vs Healthy	60	35	25			67.5	Biopsy or during surgical resection	No	In most patients an advanced form (T3 or T4 stages) of PAC was present;Only 5 patients with PAC were classified as the stage T1 or T2	No		30	22	7			62.6	Persons without any gastrointestinal,liver, renal or endocrine disorders
#1817	PMID: 27267055	Serum microRNA-196 and microRNA-200 in pancreatic ductal adenocarcinoma of patients with diabetes mellitus	Pavel Skrha	pavel.skrha@email.cz	Czech Republic	The grant of Ministry of Health ofthe Czech Republic (NT 14254-3/2013) and partly by project ofCharles University (P25/LF1/22	None Declared	Yes	Prospective	Serum	No details given			PDAC	Yes	1	CA19-9	CA19-9	Single marker	No	PDAC vs Healthy	60	35	25			67.5	Biopsy or during surgical resection	No	In most patients an advanced form (T3 or T4 stages) of PAC was present;Only 5 patients with PAC were classified as the stage T1 or T2	No		30	22	7			62.6	Persons without any gastrointestinal,liver, renal or endocrine disorders
#1817	PMID: 27267055	Serum microRNA-196 and microRNA-200 in pancreatic ductal adenocarcinoma of patients with diabetes mellitus	Pavel Skrha	pavel.skrha@email.cz	Czech Republic	The grant of Ministry of Health ofthe Czech Republic (NT 14254-3/2013) and partly by project ofCharles University (P25/LF1/23	None Declared	Yes	Prospective	Serum	No details given			PDAC	Yes	1	CA19-9	CA19-9	Single marker	No	PDAC vs Benign	17	9	8			67.6	Biopsy or during surgical resection	No	In most patients an advanced form (T3 or T4 stages) of PAC was present;Only 5 patients with PAC were classified as the stage T1 or T3	No									34	Diabetes	27	7			63.1	Type 2 dia-betes mellitus (T2DM) lasting more than 2 years and without anysymptoms of malignant disease
#1817	PMID: 27267055	Serum microRNA-196 and microRNA-200 in pancreatic ductal adenocarcinoma of patients with diabetes mellitus	Pavel Skrha	pavel.skrha@email.cz	Czech Republic	The grant of Ministry of Health ofthe Czech Republic (NT 14254-3/2013) and partly by project ofCharles University (P25/LF1/24	None Declared	Yes	Prospective	Serum	No details given			PDAC	Yes	1	CA19-9	CA19-9	Single marker	No	PDAC vs Healthy	17	9	8			67.6	Biopsy or during surgical resection	No	In most patients an advanced form (T3 or T4 stages) of PAC was present;Only 5 patients with PAC were classified as the stage T1 or T3	No		30	22	7			62.6	Persons without any gastrointestinal,liver, renal or endocrine disorders
#1765	PMID: 24884871	Serum cytokine biomarker panels for discriminating pancreatic cancer from benign pancreatic disease	Eithne Costello	ecostell@liverpool.ac.uk	UK	This work was supported by The National Institute for Health Research Pancreas Biomedical Research Unit, Cancer Research UK grant A12790 and Pancreatic Cancer UK	None Declared	Yes	Prospective	Serum	Prior to cyst puncture by Surgery			PDAC	Yes	1	CA19-9	CA19-9	Single marker	Yes	PDAC vs Healthy	127	71	56				Histology	No	Moderately Differentiated (45), Poorly Differentiated (26), Well Differentiated (15)	No		45	23	22
#1765	PMID: 24884871	Serum cytokine biomarker panels for discriminating pancreatic cancer from benign pancreatic disease	Eithne Costello	ecostell@liverpool.ac.uk	UK	This work was supported by The National Institute for Health Research Pancreas Biomedical Research Unit, Cancer Research UK grant A12790 and Pancreatic Cancer UK	None Declared	Yes	Prospective	Serum	Prior to cyst puncture by Surgery			PDAC	Yes	1	CA19-9	CA19-9	Single marker	Yes	PDAC vs Benign	127	71	56				Histology	No	Moderately Differentiated (45), Poorly Differentiated (26), Well Differentiated (15)	No									49	Chronic pancreatitis	30	19
#1765	PMID: 24884871	Serum cytokine biomarker panels for discriminating pancreatic cancer from benign pancreatic disease	Eithne Costello	ecostell@liverpool.ac.uk	UK	This work was supported by The National Institute for Health Research Pancreas Biomedical Research Unit, Cancer Research UK grant A12790 and Pancreatic Cancer UK	None Declared	Yes	Prospective	Serum	Prior to cyst puncture by Surgery			PDAC	Yes	1	CA19-9	CA19-9	Single marker	Yes	PDAC vs Benign	127	71	56				Histology	No	Moderately Differentiated (45), Poorly Differentiated (26), Well Differentiated (15)	No
#1765	PMID: 24884871	Serum cytokine biomarker panels for discriminating pancreatic cancer from benign pancreatic disease	Eithne Costello	ecostell@liverpool.ac.uk	UK	This work was supported by The National Institute for Health Research Pancreas Biomedical Research Unit, Cancer Research UK grant A12790 and Pancreatic Cancer UK	None Declared	Yes	Prospective	Serum	Prior to cyst puncture by Surgery			PDAC	Yes	1	Novel	Eotaxin	Single marker	Yes	PDAC vs Benign	127	71	56				Histology	No	Moderately Differentiated (45), Poorly Differentiated (26), Well Differentiated (15)	No																	20	Other
#1765	PMID: 24884871	Serum cytokine biomarker panels for discriminating pancreatic cancer from benign pancreatic disease	Eithne Costello	ecostell@liverpool.ac.uk	UK	This work was supported by The National Institute for Health Research Pancreas Biomedical Research Unit, Cancer Research UK grant A12790 and Pancreatic Cancer UK	None Declared	Yes	Prospective	Serum	Prior to cyst puncture by Surgery			PDAC	Yes	1	Novel	IL-1b	Single marker	Yes	PDAC vs Benign	127	71	56				Histology	No	Moderately Differentiated (45), Poorly Differentiated (26), Well Differentiated (15)	No																	20	Other
#1765	PMID: 24884871	Serum cytokine biomarker panels for discriminating pancreatic cancer from benign pancreatic disease	Eithne Costello	ecostell@liverpool.ac.uk	UK	This work was supported by The National Institute for Health Research Pancreas Biomedical Research Unit, Cancer Research UK grant A12790 and Pancreatic Cancer UK	None Declared	Yes	Prospective	Serum	Prior to cyst puncture by Surgery			PDAC	Yes	1	Novel	IL-1ra	Single marker	Yes	PDAC vs Healthy	127	71	56				Histology	No	Moderately Differentiated (45), Poorly Differentiated (26), Well Differentiated (15)	No		45	23	22
#1765	PMID: 24884871	Serum cytokine biomarker panels for discriminating pancreatic cancer from benign pancreatic disease	Eithne Costello	ecostell@liverpool.ac.uk	UK	This work was supported by The National Institute for Health Research Pancreas Biomedical Research Unit, Cancer Research UK grant A12790 and Pancreatic Cancer UK	None Declared	Yes	Prospective	Serum	Prior to cyst puncture by Surgery			PDAC	Yes	1	Novel	IL-6	Single marker	Yes	PDAC vs Healthy	127	71	56				Histology	No	Moderately Differentiated (45), Poorly Differentiated (26), Well Differentiated (15)	No		45	23	22
#1765	PMID: 24884871	Serum cytokine biomarker panels for discriminating pancreatic cancer from benign pancreatic disease	Eithne Costello	ecostell@liverpool.ac.uk	UK	This work was supported by The National Institute for Health Research Pancreas Biomedical Research Unit, Cancer Research UK grant A12790 and Pancreatic Cancer UK	None Declared	Yes	Prospective	Serum	Prior to cyst puncture by Surgery			PDAC	Yes	1	Novel	IL-8	Single marker	Yes	PDAC vs Healthy	127	71	56				Histology	No	Moderately Differentiated (45), Poorly Differentiated (26), Well Differentiated (15)	No		45	23	22
#1765	PMID: 24884871	Serum cytokine biomarker panels for discriminating pancreatic cancer from benign pancreatic disease	Eithne Costello	ecostell@liverpool.ac.uk	UK	This work was supported by The National Institute for Health Research Pancreas Biomedical Research Unit, Cancer Research UK grant A12790 and Pancreatic Cancer UK	None Declared	Yes	Prospective	Serum	Prior to cyst puncture by Surgery			PDAC	Yes	1	Novel	IL-8	Single marker	Yes	PDAC vs Benign	127	71	56				Histology	No	Moderately Differentiated (45), Poorly Differentiated (26), Well Differentiated (15)	No									49	Chronic pancreatitis	30	19
#1765	PMID: 24884871	Serum cytokine biomarker panels for discriminating pancreatic cancer from benign pancreatic disease	Eithne Costello	ecostell@liverpool.ac.uk	UK	This work was supported by The National Institute for Health Research Pancreas Biomedical Research Unit, Cancer Research UK grant A12790 and Pancreatic Cancer UK	None Declared	Yes	Prospective	Serum	Prior to cyst puncture by Surgery			PDAC	Yes	1	Novel	IL-8	Single marker	Yes	PDAC vs Benign	127	71	56				Histology	No	Moderately Differentiated (45), Poorly Differentiated (26), Well Differentiated (15)	No
#1765	PMID: 24884871	Serum cytokine biomarker panels for discriminating pancreatic cancer from benign pancreatic disease	Eithne Costello	ecostell@liverpool.ac.uk	UK	This work was supported by The National Institute for Health Research Pancreas Biomedical Research Unit, Cancer Research UK grant A12790 and Pancreatic Cancer UK	None Declared	Yes	Prospective	Serum	Prior to cyst puncture by Surgery			PDAC	Yes	1	Novel	IP-10	Single marker	Yes	PDAC vs Healthy	127	71	56				Histology	No	Moderately Differentiated (45), Poorly Differentiated (26), Well Differentiated (15)	No		45	23	22
#1765	PMID: 24884871	Serum cytokine biomarker panels for discriminating pancreatic cancer from benign pancreatic disease	Eithne Costello	ecostell@liverpool.ac.uk	UK	This work was supported by The National Institute for Health Research Pancreas Biomedical Research Unit, Cancer Research UK grant A12790 and Pancreatic Cancer UK	None Declared	Yes	Prospective	Serum	Prior to cyst puncture by Surgery			PDAC	Yes	1	Novel	IP-10	Single marker	Yes	PDAC vs Benign	127	71	56				Histology	No	Moderately Differentiated (45), Poorly Differentiated (26), Well Differentiated (15)	No									49	Chronic pancreatitis	30	19
#1765	PMID: 24884871	Serum cytokine biomarker panels for discriminating pancreatic cancer from benign pancreatic disease	Eithne Costello	ecostell@liverpool.ac.uk	UK	This work was supported by The National Institute for Health Research Pancreas Biomedical Research Unit, Cancer Research UK grant A12790 and Pancreatic Cancer UK	None Declared	Yes	Prospective	Serum	Prior to cyst puncture by Surgery			PDAC	Yes	1	Novel	IP-10	Single marker	Yes	PDAC vs Benign	127	71	56				Histology	No	Moderately Differentiated (45), Poorly Differentiated (26), Well Differentiated (15)	No
#1765	PMID: 24884871	Serum cytokine biomarker panels for discriminating pancreatic cancer from benign pancreatic disease	Eithne Costello	ecostell@liverpool.ac.uk	UK	This work was supported by The National Institute for Health Research Pancreas Biomedical Research Unit, Cancer Research UK grant A12790 and Pancreatic Cancer UK	None Declared	Yes	Prospective	Serum	Prior to cyst puncture by Surgery			PDAC	Yes	1	Novel	MIP-1b	Single marker	Yes	PDAC vs Healthy	127	71	56				Histology	No	Moderately Differentiated (45), Poorly Differentiated (26), Well Differentiated (15)	No		45	23	22
#1765	PMID: 24884871	Serum cytokine biomarker panels for discriminating pancreatic cancer from benign pancreatic disease	Eithne Costello	ecostell@liverpool.ac.uk	UK	This work was supported by The National Institute for Health Research Pancreas Biomedical Research Unit, Cancer Research UK grant A12790 and Pancreatic Cancer UK	None Declared	Yes	Prospective	Serum	Prior to cyst puncture by Surgery			PDAC	Yes	1	Novel	MIP-1b	Single marker	Yes	PDAC vs Benign	127	71	56				Histology	No	Moderately Differentiated (45), Poorly Differentiated (26), Well Differentiated (15)	No																	20	Other
#1765	PMID: 24884871	Serum cytokine biomarker panels for discriminating pancreatic cancer from benign pancreatic disease	Eithne Costello	ecostell@liverpool.ac.uk	UK	This work was supported by The National Institute for Health Research Pancreas Biomedical Research Unit, Cancer Research UK grant A12790 and Pancreatic Cancer UK	None Declared	Yes	Prospective	Serum	Prior to cyst puncture by Surgery			PDAC	Yes	1	Novel	MIP-1b	Single marker	Yes	PDAC vs Benign	127	71	56				Histology	No	Moderately Differentiated (45), Poorly Differentiated (26), Well Differentiated (15)	No
#1765	PMID: 24884871	Serum cytokine biomarker panels for discriminating pancreatic cancer from benign pancreatic disease	Eithne Costello	ecostell@liverpool.ac.uk	UK	This work was supported by The National Institute for Health Research Pancreas Biomedical Research Unit, Cancer Research UK grant A12790 and Pancreatic Cancer UK	None Declared	Yes	Prospective	Serum	Prior to cyst puncture by Surgery			PDAC	Yes	1	Novel	PDGF	Single marker	Yes	PDAC vs Benign	127	71	56				Histology	No	Moderately Differentiated (45), Poorly Differentiated (26), Well Differentiated (15)	No																	20	Other
#1765	PMID: 24884871	Serum cytokine biomarker panels for discriminating pancreatic cancer from benign pancreatic disease	Eithne Costello	ecostell@liverpool.ac.uk	UK	This work was supported by The National Institute for Health Research Pancreas Biomedical Research Unit, Cancer Research UK grant A12790 and Pancreatic Cancer UK	None Declared	Yes	Prospective	Serum	Prior to cyst puncture by Surgery			PDAC	Yes	1	Novel	PDGF	Single marker	Yes	PDAC vs Benign	127	71	56				Histology	No	Moderately Differentiated (45), Poorly Differentiated (26), Well Differentiated (15)	No
#1765	PMID: 24884871	Serum cytokine biomarker panels for discriminating pancreatic cancer from benign pancreatic disease	Eithne Costello	ecostell@liverpool.ac.uk	UK	This work was supported by The National Institute for Health Research Pancreas Biomedical Research Unit, Cancer Research UK grant A12790 and Pancreatic Cancer UK	None Declared	Yes	Prospective	Serum	Prior to cyst puncture by Surgery			PDAC	Yes	3	CA19-9	IL-8 & CA19-9 & IL-1b	Multi-marker panel	Yes	PDAC vs Healthy	84	47	37		66		Histology	No	Moderately Differentiated (31), Poorly Differentiated (16), Well Differentiated (10)	No		29	14	15		44
#1765	PMID: 24884871	Serum cytokine biomarker panels for discriminating pancreatic cancer from benign pancreatic disease	Eithne Costello	ecostell@liverpool.ac.uk	UK	This work was supported by The National Institute for Health Research Pancreas Biomedical Research Unit, Cancer Research UK grant A12790 and Pancreatic Cancer UK	None Declared	Yes	Prospective	Serum	Prior to cyst puncture by Surgery			PDAC	Yes	1	CA19-9	CA19-9	Single marker	Yes	PDAC vs Healthy	84	47	37		66		Histology	No	Moderately Differentiated (31), Poorly Differentiated (16), Well Differentiated (10)	No		29	14	15		44
#1765	PMID: 24884871	Serum cytokine biomarker panels for discriminating pancreatic cancer from benign pancreatic disease	Eithne Costello	ecostell@liverpool.ac.uk	UK	This work was supported by The National Institute for Health Research Pancreas Biomedical Research Unit, Cancer Research UK grant A12790 and Pancreatic Cancer UK	None Declared	Yes	Prospective	Serum	Prior to cyst puncture by Surgery			PDAC	Yes	3	CA19-9	IL-8 & CA19-9 & IL-1b	Multi-marker panel	Yes	PDAC vs Healthy	43	24	19		68		Histology	No	Moderately Differentiated (14), Poorly Differentiated (10), Well Differentiated (5)	No		16	9	7		56.5
#1765	PMID: 24884871	Serum cytokine biomarker panels for discriminating pancreatic cancer from benign pancreatic disease	Eithne Costello	ecostell@liverpool.ac.uk	UK	This work was supported by The National Institute for Health Research Pancreas Biomedical Research Unit, Cancer Research UK grant A12790 and Pancreatic Cancer UK	None Declared	Yes	Prospective	Serum	Prior to cyst puncture by Surgery			PDAC	Yes	1	CA19-9	CA19-9	Single marker	Yes	PDAC vs Healthy	43	24	19		68		Histology	No	Moderately Differentiated (14), Poorly Differentiated (10), Well Differentiated (5)	No		16	9	7		56.5
#1765	PMID: 24884871	Serum cytokine biomarker panels for discriminating pancreatic cancer from benign pancreatic disease	Eithne Costello	ecostell@liverpool.ac.uk	UK	This work was supported by The National Institute for Health Research Pancreas Biomedical Research Unit, Cancer Research UK grant A12790 and Pancreatic Cancer UK	None Declared	Yes	Prospective	Serum	Prior to cyst puncture by Surgery			PDAC	Yes	3	CA19-9	IL-8 & CA19-9 & IL-1b	Multi-marker panel	Yes	PDAC vs Healthy	127	71	56				Histology	No	Moderately Differentiated (45), Poorly Differentiated (26), Well Differentiated (15)	No		45	23	22
#1765	PMID: 24884871	Serum cytokine biomarker panels for discriminating pancreatic cancer from benign pancreatic disease	Eithne Costello	ecostell@liverpool.ac.uk	UK	This work was supported by The National Institute for Health Research Pancreas Biomedical Research Unit, Cancer Research UK grant A12790 and Pancreatic Cancer UK	None Declared	Yes	Prospective	Serum	Prior to cyst puncture by Surgery			PDAC	Yes	1	CA19-9	CA19-9	Single marker	Yes	PDAC vs Healthy	127	71	56				Histology	No	Moderately Differentiated (45), Poorly Differentiated (26), Well Differentiated (15)	No		45	23	22
#1765	PMID: 24884871	Serum cytokine biomarker panels for discriminating pancreatic cancer from benign pancreatic disease	Eithne Costello	ecostell@liverpool.ac.uk	UK	This work was supported by The National Institute for Health Research Pancreas Biomedical Research Unit, Cancer Research UK grant A12790 and Pancreatic Cancer UK	None Declared	Yes	Prospective	Serum	Prior to cyst puncture by Surgery			PDAC	Yes	5	CA19-9	IL-8 & IP-10 & IL-6 & PDGF & CA19-9	Multi-marker panel	Yes	PDAC vs Benign	84	47	37		66		Histology	No	Moderately Differentiated (31), Poorly Differentiated (16), Well Differentiated (10)	No
#1765	PMID: 24884871	Serum cytokine biomarker panels for discriminating pancreatic cancer from benign pancreatic disease	Eithne Costello	ecostell@liverpool.ac.uk	UK	This work was supported by The National Institute for Health Research Pancreas Biomedical Research Unit, Cancer Research UK grant A12790 and Pancreatic Cancer UK	None Declared	Yes	Prospective	Serum	Prior to cyst puncture by Surgery			PDAC	Yes	1	CA19-9	CA19-9	Single marker	Yes	PDAC vs Benign	84	47	37		66		Histology	No	Moderately Differentiated (31), Poorly Differentiated (16), Well Differentiated (10)	No
#1765	PMID: 24884871	Serum cytokine biomarker panels for discriminating pancreatic cancer from benign pancreatic disease	Eithne Costello	ecostell@liverpool.ac.uk	UK	This work was supported by The National Institute for Health Research Pancreas Biomedical Research Unit, Cancer Research UK grant A12790 and Pancreatic Cancer UK	None Declared	Yes	Prospective	Serum	Prior to cyst puncture by Surgery			PDAC	Yes	5	CA19-9	IL-8 & IP-10 & IL-6 & PDGF & CA19-9	Multi-marker panel	Yes	PDAC vs Benign	43	24	19		68		Histology	No	Moderately Differentiated (14), Poorly Differentiated (10), Well Differentiated (5)	No
#1765	PMID: 24884871	Serum cytokine biomarker panels for discriminating pancreatic cancer from benign pancreatic disease	Eithne Costello	ecostell@liverpool.ac.uk	UK	This work was supported by The National Institute for Health Research Pancreas Biomedical Research Unit, Cancer Research UK grant A12790 and Pancreatic Cancer UK	None Declared	Yes	Prospective	Serum	Prior to cyst puncture by Surgery			PDAC	Yes	1	CA19-9	CA19-9	Single marker	Yes	PDAC vs Benign	43	24	19		68		Histology	No	Moderately Differentiated (14), Poorly Differentiated (10), Well Differentiated (5)	No
#1765	PMID: 24884871	Serum cytokine biomarker panels for discriminating pancreatic cancer from benign pancreatic disease	Eithne Costello	ecostell@liverpool.ac.uk	UK	This work was supported by The National Institute for Health Research Pancreas Biomedical Research Unit, Cancer Research UK grant A12790 and Pancreatic Cancer UK	None Declared	Yes	Prospective	Serum	Prior to cyst puncture by Surgery			PDAC	Yes	5	CA19-9	IL-8 & IP-10 & IL-6 & PDGF & CA19-9	Multi-marker panel	Yes	PDAC vs Benign	127	71	56				Histology	No	Moderately Differentiated (45), Poorly Differentiated (26), Well Differentiated (15)	No
#1765	PMID: 24884871	Serum cytokine biomarker panels for discriminating pancreatic cancer from benign pancreatic disease	Eithne Costello	ecostell@liverpool.ac.uk	UK	This work was supported by The National Institute for Health Research Pancreas Biomedical Research Unit, Cancer Research UK grant A12790 and Pancreatic Cancer UK	None Declared	Yes	Prospective	Serum	Prior to cyst puncture by Surgery			PDAC	Yes	1	CA19-9	CA19-9	Single marker	Yes	PDAC vs Benign	127	71	56				Histology	No	Moderately Differentiated (45), Poorly Differentiated (26), Well Differentiated (15)	No
#1765	PMID: 24884871	Serum cytokine biomarker panels for discriminating pancreatic cancer from benign pancreatic disease	Eithne Costello	ecostell@liverpool.ac.uk	UK	This work was supported by The National Institute for Health Research Pancreas Biomedical Research Unit, Cancer Research UK grant A12790 and Pancreatic Cancer UK	None Declared	Yes	Prospective	Serum	Prior to cyst puncture by Surgery			PDAC	Yes	4	CA19-9	IL-8 & CA19-9 & IL-6 & IP-10	Multi-marker panel	Yes	PDAC vs Benign	84	47	37		66		Histology	No	Moderately Differentiated (31), Poorly Differentiated (16), Well Differentiated (10)	No									32	Chronic pancreatitis	20	12		53
#1765	PMID: 24884871	Serum cytokine biomarker panels for discriminating pancreatic cancer from benign pancreatic disease	Eithne Costello	ecostell@liverpool.ac.uk	UK	This work was supported by The National Institute for Health Research Pancreas Biomedical Research Unit, Cancer Research UK grant A12790 and Pancreatic Cancer UK	None Declared	Yes	Prospective	Serum	Prior to cyst puncture by Surgery			PDAC	Yes	1	CA19-9	CA19-9	Single marker	Yes	PDAC vs Benign	84	47	37		66		Histology	No	Moderately Differentiated (31), Poorly Differentiated (16), Well Differentiated (10)	No									32	Chronic pancreatitis	20	12		53
#1765	PMID: 24884871	Serum cytokine biomarker panels for discriminating pancreatic cancer from benign pancreatic disease	Eithne Costello	ecostell@liverpool.ac.uk	UK	This work was supported by The National Institute for Health Research Pancreas Biomedical Research Unit, Cancer Research UK grant A12790 and Pancreatic Cancer UK	None Declared	Yes	Prospective	Serum	Prior to cyst puncture by Surgery			PDAC	Yes	4	CA19-9	IL-8 & CA19-9 & IL-6 & IP-10	Multi-marker panel	Yes	PDAC vs Benign	43	24	19		68		Histology	No	Moderately Differentiated (14), Poorly Differentiated (10), Well Differentiated (5)	No									17	Chronic pancreatitis	10	7		53
#1765	PMID: 24884871	Serum cytokine biomarker panels for discriminating pancreatic cancer from benign pancreatic disease	Eithne Costello	ecostell@liverpool.ac.uk	UK	This work was supported by The National Institute for Health Research Pancreas Biomedical Research Unit, Cancer Research UK grant A12790 and Pancreatic Cancer UK	None Declared	Yes	Prospective	Serum	Prior to cyst puncture by Surgery			PDAC	Yes	1	CA19-9	CA19-9	Single marker	Yes	PDAC vs Benign	43	24	19		68		Histology	No	Moderately Differentiated (14), Poorly Differentiated (10), Well Differentiated (5)	No									17	Chronic pancreatitis	10	7		53
#1765	PMID: 24884871	Serum cytokine biomarker panels for discriminating pancreatic cancer from benign pancreatic disease	Eithne Costello	ecostell@liverpool.ac.uk	UK	This work was supported by The National Institute for Health Research Pancreas Biomedical Research Unit, Cancer Research UK grant A12790 and Pancreatic Cancer UK	None Declared	Yes	Prospective	Serum	Prior to cyst puncture by Surgery			PDAC	Yes	4	CA19-9	IL-8 & CA19-9 & IL-6 & IP-10	Multi-marker panel	Yes	PDAC vs Benign	127	71	56				Histology	No	Moderately Differentiated (45), Poorly Differentiated (26), Well Differentiated (15)	No									49	Chronic pancreatitis	30	19
#1765	PMID: 24884871	Serum cytokine biomarker panels for discriminating pancreatic cancer from benign pancreatic disease	Eithne Costello	ecostell@liverpool.ac.uk	UK	This work was supported by The National Institute for Health Research Pancreas Biomedical Research Unit, Cancer Research UK grant A12790 and Pancreatic Cancer UK	None Declared	Yes	Prospective	Serum	Prior to cyst puncture by Surgery			PDAC	Yes	1	CA19-9	CA19-9	Single marker	Yes	PDAC vs Benign	127	71	56				Histology	No	Moderately Differentiated (45), Poorly Differentiated (26), Well Differentiated (15)	No									49	Chronic pancreatitis	30	19
#1765	PMID: 24884871	Serum cytokine biomarker panels for discriminating pancreatic cancer from benign pancreatic disease	Eithne Costello	ecostell@liverpool.ac.uk	UK	This work was supported by The National Institute for Health Research Pancreas Biomedical Research Unit, Cancer Research UK grant A12790 and Pancreatic Cancer UK	None Declared	Yes	Prospective	Serum	Prior to cyst puncture by Surgery			PDAC	Yes	4	Novel	IP-10 & IL-8 & IL-1b & PDGF	Multi-marker panel	Yes	PDAC vs Benign	55						Histology	No	Serum bilirubin levels ≥ 20 μmol/L	No
#1765	PMID: 24884871	Serum cytokine biomarker panels for discriminating pancreatic cancer from benign pancreatic disease	Eithne Costello	ecostell@liverpool.ac.uk	UK	This work was supported by The National Institute for Health Research Pancreas Biomedical Research Unit, Cancer Research UK grant A12790 and Pancreatic Cancer UK	None Declared	Yes	Prospective	Serum	Prior to cyst puncture by Surgery			PDAC	Yes	1	CA19-9	CA19-9	Single marker	Yes	PDAC vs Benign	55						Histology	No	Serum bilirubin levels ≥ 20 μmol/L	No
#1765	PMID: 24884871	Serum cytokine biomarker panels for discriminating pancreatic cancer from benign pancreatic disease	Eithne Costello	ecostell@liverpool.ac.uk	UK	This work was supported by The National Institute for Health Research Pancreas Biomedical Research Unit, Cancer Research UK grant A12790 and Pancreatic Cancer UK	None Declared	Yes	Prospective	Serum	Prior to cyst puncture by Surgery			PDAC	Yes	4	Novel	IP-10 & IL-8 & IL-1b & PDGF	Multi-marker panel	Yes	PDAC vs Benign	83						Histology	No	Serum bilirubin levels ≥ 20 μmol/L	No
#1765	PMID: 24884871	Serum cytokine biomarker panels for discriminating pancreatic cancer from benign pancreatic disease	Eithne Costello	ecostell@liverpool.ac.uk	UK	This work was supported by The National Institute for Health Research Pancreas Biomedical Research Unit, Cancer Research UK grant A12790 and Pancreatic Cancer UK	None Declared	Yes	Prospective	Serum	Prior to cyst puncture by Surgery			PDAC	Yes	1	CA19-9	CA19-9	Single marker	Yes	PDAC vs Benign	83						Histology	No	Serum bilirubin levels ≥ 20 μmol/L	No
#1008	PMID: 19065635	Methylation profile of circulating plasma DNA in patients with pancreatic cancer	Victor V. Levenson	Victor_Levenson@rush.edu	USA	This work was supported in part by Illinois Department of Public Health, Penny Severns Breast, Cervical, and Ovarian Cancer Research Fund Award to V.V.L	Not mentioned	Yes	Prospective	Plasma	Prior to cyst puncture by Surgery			PDAC	Yes	5	Novel	CCND2 & SOCS1 & THBS1 & PLAU & VHL	Multi-marker panel	No	PDAC vs Healthy	30	0	30	36-83		63.8	Pathology	No	Resectable (25): Stage IA or IB (2), Stage II (17), Stage III (2), Stage IV (4). Unresectable (9): Vessel encasement (2), metastatic (7).	No		30	0	30	36-81		63.8	Control samples were from healthy Caucasian individuals with no history of cancer. Cases and controls were age-matched
#1799	PMID: 24832178	Evaluation of cell-free DNA as a biomarker for pancreatic malignancies	Matteo Fassan	matteo.fassan@gmail.com	Italy	Supported by the Italian Association for Cancer (AIRC grants n. 12182, 12214, 6421, and IG-11930) and the Italian Cancer Genome Project (FIRB RBAP10AHJB).	None Declared	Yes	Prospective	Plasma	Prior to cyst puncture by Surgery			PDAC	No	1	Novel	Alu83	Single marker	No	PDAC vs Healthy	50	28	22		68	65.1	Histopathology	No	Stage I (1), Stage II (41), Stage III (5), Stage IV (3)	No		23	10	13		60	55.9	Randomly sampled healthy blood donors
#1799	PMID: 24832178	Evaluation of cell-free DNA as a biomarker for pancreatic malignancies	Matteo Fassan	matteo.fassan@gmail.com	Italy	Supported by the Italian Association for Cancer (AIRC grants n. 12182, 12214, 6421, and IG-11930) and the Italian Cancer Genome Project (FIRB RBAP10AHJB).	None Declared	Yes	Prospective	Plasma	Prior to cyst puncture by Surgery			PDAC	No	1	Novel	Alu83	Single marker	No	PDAC vs Benign	50	28	22		68	65.1	Histopathology	No	Stage I (1), Stage II (41), Stage III (5), Stage IV (3)	No									20	Chronic pancreatitis	6	14		51	52.3	Randomly sampled
#2273	PMID: 28369140	Serological characteristics of autoimmune pancreatitis and its differential diagnosis from pancreatic cancer by using a combination of carbohydrate antigen 19-9, globulin, eosinophils and hemoglobin	Youming Li	zlym@zju.edu.cn	China	The authors received no specific funding for this work.	Not mentioned	Yes	Prospective	Serum	No details given	2009-11-01	2014-04-01	PDAC	Yes	1	CA19-9	CA19-9	Single marker	No	PDAC vs Benign	100	69	31	52-65	59		Pathology			Unsure									25	Autoimmune Pancreatitis	21	4	58-70	66
#2273	PMID: 28369140	Serological characteristics of autoimmune pancreatitis and its differential diagnosis from pancreatic cancer by using a combination of carbohydrate antigen 19-9, globulin, eosinophils and hemoglobin	Youming Li	zlym@zju.edu.cn	China	The authors received no specific funding for this work.	Not mentioned	Yes	Prospective	Serum	No details given	2009-11-01	2014-04-01	PDAC	Yes	1	Novel	Globulin	Single marker	No	PDAC vs Benign	100	69	31	52-66	59		Pathology			Unsure									25	Autoimmune Pancreatitis	21	4	58-71	66
#2273	PMID: 28369140	Serological characteristics of autoimmune pancreatitis and its differential diagnosis from pancreatic cancer by using a combination of carbohydrate antigen 19-9, globulin, eosinophils and hemoglobin	Youming Li	zlym@zju.edu.cn	China	The authors received no specific funding for this work.	Not mentioned	Yes	Prospective	Serum	No details given	2009-11-01	2014-04-01	PDAC	Yes	1	Novel	% Eosinophils	Single marker	No	PDAC vs Benign	100	69	31	52-67	59		Pathology			Unsure									25	Autoimmune Pancreatitis	21	4	58-72	66
#2273	PMID: 28369140	Serological characteristics of autoimmune pancreatitis and its differential diagnosis from pancreatic cancer by using a combination of carbohydrate antigen 19-9, globulin, eosinophils and hemoglobin	Youming Li	zlym@zju.edu.cn	China	The authors received no specific funding for this work.	Not mentioned	Yes	Prospective	Serum	No details given	2009-11-01	2014-04-01	PDAC	Yes	1	Novel	Hemoglobin	Single marker	No	PDAC vs Benign	100	69	31	52-68	59		Pathology			Unsure									25	Autoimmune Pancreatitis	21	4	58-73	66
#2273	PMID: 28369140	Serological characteristics of autoimmune pancreatitis and its differential diagnosis from pancreatic cancer by using a combination of carbohydrate antigen 19-9, globulin, eosinophils and hemoglobin	Youming Li	zlym@zju.edu.cn	China	The authors received no specific funding for this work.	Not mentioned	Yes	Prospective	Serum	No details given	2009-11-01	2014-04-01	PDAC	Yes	1	Novel	Direct Bilirubin (DBIL)	Single marker	No	PDAC vs Benign	100	69	31	52-69	59		Pathology			Unsure									25	Autoimmune Pancreatitis	21	4	58-74	66
#2273	PMID: 28369140	Serological characteristics of autoimmune pancreatitis and its differential diagnosis from pancreatic cancer by using a combination of carbohydrate antigen 19-9, globulin, eosinophils and hemoglobin	Youming Li	zlym@zju.edu.cn	China	The authors received no specific funding for this work.	Not mentioned	Yes	Prospective	Serum	No details given	2009-11-01	2014-04-01	PDAC	Yes	1	Novel	Alkaline Phosphatase (ALP)	Single marker	No	PDAC vs Benign	100	69	31	52-70	59		Pathology			Unsure									25	Autoimmune Pancreatitis	21	4	58-75	66
#2273	PMID: 28369140	Serological characteristics of autoimmune pancreatitis and its differential diagnosis from pancreatic cancer by using a combination of carbohydrate antigen 19-9, globulin, eosinophils and hemoglobin	Youming Li	zlym@zju.edu.cn	China	The authors received no specific funding for this work.	Not mentioned	Yes	Prospective	Serum	No details given	2009-11-01	2014-04-01	PDAC	Yes	1	Novel	Alanine Aminotransferase (ALT)	Single marker	No	PDAC vs Benign	100	69	31	52-71	59		Pathology			Unsure									25	Autoimmune Pancreatitis	21	4	58-76	66
#2273	PMID: 28369140	Serological characteristics of autoimmune pancreatitis and its differential diagnosis from pancreatic cancer by using a combination of carbohydrate antigen 19-9, globulin, eosinophils and hemoglobin	Youming Li	zlym@zju.edu.cn	China	The authors received no specific funding for this work.	Not mentioned	Yes	Prospective	Serum	No details given	2009-11-01	2014-04-01	PDAC	Yes	1	Novel	Asparatate Aminotransferase (AST)	Single marker	No	PDAC vs Benign	100	69	31	52-72	59		Pathology			Unsure									25	Autoimmune Pancreatitis	21	4	58-77	66
#2273	PMID: 28369140	Serological characteristics of autoimmune pancreatitis and its differential diagnosis from pancreatic cancer by using a combination of carbohydrate antigen 19-9, globulin, eosinophils and hemoglobin	Youming Li	zlym@zju.edu.cn	China	The authors received no specific funding for this work.	Not mentioned	Yes	Prospective	Serum	No details given	2009-11-01	2014-04-01	PDAC	Yes	1	Novel	γ-glutamyltransferase (GGT)	Single marker	No	PDAC vs Benign	100	69	31	52-73	59		Pathology			Unsure									25	Autoimmune Pancreatitis	21	4	58-78	66
#2273	PMID: 28369140	Serological characteristics of autoimmune pancreatitis and its differential diagnosis from pancreatic cancer by using a combination of carbohydrate antigen 19-9, globulin, eosinophils and hemoglobin	Youming Li	zlym@zju.edu.cn	China	The authors received no specific funding for this work.	Not mentioned	Yes	Prospective	Serum	No details given	2009-11-01	2014-04-01	PDAC	Yes	4	CA19-9	CA19-9 & Globulin & % Eosinophils & Hemoglobin	Multi-marker panel	No	PDAC vs Benign	100	69	31	52-74	59		Pathology			Unsure									25	Autoimmune Pancreatitis	21	4	58-79	66
#4125	PMID: 29756486	Osteonectin as a screening marker for pancreatic cancer: A prospective study	Angeliki Papapanagiotou	agpana@med.uoa.gr	Greece	This research received no specific grant from any funding agency in the public, commercial, or not-for-profit sectors.	None Declared	Yes	Prospective	Serum	No details given	2013-12-01	2015-01-01	PDAC	No	1	Novel	Osteonectin	Single marker	No	PDAC vs Healthy	15	5	10			68.3	Histology	No	T1(3), T2(5), T3(3),T4(4)	Unsure		30	14	16			61.15	All healthy controls had normal findings of endoscopy, abdominal computed tomography, and mammography (for female patients) previously performed for various reasons upon study entry and underwent a repeat magnetic resonance imaging examination of the pancreas in January 2016 to check for the absence of pancreatic cancer.
#1018	PMID: 32033141	Plasma next generation sequencing and droplet digital-qpcr-based quantification of circulating cell-free rna for noninvasive early detection of cancer	Smiths S. Lueong	smiths-sengkwawoh.lueong@uk-essen.de	Germany	This work was funded by a European Transcan-2 project CEVIR and the German Cancer Consortium (DKTK). S.S.L. was partially supported by the Deutsche Forschungsgemeinschaft (DFG, German Research Foundation)—SI 1549/3-1 and RO 3577/7-1 (KFO 337). IC is supported by grant from the Wilhelm Sander stiftung (2017.148.1). RV was partially supported by the European Union’s Horizon 2020 research and innova…	None Declared	Yes	Prospective	Serum	No details given			PDAC	Yes	1	Novel	cfRNA yield	Single marker	No	PDAC vs Healthy	20	11	9		70			No	Stage III	No		23						Samples from healthy blood donors were obtained from blood donors at the Department of Transfusion Medicine, University Hospital Essen.
#1018	PMID: 32033141	Plasma next generation sequencing and droplet digital-qpcr-based quantification of circulating cell-free rna for noninvasive early detection of cancer	Smiths S. Lueong	smiths-sengkwawoh.lueong@uk-essen.de	Germany	This work was funded by a European Transcan-2 project CEVIR and the German Cancer Consortium (DKTK). S.S.L. was partially supported by the Deutsche Forschungsgemeinschaft (DFG, German Research Foundation)—SI 1549/3-1 and RO 3577/7-1 (KFO 337). IC is supported by grant from the Wilhelm Sander stiftung (2017.148.1). RV was partially supported by the European Union’s Horizon 2020 research and innova…	None Declared	Yes	Prospective	Serum	No details given			PDAC	Yes	1	Novel	POU6F2-AS	Single marker	No	PDAC vs Healthy	20	11	9		70			No	Stage III	No		23						Samples from healthy blood donors were obtained from blood donors at the Department of Transfusion Medicine, University Hospital Essen.
#1005	PMID: 30106639	Serum biomarker signature-based liquid biopsy for diagnosis of early-stage pancreatic cancer	Carl A.K. Borrebaeck	carl.borrebaeck@immun.lth.se.	Denmark & USA	Immunovia AB	Several authors are co-inventors in a patent application submitted by Immunovia AB	Yes	Prospective	Serum	Prior to cyst puncture by Surgery			PDAC	Yes	29	Novel	Apolipoprotein A1 & Aprataxin & PNK-like factor & Calcineurin B homologous protein 1 & Calcium/calmodulin-dependent protein kinase type IV & Complement C3 & Complement C4 &Complement C5 & Cyclin-dependent kinase 2 & Disks large homolog 1 & GTP-binding protein GEM & HADH2 protein & Intercellular adhesion molecule 1 & Interferon gamma & Interleukin-13 & Interleukin-4 & Interleukin-6 & Lewis x & Lym…	Multi-marker panel	No	PDAC vs Healthy	148	84	64	37-88			Histology	No	Stage IA (10), Stage IB (6), Stage IIA (32), Stage IIB (100)	No		888	512	376	33-95	68
#1005	PMID: 30106639	Serum biomarker signature-based liquid biopsy for diagnosis of early-stage pancreatic cancer	Carl A.K. Borrebaeck	carl.borrebaeck@immun.lth.se.	Denmark & USA	Immunovia AB	Several authors are co-inventors in a patent application submitted by Immunovia AB	Yes	Prospective	Serum	Prior to cyst puncture by Surgery			PDAC	Yes	29	Novel	Apolipoprotein A1 & Aprataxin & PNK-like factor & Calcineurin B homologous protein 1 & Calcium/calmodulin-dependent protein kinase type IV & Complement C3 & Complement C4 &Complement C5 & Cyclin-dependent kinase 2 & Disks large homolog 1 & GTP-binding protein GEM & HADH2 protein & Intercellular adhesion molecule 1 & Interferon gamma & Interleukin-13 & Interleukin-4 & Interleukin-6 & Lewis x & Lym…	Multi-marker panel	No	PDAC vs Healthy	295	169	126	40-89			Histology	No	Stage III (65), Stage IV (230)	No		888	512	376	33-96	68
#1005	PMID: 30106639	Serum biomarker signature-based liquid biopsy for diagnosis of early-stage pancreatic cancer	Carl A.K. Borrebaeck	carl.borrebaeck@immun.lth.se.	Denmark & USA	Immunovia AB	Several authors are co-inventors in a patent application submitted by Immunovia AB	Yes	Prospective	Serum	Prior to cyst puncture by Surgery			PDAC	Yes	29	Novel	Apolipoprotein A1 & Aprataxin & PNK-like factor & Calcineurin B homologous protein 1 & Calcium/calmodulin-dependent protein kinase type IV & Complement C3 & Complement C4 &Complement C5 & Cyclin-dependent kinase 2 & Disks large homolog 1 & GTP-binding protein GEM & HADH2 protein & Intercellular adhesion molecule 1 & Interferon gamma & Interleukin-13 & Interleukin-4 & Interleukin-6 & Lewis x & Lym…	Multi-marker panel	No	PDAC vs Healthy	90	50	40	30-87			EUS-guided biopsy	No	Stage IA (5), Stage IB (10), Stage IIA (27), Stage IIB (48)	No		219	115	104	24-86	63
#1005	PMID: 30106639	Serum biomarker signature-based liquid biopsy for diagnosis of early-stage pancreatic cancer	Carl A.K. Borrebaeck	carl.borrebaeck@immun.lth.se.	Denmark & USA	Immunovia AB	Several authors are co-inventors in a patent application submitted by Immunovia AB	Yes	Prospective	Serum	Prior to cyst puncture by Surgery			PDAC	Yes	29	Novel	Apolipoprotein A1 & Aprataxin & PNK-like factor & Calcineurin B homologous protein 1 & Calcium/calmodulin-dependent protein kinase type IV & Complement C3 & Complement C4 &Complement C5 & Cyclin-dependent kinase 2 & Disks large homolog 1 & GTP-binding protein GEM & HADH2 protein & Intercellular adhesion molecule 1 & Interferon gamma & Interleukin-13 & Interleukin-4 & Interleukin-6 & Lewis x & Lym…	Multi-marker panel	No	PDAC vs Healthy	53	31	22	24-83			EUS-guided biopsy	No	Stage III (15), Stage IV (38)	No		219	115	104	24-87	63
#1324	PMID: 25393578	Quantitative Analysis of Single Amino Acid Variant Peptides Associated with Pancreatic Cancer in Serum by an Isobaric Labeling Quantitative Method	David M. Lubman	dmlubman@umich.edu.	USA	The National Cancer Institute through SPORE Program Grant 1 P50CA130810 (S.N., D.M.L., M.T.R.), Grants 1 R01 CA154455 (D.M.L) and R01 GM49500 (D.M.L).	None Declared	Not mentioned	Prospective	Serum	Prior to Treatment			PDAC	Yes	1	Novel	Variant peptide SDNCEDTPEAGYFAVAVVK from serotransferrin	Single marker	No	PDAC vs Benign	26	11	15	28-80		60		No	T1, NO = 2; T2, NO = 1; T2, N1 = 2; T3, NO = 3; T3, N1 = 5; T4, N1 = 3; IV = 10	No									25	Chronic pancreatitis	14	11	30-83		58
#1324	PMID: 25393578	Quantitative Analysis of Single Amino Acid Variant Peptides Associated with Pancreatic Cancer in Serum by an Isobaric Labeling Quantitative Method	David M. Lubman	dmlubman@umich.edu.	USA	The National Cancer Institute through SPORE Program Grant 1 P50CA130810 (S.N., D.M.L., M.T.R.), Grants 1 R01 CA154455 (D.M.L) and R01 GM49500 (D.M.L).	None Declared	Not mentioned	Prospective	Serum	Prior to Treatment			PDAC	Yes	1	Novel	Variant peptide SDNCEDTPEAGYFAVAVVK from serotransferrin	Single marker	No	PDAC vs Healthy	26	11	15	28-81		60		No	T1, NO = 2; T2, NO = 1; T2, N1 = 2; T3, NO = 3; T3, N1 = 5; T4, N1 = 3; IV = 11	No		27	12	15	28-89		60
#1324	PMID: 25393578	Quantitative Analysis of Single Amino Acid Variant Peptides Associated with Pancreatic Cancer in Serum by an Isobaric Labeling Quantitative Method	David M. Lubman	dmlubman@umich.edu.	USA	The National Cancer Institute through SPORE Program Grant 1 P50CA130810 (S.N., D.M.L., M.T.R.), Grants 1 R01 CA154455 (D.M.L) and R01 GM49500 (D.M.L).	None Declared	Not mentioned	Prospective	Serum	Prior to Treatment			PDAC	Yes	3	Novel	Variant peptide SDNCEDTPEAGYFAVAVVK from serotransferrin & α-1-antichymotrypsin (AACT) & Thrombospondin-1 (THBS1)	Multi-marker panel	No	PDAC vs Benign	26	11	15	28-82		60		No	T1, NO = 2; T2, NO = 1; T2, N1 = 2; T3, NO = 3; T3, N1 = 5; T4, N1 = 3; IV = 12	No									25	Chronic pancreatitis	14	11	30-83		58
#1324	PMID: 25393578	Quantitative Analysis of Single Amino Acid Variant Peptides Associated with Pancreatic Cancer in Serum by an Isobaric Labeling Quantitative Method	David M. Lubman	dmlubman@umich.edu.	USA	The National Cancer Institute through SPORE Program Grant 1 P50CA130810 (S.N., D.M.L., M.T.R.), Grants 1 R01 CA154455 (D.M.L) and R01 GM49500 (D.M.L).	None Declared	Not mentioned	Prospective	Serum	Prior to Treatment			PDAC	Yes	3	Novel	Variant peptide SDNCEDTPEAGYFAVAVVK from serotransferrin & α-1-antichymotrypsin (AACT) & Thrombospondin-1 (THBS1)	Multi-marker panel	No	PDAC vs Healthy	26	11	15	28-83		60		No	T1, NO = 2; T2, NO = 1; T2, N1 = 2; T3, NO = 3; T3, N1 = 5; T4, N1 = 3; IV = 13	No		27	12	15	28-89		60
#1324	PMID: 25393578	Quantitative Analysis of Single Amino Acid Variant Peptides Associated with Pancreatic Cancer in Serum by an Isobaric Labeling Quantitative Method	David M. Lubman	dmlubman@umich.edu.	USA	The National Cancer Institute through SPORE Program Grant 1 P50CA130810 (S.N., D.M.L., M.T.R.), Grants 1 R01 CA154455 (D.M.L) and R01 GM49500 (D.M.L).	None Declared	Not mentioned	Prospective	Serum	Prior to Treatment			PDAC	Yes	1	CA19-9	CA19-9	Single marker	No	PDAC vs Benign	26	11	15	28-84		60		No	T1, NO = 2; T2, NO = 1; T2, N1 = 2; T3, NO = 3; T3, N1 = 5; T4, N1 = 3; IV = 14	No									25	Chronic pancreatitis	14	11	30-83		58
#1324	PMID: 25393578	Quantitative Analysis of Single Amino Acid Variant Peptides Associated with Pancreatic Cancer in Serum by an Isobaric Labeling Quantitative Method	David M. Lubman	dmlubman@umich.edu.	USA	The National Cancer Institute through SPORE Program Grant 1 P50CA130810 (S.N., D.M.L., M.T.R.), Grants 1 R01 CA154455 (D.M.L) and R01 GM49500 (D.M.L).	None Declared	Not mentioned	Prospective	Serum	Prior to Treatment			PDAC	Yes	1	CA19-9	CA19-9	Single marker	No	PDAC vs Healthy	26	11	15	28-85		60		No	T1, NO = 2; T2, NO = 1; T2, N1 = 2; T3, NO = 3; T3, N1 = 5; T4, N1 = 3; IV = 15	No		27	12	15	28-89		60
#1324	PMID: 25393578	Quantitative Analysis of Single Amino Acid Variant Peptides Associated with Pancreatic Cancer in Serum by an Isobaric Labeling Quantitative Method	David M. Lubman	dmlubman@umich.edu.	USA	The National Cancer Institute through SPORE Program Grant 1 P50CA130810 (S.N., D.M.L., M.T.R.), Grants 1 R01 CA154455 (D.M.L) and R01 GM49500 (D.M.L).	None Declared	Not mentioned	Prospective	Serum	Prior to Treatment			PDAC	Yes	4	CA19-9	Variant peptide SDNCEDTPEAGYFAVAVVK from serotransferrin & α-1-antichymotrypsin (AACT) & Thrombospondin-1 (THBS1) & CA19-9	Multi-marker panel	No	PDAC vs Benign	26	11	15	28-86		60		No	T1, NO = 2; T2, NO = 1; T2, N1 = 2; T3, NO = 3; T3, N1 = 5; T4, N1 = 3; IV = 16	No									25	Chronic pancreatitis	14	11	30-83		58
#1324	PMID: 25393578	Quantitative Analysis of Single Amino Acid Variant Peptides Associated with Pancreatic Cancer in Serum by an Isobaric Labeling Quantitative Method	David M. Lubman	dmlubman@umich.edu.	USA	The National Cancer Institute through SPORE Program Grant 1 P50CA130810 (S.N., D.M.L., M.T.R.), Grants 1 R01 CA154455 (D.M.L) and R01 GM49500 (D.M.L).	None Declared	Not mentioned	Prospective	Serum	Prior to Treatment			PDAC	Yes	4	CA19-9	Variant peptide SDNCEDTPEAGYFAVAVVK from serotransferrin & α-1-antichymotrypsin (AACT) & Thrombospondin-1 (THBS1) & CA19-9	Multi-marker panel	No	PDAC vs Healthy	26	11	15	28-87		60		No	T1, NO = 2; T2, NO = 1; T2, N1 = 2; T3, NO = 3; T3, N1 = 5; T4, N1 = 3; IV = 17	No		27	12	15	28-89		60
#6927	PMID: 33791157	Serum tRNA-derived small RNAs as potential novel diagnostic biomarkers for Pancreatic Ductal Adenocarcinoma	Hao Chen	rjchenhao@163.com	China	This work was supported by the National Nature Science Foundation of China (grant NOs. 81672325 & 81802316).	Not mentioned	Yes	Prospective	Serum	No details given	2016	2019	PDAC	Yes	1	Novel	tsRNA-ValTAC-41	Single marker	No	PDAC vs Healthy	110	75	35	48-73		63.3	histopathology	No	Stage I (24), Stage II (36), Stage III (18), Stage IV (22), (10)	No		100	47	53	21-63		34.19
#6927	PMID: 33791157	Serum tRNA-derived small RNAs as potential novel diagnostic biomarkers for Pancreatic Ductal Adenocarcinoma	Hao Chen	rjchenhao@163.com	China	This work was supported by the National Nature Science Foundation of China (grant NOs. 81672325 & 81802316).	Not mentioned	Yes	Prospective	Serum	No details given	2016	2019	PDAC	Yes	1	Novel	tsRNA-MetCAT-37	Single marker	No	PDAC vs Healthy	110	75	35	48-74		63.3	histopathology	No	Stage I (24), Stage II (36), Stage III (18), Stage IV (22), (10)	No		100	47	53	21-64		34.19
#6927	PMID: 33791157	Serum tRNA-derived small RNAs as potential novel diagnostic biomarkers for Pancreatic Ductal Adenocarcinoma	Hao Chen	rjchenhao@163.com	China	This work was supported by the National Nature Science Foundation of China (grant NOs. 81672325 & 81802316).	Not mentioned	Yes	Prospective	Serum	No details given	2016	2019	PDAC	Yes	1	Novel	tsRNA-ThrTGT-23	Single marker	No	PDAC vs Healthy	110	75	35	48-75		63.3	histopathology	No	Stage I (24), Stage II (36), Stage III (18), Stage IV (22), (10)	No		100	47	53	21-65		34.19
#6927	PMID: 33791157	Serum tRNA-derived small RNAs as potential novel diagnostic biomarkers for Pancreatic Ductal Adenocarcinoma	Hao Chen	rjchenhao@163.com	China	This work was supported by the National Nature Science Foundation of China (grant NOs. 81672325 & 81802316).	Not mentioned	Yes	Prospective	Serum	No details given	2016	2019	PDAC	Yes	2	CA19-9	tsRNA-ValTAC-41 & CA19-9	Multi-marker panel	No	PDAC vs Healthy	110	75	35	48-76		63.3	histopathology	No	Stage I (24), Stage II (36), Stage III (18), Stage IV (22), (10)	No		100	47	53	21-66		34.19
#6927	PMID: 33791157	Serum tRNA-derived small RNAs as potential novel diagnostic biomarkers for Pancreatic Ductal Adenocarcinoma	Hao Chen	rjchenhao@163.com	China	This work was supported by the National Nature Science Foundation of China (grant NOs. 81672325 & 81802316).	Not mentioned	Yes	Prospective	Serum	No details given	2016	2019	PDAC	Yes	2	CA19-9	tsRNA-MetCAT-37 & CA19-9	Multi-marker panel	No	PDAC vs Healthy	110	75	35	48-77		63.3	histopathology	No	Stage I (24), Stage II (36), Stage III (18), Stage IV (22), (10)	No		100	47	53	21-67		34.19
#6927	PMID: 33791157	Serum tRNA-derived small RNAs as potential novel diagnostic biomarkers for Pancreatic Ductal Adenocarcinoma	Hao Chen	rjchenhao@163.com	China	This work was supported by the National Nature Science Foundation of China (grant NOs. 81672325 & 81802316).	Not mentioned	Yes	Prospective	Serum	No details given	2016	2019	PDAC	Yes	1	CA19-9	CA19-9	Single marker	No	PDAC vs Healthy	110	75	35	48-78		63.3	histopathology	No	Stage I (24), Stage II (36), Stage III (18), Stage IV (22), (10)	No		100	47	53	21-68		34.19
#987	PMID: 28108468	Metabolic biomarker signature to differentiate pancreatic ductal adenocarcinoma from chronic pancreatitis	Markus M Lerch	lerch@uni-greifswald.de	Germany	Supported by the Deutsche Krebshilfe/Dr. Mildred-Scheel-Stiftung (109102), the Deutsche Forschungsgemeinschaft (DFG MA 4115/1-2/3), the Federal Ministry of Education and Research (BMBF GANI-MED 03IS2061A and BMBF 0314107, 01ZZ9603, 01ZZ0103, 01ZZ0403, 03ZIK012) the European Union (EU-FP-7: EPC-TM), the Wilhelm Sander Stiftung (2009.039.2) and EFRE-State Ministry of Economics MV (V-630-S-150-2012/…	None Declared	Yes	Prospective	Plasma	No details given			PDAC	Yes	10	CA19-9	Proline & Sphingomyelin & Phosphatidylcholine & Isocitrate & Sphinganine-1-phosphate & Histidine & Pyruvate & Ceramide & Sphingomyelin & CA19-9	Multi-marker panel	No	PDAC vs Benign	78						Histology/Cytology	No		No									80	Chronic pancreatitis
#987	PMID: 28108468	Metabolic biomarker signature to differentiate pancreatic ductal adenocarcinoma from chronic pancreatitis	Markus M Lerch	lerch@uni-greifswald.de	Germany	Supported by the Deutsche Krebshilfe/Dr. Mildred-Scheel-Stiftung (109102), the Deutsche Forschungsgemeinschaft (DFG MA 4115/1-2/3), the Federal Ministry of Education and Research (BMBF GANI-MED 03IS2061A and BMBF 0314107, 01ZZ9603, 01ZZ0103, 01ZZ0403, 03ZIK012) the European Union (EU-FP-7: EPC-TM), the Wilhelm Sander Stiftung (2009.039.2) and EFRE-State Ministry of Economics MV (V-630-S-150-2012/…	None Declared	Yes	Prospective	Plasma	No details given			PDAC	Yes	10	CA19-9	Proline & Sphingomyelin & Phosphatidylcholine & Isocitrate & Sphinganine-1-phosphate & Histidine & Pyruvate & Ceramide & Sphingomyelin & CA19-9	Multi-marker panel	No	PDAC vs Benign	79	37	42		69		Histology/Cytology	No	Stage IA (1), Stage IB (0), Stage IIA (11), Stage IIB (28), Stage III (26), Stage IV (13)	No									80	Chronic pancreatitis	62	18		51
#987	PMID: 28108468	Metabolic biomarker signature to differentiate pancreatic ductal adenocarcinoma from chronic pancreatitis	Markus M Lerch	lerch@uni-greifswald.de	Germany	Supported by the Deutsche Krebshilfe/Dr. Mildred-Scheel-Stiftung (109102), the Deutsche Forschungsgemeinschaft (DFG MA 4115/1-2/3), the Federal Ministry of Education and Research (BMBF GANI-MED 03IS2061A and BMBF 0314107, 01ZZ9603, 01ZZ0103, 01ZZ0403, 03ZIK012) the European Union (EU-FP-7: EPC-TM), the Wilhelm Sander Stiftung (2009.039.2) and EFRE-State Ministry of Economics MV (V-630-S-150-2012/…	None Declared	Yes	Prospective	Plasma	No details given			PDAC	Yes	1	CA19-9	CA19-9	Single marker	No	PDAC vs Benign	79	37	42		69		Histology/Cytology	No	Stage IA (1), Stage IB (0), Stage IIA (11), Stage IIB (28), Stage III (26), Stage IV (13)	No									80	Chronic pancreatitis	62	18		51
#987	PMID: 28108468	Metabolic biomarker signature to differentiate pancreatic ductal adenocarcinoma from chronic pancreatitis	Markus M Lerch	lerch@uni-greifswald.de	Germany	Supported by the Deutsche Krebshilfe/Dr. Mildred-Scheel-Stiftung (109102), the Deutsche Forschungsgemeinschaft (DFG MA 4115/1-2/3), the Federal Ministry of Education and Research (BMBF GANI-MED 03IS2061A and BMBF 0314107, 01ZZ9603, 01ZZ0103, 01ZZ0403, 03ZIK012) the European Union (EU-FP-7: EPC-TM), the Wilhelm Sander Stiftung (2009.039.2) and EFRE-State Ministry of Economics MV (V-630-S-150-2012/…	None Declared	Yes	Prospective	Serum	No details given			PDAC	Yes	10	CA19-9	Proline & Sphingomyelin & Phosphatidylcholine & Isocitrate & Sphinganine-1-phosphate & Histidine & Pyruvate & Ceramide & Sphingomyelin & CA19-9	Multi-marker panel	No	PDAC vs Healthy	78						Histology/Cytology	No		No		80	42	38		68		Non-pancreatic
#987	PMID: 28108468	Metabolic biomarker signature to differentiate pancreatic ductal adenocarcinoma from chronic pancreatitis	Markus M Lerch	lerch@uni-greifswald.de	Germany	Supported by the Deutsche Krebshilfe/Dr. Mildred-Scheel-Stiftung (109102), the Deutsche Forschungsgemeinschaft (DFG MA 4115/1-2/3), the Federal Ministry of Education and Research (BMBF GANI-MED 03IS2061A and BMBF 0314107, 01ZZ9603, 01ZZ0103, 01ZZ0403, 03ZIK012) the European Union (EU-FP-7: EPC-TM), the Wilhelm Sander Stiftung (2009.039.2) and EFRE-State Ministry of Economics MV (V-630-S-150-2012/…	None Declared	Yes	Prospective	Plasma	No details given			PDAC	Yes	10	CA19-9	Proline & Sphingomyelin & Phosphatidylcholine & Isocitrate & Sphinganine-1-phosphate & Histidine & Pyruvate & Ceramide & Sphingomyelin & CA19-9	Multi-marker panel	No	PDAC vs Healthy	79	37	42		69		Histology/Cytology	No	Stage IA (1), Stage IB (0), Stage IIA (11), Stage IIB (28), Stage III (26), Stage IV (13)	No		80	42	38		68		Non-pancreatic
#1118	PMID: 29171983	Growth differentiation factor (GDF-15) concentration combined with Ca125 levels in serum is superior to commonly used cancer biomarkers in differentiation of pancreatic mass	Piotr Hogendorf	piotr. hogendorf@umed.lodz.pl.	Poland	Not given	None Declared	Yes	Prospective	Serum	Prior to cyst puncture by Surgery			PDAC	Yes	1	Novel	Growth differentiation factor 15 (GDF-15)	Single marker	No	PDAC vs Benign	42	15	27			63.17	Pathology	No	Stage IA (0), Stage IB (3), Stage IIA (7), Stage IIB (9), Stage III (9), Stage IV (14)	No									21	Chronic pancreatitis	13	8			53.5
#1118	PMID: 29171983	Growth differentiation factor (GDF-15) concentration combined with Ca125 levels in serum is superior to commonly used cancer biomarkers in differentiation of pancreatic mass	Piotr Hogendorf	piotr. hogendorf@umed.lodz.pl.	Poland	Not given	None Declared	Yes	Prospective	Serum	Prior to cyst puncture by Surgery			PDAC	Yes	1	CA19-9	CA19-9	Single marker	No	PDAC vs Benign	42	15	27			63.17	Pathology	No	Stage IA (0), Stage IB (3), Stage IIA (7), Stage IIB (9), Stage III (9), Stage IV (14)	No									21	Chronic pancreatitis	13	8			53.5
#1118	PMID: 29171983	Growth differentiation factor (GDF-15) concentration combined with Ca125 levels in serum is superior to commonly used cancer biomarkers in differentiation of pancreatic mass	Piotr Hogendorf	piotr. hogendorf@umed.lodz.pl.	Poland	Not given	None Declared	Yes	Prospective	Serum	Prior to cyst puncture by Surgery			PDAC	Yes	1	Novel	CA125	Single marker	No	PDAC vs Benign	42	15	27			63.17	Pathology	No	Stage IA (0), Stage IB (3), Stage IIA (7), Stage IIB (9), Stage III (9), Stage IV (14)	No									21	Chronic pancreatitis	13	8			53.5
#1118	PMID: 29171983	Growth differentiation factor (GDF-15) concentration combined with Ca125 levels in serum is superior to commonly used cancer biomarkers in differentiation of pancreatic mass	Piotr Hogendorf	piotr. hogendorf@umed.lodz.pl.	Poland	Not given	None Declared	Yes	Prospective	Serum	Prior to cyst puncture by Surgery			PDAC	Yes	1	Novel	CEA	Single marker	No	PDAC vs Benign	42	15	27			63.17	Pathology	No	Stage IA (0), Stage IB (3), Stage IIA (7), Stage IIB (9), Stage III (9), Stage IV (14)	No									21	Chronic pancreatitis	13	8			53.5
#1118	PMID: 29171983	Growth differentiation factor (GDF-15) concentration combined with Ca125 levels in serum is superior to commonly used cancer biomarkers in differentiation of pancreatic mass	Piotr Hogendorf	piotr. hogendorf@umed.lodz.pl.	Poland	Not given	None Declared	Yes	Prospective	Serum	Prior to cyst puncture by Surgery			PDAC	Yes	2	Novel	Growth differentiation factor 15 (GDF-15) & CEA	Multi-marker panel	No	PDAC vs Benign	42	15	27			63.17	Pathology	No	Stage IA (0), Stage IB (3), Stage IIA (7), Stage IIB (9), Stage III (9), Stage IV (14)	No									21	Chronic pancreatitis	13	8			53.5
#2714	PMID: 24261855	Extracellular matrix specific protein fingerprints measured in serum can separate pancreatic cancer patients from healthy controls	Nicholas Willumsen	nwi@nordicbioscience.com	Denmark	Not given	Willumsen N., Bager C.L., Leeming D.J., Karsdal M.A., and Bay-Jensen A.C. are employed at Nordic Bioscience A/S which is involved in the discovery and development of biochemical markers. Karsdal M.A. owns stocks at Nordic Bioscience. Smith, V. and Dornan, D. are employed at Gilead Sciences Inc. involved in drug development.	No	Retrospective	Serum	No details given			PDAC	Yes	1	Novel	MMP-2/-9/-13 mediated degradation of type I collagen (C1M)	Single marker	Yes	PDAC vs Healthy	15	9	6	48-84		65		No	Stage I (3), Stage II (8), Stage III (1), Stage IV (0), Unknown (3)	Unsure		33	16	17	43-78		61
#2714	PMID: 24261855	Extracellular matrix specific protein fingerprints measured in serum can separate pancreatic cancer patients from healthy controls	Nicholas Willumsen	nwi@nordicbioscience.com	Denmark	Not given	Willumsen N., Bager C.L., Leeming D.J., Karsdal M.A., and Bay-Jensen A.C. are employed at Nordic Bioscience A/S which is involved in the discovery and development of biochemical markers. Karsdal M.A. owns stocks at Nordic Bioscience. Smith, V. and Dornan, D. are employed at Gilead Sciences Inc. involved in drug development.	No	Retrospective	Serum	No details given			PDAC	Yes	1	Novel	MMP-9 mediated degradation of type III collagen (C3M)	Single marker	Yes	PDAC vs Healthy	15	9	6	48-85		65		No	Stage I (3), Stage II (8), Stage III (1), Stage IV (0), Unknown (3)	Unsure		33	16	17	43-79		61
#2714	PMID: 24261855	Extracellular matrix specific protein fingerprints measured in serum can separate pancreatic cancer patients from healthy controls	Nicholas Willumsen	nwi@nordicbioscience.com	Denmark	Not given	Willumsen N., Bager C.L., Leeming D.J., Karsdal M.A., and Bay-Jensen A.C. are employed at Nordic Bioscience A/S which is involved in the discovery and development of biochemical markers. Karsdal M.A. owns stocks at Nordic Bioscience. Smith, V. and Dornan, D. are employed at Gilead Sciences Inc. involved in drug development.	No	Retrospective	Serum	No details given			PDAC	Yes	1	Novel	MMP-9 mediated degradation of type IV collagen (C4M)	Single marker	Yes	PDAC vs Healthy	15	9	6	48-86		65		No	Stage I (3), Stage II (8), Stage III (1), Stage IV (0), Unknown (3)	Unsure		33	16	17	43-80		61
#2714	PMID: 24261855	Extracellular matrix specific protein fingerprints measured in serum can separate pancreatic cancer patients from healthy controls	Nicholas Willumsen	nwi@nordicbioscience.com	Denmark	Not given	Willumsen N., Bager C.L., Leeming D.J., Karsdal M.A., and Bay-Jensen A.C. are employed at Nordic Bioscience A/S which is involved in the discovery and development of biochemical markers. Karsdal M.A. owns stocks at Nordic Bioscience. Smith, V. and Dornan, D. are employed at Gilead Sciences Inc. involved in drug development.	No	Retrospective	Serum	No details given			PDAC	Yes	1	Novel	MMP-12 mediated degradation of type IV collagen (C4M12a1)	Single marker	Yes	PDAC vs Healthy	15	9	6	48-87		65		No	Stage I (3), Stage II (8), Stage III (1), Stage IV (0), Unknown (3)	Unsure		33	16	17	43-81		61
#2714	PMID: 24261855	Extracellular matrix specific protein fingerprints measured in serum can separate pancreatic cancer patients from healthy controls	Nicholas Willumsen	nwi@nordicbioscience.com	Denmark	Not given	Willumsen N., Bager C.L., Leeming D.J., Karsdal M.A., and Bay-Jensen A.C. are employed at Nordic Bioscience A/S which is involved in the discovery and development of biochemical markers. Karsdal M.A. owns stocks at Nordic Bioscience. Smith, V. and Dornan, D. are employed at Gilead Sciences Inc. involved in drug development.	No	Retrospective	Serum	No details given			PDAC	Yes	4	Novel	MMP-2/-9/-13 mediated degradation of type I collagen (C1M) & MMP-9 mediated degradation of type III collagen (C3M)& MMP-9 mediated degradation of type IV collagen (C4M) & MMP-12 mediated degradation of type IV collagen (C4M12a1)	Multi-marker panel	Yes	PDAC vs Healthy	15	9	6	48-88		65		No	Stage I (3), Stage II (8), Stage III (1), Stage IV (0), Unknown (3)	Unsure		33	16	17	43-82		61
#4257	PMID: 30728413	Elevated serum levels of bone sialoprotein (BSP) predict longterm mortality in patients with pancreatic adenocarcinoma	Christoph Roderburg	croderburg@ukaachen.de	Germany	Not given	None Declared	Yes	Prospective	Serum	Prior to cyst puncture by Surgery	2011	2016	PDAC	Yes	1	Novel	Bone sialoprotein (BSP)	Single marker	No	PDAC vs Healthy	132	84	48	41-84	68		Histopathology	No	T1 (5), T2 (5), T3 (115), T4 (7)	No		39						Healthy, cancer-free blood donors with normal values for blood counts, C-reactive protein, kidney and liver function
#4257	PMID: 30728413	Elevated serum levels of bone sialoprotein (BSP) predict longterm mortality in patients with pancreatic adenocarcinoma	Christoph Roderburg	croderburg@ukaachen.de	Germany	Not given	None Declared	Yes	Prospective	Serum	Prior to cyst puncture by Surgery	2011	2016	PDAC	Yes	1	CA19-9	CA19-9	Single marker	No	PDAC vs Healthy	132	84	48	41-85	68		Histopathology	No	T1 (5), T2 (5), T3 (115), T4 (7)	No		39						Healthy, cancer-free blood donors with normal values for blood counts, C-reactive protein, kidney and liver function
#4257	PMID: 30728413	Elevated serum levels of bone sialoprotein (BSP) predict longterm mortality in patients with pancreatic adenocarcinoma	Christoph Roderburg	croderburg@ukaachen.de	Germany	Not given	None Declared	Yes	Prospective	Serum	Prior to cyst puncture by Surgery	2011	2016	PDAC	Yes	1	Novel	CEA	Single marker	No	PDAC vs Healthy	132	84	48	41-86	68		Histopathology	No	T1 (5), T2 (5), T3 (115), T4 (7)	No		39						Healthy, cancer-free blood donors with normal values for blood counts, C-reactive protein, kidney and liver function
#4257	PMID: 30728413	Elevated serum levels of bone sialoprotein (BSP) predict longterm mortality in patients with pancreatic adenocarcinoma	Christoph Roderburg	croderburg@ukaachen.de	Germany	Not given	None Declared	Yes	Prospective	Serum	Prior to cyst puncture by Surgery	2011	2016	PDAC	Yes	2	CA19-9	Bone sialoprotein (BSP) & CA19-9	Multi-marker panel	No	PDAC vs Healthy	132	84	48	41-87	68		Histopathology	No	T1 (5), T2 (5), T3 (115), T4 (7)	No		39						Healthy, cancer-free blood donors with normal values for blood counts, C-reactive protein, kidney and liver function
#3237	PMID: 10975710	Elevated levels of opioid growth factor in the plasma of patients with pancreatic cancer	Jill P. Smith	jsmith2@ psghs.edu	USA	Supported by research grants from NIH CA66783 and CA80646, and the Laverty Foundation.	Not mentioned	Not mentioned	Prospective	Serum	Prior to Endoscopy			PDAC	No	1	Novel	Opioid Growth Factor (OGF)	Single marker	No	PDAC vs Healthy	15	6	9			64.5	Histology	No	Stage I (2), Stage II (4), Stage III (3), Stage IV (6)	No		30	12	18			55.6	Control subjects without malignancy who presented to an endoscopy suite for routine procedures
#3237	PMID: 10975710	Elevated levels of opioid growth factor in the plasma of patients with pancreatic cancer	Jill P. Smith	jsmith2@ psghs.edu	USA	Supported by research grants from NIH CA66783 and CA80646, and the Laverty Foundation.	Not mentioned	Not mentioned	Prospective	Serum	Prior to Endoscopy			PDAC	No	1	Novel	Opioid Growth Factor (OGF)	Single marker	No	PDAC vs Benign	15	6	9			64.5	Histology	No	Stage I (2), Stage II (4), Stage III (3), Stage IV (6)	No								Control subjects without malignancy who presented to an endoscopy suite for routine procedures	20	Acute pancreatitis	5	15			51.1	Patients with acute pancreatitis confirmed by laboratory evidence of elevated amylase and lipase, and inflamed pancreas as ascertained by computed tomographic scanning or endoscopic retrograde cholangiopancreatography
#1438	PMID: 7800337	Is CA 242 really a new tumour marker for pancreatic adenocarcinoma?	Mario Plebani		Italy	Supported by grant 394/01/93 'Diagnosi pre-coce del cancro di stomaco e pancreas' of the Veneto Region	Not mentioned	Not mentioned	Prospective	Serum	No details given			PDAC	Yes	1	Novel	CA242	Single marker	No	PDAC vs Healthy	27	17	10	39-81		N	Histology	No		Unsure		59	34	25	18-65			Healthy members of the medical staff or blood donors
#1438	PMID: 7800337	Is CA 242 really a new tumour marker for pancreatic adenocarcinoma?	Mario Plebani		Italy	Supported by grant 394/01/93 'Diagnosi pre-coce del cancro di stomaco e pancreas' of the Veneto Region	Not mentioned	Not mentioned	Prospective	Serum	No details given			PDAC	Yes	1	Novel	CA242	Single marker	No	PDAC vs Benign	27	17	10	39-82		N	Histology	No		Unsure									30	Other	15	15	38-73			Benign Hepatobiliary disease (20 liver cirrhosis, 8 bile duct stones, 1 primary biliary cirrhosis, 1 liver steatosis)
#1438	PMID: 7800337	Is CA 242 really a new tumour marker for pancreatic adenocarcinoma?	Mario Plebani		Italy	Supported by grant 394/01/93 'Diagnosi pre-coce del cancro di stomaco e pancreas' of the Veneto Region	Not mentioned	Not mentioned	Prospective	Serum	No details given			PDAC	Yes	1	Novel	CA242	Single marker	No	PDAC vs Benign	27	17	10	39-83		N	Histology	No		Unsure																	24	Other
#1438	PMID: 7800337	Is CA 242 really a new tumour marker for pancreatic adenocarcinoma?	Mario Plebani		Italy	Supported by grant 394/01/93 'Diagnosi pre-coce del cancro di stomaco e pancreas' of the Veneto Region	Not mentioned	Not mentioned	Prospective	Serum	No details given			PDAC	Yes	1	CA19-9	CA19-9	Single marker	No	PDAC vs Healthy	27	17	10	39-84		N	Histology	No		Unsure		59	34	25	18-65			Healthy members of the medical staff or blood donors
#1438	PMID: 7800337	Is CA 242 really a new tumour marker for pancreatic adenocarcinoma?	Mario Plebani		Italy	Supported by grant 394/01/93 'Diagnosi pre-coce del cancro di stomaco e pancreas' of the Veneto Region	Not mentioned	Not mentioned	Prospective	Serum	No details given			PDAC	Yes	1	CA19-9	CA19-9	Single marker	No	PDAC vs Benign	27	17	10	39-85		N	Histology	No		Unsure									30	Other	15	15	38-73			Benign Hepatobiliary disease (20 liver cirrhosis, 8 bile duct stones, 1 primary biliary cirrhosis, 1 liver steatosis)
#1438	PMID: 7800337	Is CA 242 really a new tumour marker for pancreatic adenocarcinoma?	Mario Plebani		Italy	Supported by grant 394/01/93 'Diagnosi pre-coce del cancro di stomaco e pancreas' of the Veneto Region	Not mentioned	Not mentioned	Prospective	Serum	No details given			PDAC	Yes	1	CA19-9	CA19-9	Single marker	No	PDAC vs Benign	27	17	10	39-86		N	Histology	No		Unsure																	24	Other
#4096	PMID: 10211419	Neopterin serum levels in pancreatic adenocarcinoma	Generoso Uomo	Postal(pre dates email)	Italy	Not given	None Declared	Not mentioned	Prospective	Serum	Prior to cyst puncture by Surgery	1999-01-01	2006-12-01	PC	Yes	1	Novel	Neoptorin	Single marker	not stated	PDAC vs Benign	34	21	13	37-79	54.1		histologically or cytologically	No	I(6), II(9), III(6), IV(13)	No	not stated								24	Chronic pancreatitis	17	7	29-59		45.4	I(6), II(12),III(6)
#4096	PMID: 10211419	Neopterin serum levels in pancreatic adenocarcinoma	Generoso Uomo	Postal(pre dates email)	Italy	Not given	None Declared	Not mentioned	Prospective	Serum	Prior to cyst puncture by Surgery	1999-01-01	2006-12-01	PC	Yes	1	Novel	TNF	Single marker	not stated	PDAC vs Benign	34	21	13	37-79	54.1		histologically or cytologically	No	I(6), II(9), III(6), IV(13)	No	not stated								24	Chronic pancreatitis	17	7	29-59		45.4	I(6), II(12),III(6)
#4096	PMID: 10211419	Neopterin serum levels in pancreatic adenocarcinoma	Generoso Uomo	Postal(pre dates email)	Italy	Not given	None Declared	Not mentioned	Prospective	Serum	Prior to cyst puncture by Surgery	1999-01-01	2006-12-01	PC	Yes	1	Novel	sIL-2R	Single marker	not stated	PDAC vs Benign	34	21	13	37-79	54.1		histologically or cytologically	No	I(6), II(9), III(6), IV(13)	No	not stated								24	Chronic pancreatitis	17	7	29-59		45.4	I(6), II(12),III(6)
#4096	PMID: 10211419	Neopterin serum levels in pancreatic adenocarcinoma	Generoso Uomo	Postal(pre dates email)	Italy	Not given	None Declared	Not mentioned	Prospective	Serum	Prior to cyst puncture by Surgery	2010-02-01	2013-07-01	PC	Yes	1	Novel	IL-6	Single marker	not stated	PDAC vs Benign	34	21	13	37-79	54.1		histologically or cytologically	No	I(6), II(9), III(6), IV(13)	No	not stated								24	Chronic pancreatitis	17	7	29-59		45.4	I(6), II(12),III(6)
#4096	PMID: 10211419	Neopterin serum levels in pancreatic adenocarcinoma	Generoso Uomo	Postal(pre dates email)	Italy	Not given	None Declared	Not mentioned	Prospective	Serum	Prior to cyst puncture by Surgery			PC	Yes	1	CA19-9	CA19-9	Single marker	not stated	PDAC vs Benign	34	21	13	37-79	54.1		histologically or cytologically	No	I(6), II(9), III(6), IV(13)	No	not stated								24	Chronic pancreatitis	17	7	29-59		45.4	I(6), II(12),III(6)
#4096	PMID: 10211419	Neopterin serum levels in pancreatic adenocarcinoma	Generoso Uomo	Postal(pre dates email)	Italy	Not given	None Declared	Not mentioned	Prospective	Serum	Prior to cyst puncture by Surgery			PC	Yes	1	Novel	Neoptorin	Single marker	not stated	PDAC vs Healthy	34	21	13	37-79	54.1		histologically or cytologically	No	I(6), II(9), III(6), IV(13)	No	not stated	72	40	32	29-59		49.2
#4096	PMID: 10211419	Neopterin serum levels in pancreatic adenocarcinoma	Generoso Uomo	Postal(pre dates email)	Italy	Not given	None Declared	Not mentioned	Prospective	Serum	Prior to cyst puncture by Surgery			PC	Yes	1	Novel	TNF	Single marker	not stated	PDAC vs Healthy	34	21	13	37-79	54.1		histologically or cytologically	No	I(6), II(9), III(6), IV(13)	No	not stated	72	40	32	29-59		49.2
#4096	PMID: 10211419	Neopterin serum levels in pancreatic adenocarcinoma	Generoso Uomo	Postal(pre dates email)	Italy	Not given	None Declared	Not mentioned	Prospective	Serum	Prior to cyst puncture by Surgery			PC	Yes	1	Novel	sIL-2R	Single marker	not stated	PDAC vs Healthy	34	21	13	37-79	54.1		histologically or cytologically	No	I(6), II(9), III(6), IV(13)	No	not stated	72	40	32	29-59		49.2
#4096	PMID: 10211419	Neopterin serum levels in pancreatic adenocarcinoma	Generoso Uomo	Postal(pre dates email)	Italy	Not given	None Declared	Not mentioned	Prospective	Serum	Prior to cyst puncture by Surgery			PC	Yes	1	Novel	IL-6	Single marker	not stated	PDAC vs Healthy	34	21	13	37-79	54.1		histologically or cytologically	No	I(6), II(9), III(6), IV(13)	No	not stated	72	40	32	29-59		49.2
#3867	PMID: 2613165	Tumor markers in pancreatic cancer. Sensitivity and specificity of CA 19-9	H G Beger	Postal(pre dates email)	Germany	Not given	None Declared	Not mentioned	Prospective	Serum	No details given			PC	No	1	CA19-9	CA19-9	Single marker	No	PDAC vs Benign	87						Histologically	No	I(4), II(22), III(61)	Unsure									165	Chronic pancreatitis/acute pancreatitis
#2860	PMID: 24385012	Serum level of Ca 19-9 increases ability of IgG4 test to distinguish patients with autoimmune pancreatitis from those with pancreatic carcinoma	MJ VanHeerde	mvanheerde@amphia.nl	Netherlands	Not given	None Declared	Yes	Prospective	Serum	No details given			PC	Yes	2	CA19-9	CA19-9 & IgG4 < 2.6 or IgG4 > 2.6	Multi-marker panel	no	PDAC vs Benign	53			60-71	66		Histologically												33	AIP			55-73	65
#2860	PMID: 24385012	Serum level of Ca 19-9 increases ability of IgG4 test to distinguish patients with autoimmune pancreatitis from those with pancreatic carcinoma	MJ VanHeerde	mvanheerde@amphia.nl	Netherlands	Not given	None Declared	Yes	Prospective	Serum	No details given			PC	Yes	2	CA19-9	CA19-9 & IgG4 < 2.6 or IgG4 > 2.6	Multi-marker panel	no	PDAC vs Benign	53			60-71	66		Histologically												33	AIP			55-73	65
#2860	PMID: 24385012	Serum level of Ca 19-9 increases ability of IgG4 test to distinguish patients with autoimmune pancreatitis from those with pancreatic carcinoma	MJ VanHeerde	mvanheerde@amphia.nl	Netherlands	Not given	None Declared	Yes	Prospective	Serum	No details given			PC	Yes	1	Novel	IgG4 (>1.4)	Single marker	no	PDAC vs Benign	53			60-71	66		Histologically												33	AIP			55-73	65
#2860	PMID: 24385012	Serum level of Ca 19-9 increases ability of IgG4 test to distinguish patients with autoimmune pancreatitis from those with pancreatic carcinoma	MJ VanHeerde	mvanheerde@amphia.nl	Netherlands	Not given	None Declared	Yes	Prospective	Serum	No details given			PC	Yes	1	Novel	IgG4(>2.6)	Single marker	no	PDAC vs Benign	53			60-71	66		Histologically												33	AIP			55-73	65
#2860	PMID: 24385012	Serum level of Ca 19-9 increases ability of IgG4 test to distinguish patients with autoimmune pancreatitis from those with pancreatic carcinoma	MJ VanHeerde	mvanheerde@amphia.nl	Netherlands	Not given	None Declared	Yes	Prospective	Serum	No details given	2007-03-01	2011-05-01	PC	Yes	1	CA19-9	CA19-9	Single marker	no	PDAC vs Benign	53			60-71	66		Histologically												33	AIP			55-73	65
#6628	PMID: 29588598	Measurement of serum PODXL concentration for detection of pancreatic cancer	Keisuke Taniuchi	ktaniuchi@kochi-u.ac.jp	Japan	Grant-in-Aid for Scientific Research (KAKENHI; 15K14396)	None Declared	Yes	prospective	serum	No details given	2007-03-01	2011-05-01	PDAC	yes	1	Novel	PODXL (cutoff 2.68ng/mL)	Single marker	No	PDAC vs Healthy	23	12	11	40-80			Histologically	no	Iia(2), Iib(4), III(6),IV(10)	no		51	22	29	39-80
#6628	PMID: 29588598	Measurement of serum PODXL concentration for detection of pancreatic cancer	Keisuke Taniuchi	ktaniuchi@kochi-u.ac.jp	Japan	Grant-in-Aid for Scientific Research (KAKENHI; 15K14396)	None Declared	Yes	prospective	serum	No details given	2007-03-01	2011-05-01	PDAC	yes	1	Novel	SCGB1D2 (cutoff 185.58ng/mL)	Single marker	No	PDAC vs Healthy	23	12	11	40-80			Histologically	no	Iia(2), Iib(4), III(6),IV(10)	no		51	22	29	39-81
#6628	PMID: 29588598	Measurement of serum PODXL concentration for detection of pancreatic cancer	Keisuke Taniuchi	ktaniuchi@kochi-u.ac.jp	Japan	Grant-in-Aid for Scientific Research (KAKENHI; 15K14396)	None Declared	Yes	prospective	serum	No details given	2007-03-01	2011-05-01	PDAC	yes	1	CA19-9	CA19-9	Single marker	No	PDAC vs Healthy	23	12	11	40-80			Histologically	no	Iia(2), Iib(4), III(6),IV(10)	no		51	22	29	39-82
#6628	PMID: 29588598	Measurement of serum PODXL concentration for detection of pancreatic cancer	Keisuke Taniuchi	ktaniuchi@kochi-u.ac.jp	Japan	Grant-in-Aid for Scientific Research (KAKENHI; 15K14396)	None Declared	Yes	prospective	serum	No details given	2007-03-01	2011-05-01	PDAC	yes	2	CA19-9	PODXL & CA19.9	Multi-marker panel	No	PDAC vs Healthy	23	12	11	40-80			Histologically	no	Iia(2), Iib(4), III(6),IV(10)	no		51	22	29	39-83
#6628	PMID: 29588598	Measurement of serum PODXL concentration for detection of pancreatic cancer	Keisuke Taniuchi	ktaniuchi@kochi-u.ac.jp	Japan	Grant-in-Aid for Scientific Research (KAKENHI; 15K14396)	None Declared	Yes	prospective	serum	No details given	2014-04-01	2016-01-01	PDAC	yes	2	CA19-9	SCGB1D2 & CA19-9	Multi-marker panel	No	PDAC vs Healthy	23	12	11	40-80			Histologically	no	Iia(2), Iib(4), III(6),IV(10)	no		51	22	29	39-84
#6628	PMID: 29588598	Measurement of serum PODXL concentration for detection of pancreatic cancer	Keisuke Taniuchi	ktaniuchi@kochi-u.ac.jp	Japan	Grant-in-Aid for Scientific Research (KAKENHI; 15K14396)	None Declared	Yes	prospective	serum	No details given	2014-04-01	2016-01-01	PDAC	yes	1	Novel	PODXL (cutoff 6.27ng/mL)	Single marker	No	PDAC vs Healthy	23	12	11	40-80			Histologically	no	Iia(2), Iib(4), III(6),IV(10)	no		51	22	29	39-80
#6628	PMID: 29588598	Measurement of serum PODXL concentration for detection of pancreatic cancer	Keisuke Taniuchi	ktaniuchi@kochi-u.ac.jp	Japan	Grant-in-Aid for Scientific Research (KAKENHI; 15K14396)	None Declared	Yes	prospective	serum	No details given	2014-04-01	2016-01-01	PDAC	yes	1	Novel	SCGB1D2 (cutoff 62.58ng/mL)	Single marker	No	PDAC vs Healthy	23	12	11	40-80			Histologically	no	Iia(2), Iib(4), III(6),IV(10)	no		51	22	29	39-81
#6628	PMID: 29588598	Measurement of serum PODXL concentration for detection of pancreatic cancer	Keisuke Taniuchi	ktaniuchi@kochi-u.ac.jp	Japan	Grant-in-Aid for Scientific Research (KAKENHI; 15K14396)	None Declared	Yes	prospective	serum	No details given	2014-04-01	2016-01-01	PDAC	yes	1	CA19-9	CA19-9	Single marker	No	PDAC vs Healthy	23	12	11	40-80			Histologically	no	Iia(2), Iib(4), III(6),IV(10)	no		51	22	29	39-82
#6628	PMID: 29588598	Measurement of serum PODXL concentration for detection of pancreatic cancer	Keisuke Taniuchi	ktaniuchi@kochi-u.ac.jp	Japan	Grant-in-Aid for Scientific Research (KAKENHI; 15K14396)	None Declared	Yes	prospective	serum	No details given	2014-04-01	2016-01-01	PDAC	yes	1	CA19-9	CA19-9	Single marker	No	PDAC vs Healthy	23	12	11	40-80			Histologically	no	Iia(2), Iib(4), III(6),IV(10)	no		51	22	29	39-82
#2137	PMID: 25106741	Macrophage inhibitory cytokine 1 (MIC-1/GDF15) as a novel diagnostic serum biomarker in pancreatic ductal adenocarcinoma	Wei Zhang	zhangww1954@126.com	Japan	Not given	None Declared	Yes	Prospective	Serum	After cyst puncture by Surgery	2014-04-01	2016-01-01	PDAC	No	1	Novel	MIC 1	Single marker	No	PDAC vs Healthy	807	438	369				Histologically	no	45127337298	No		500	287	213				Age matched volunteers
#2137	PMID: 25106741	Macrophage inhibitory cytokine 1 (MIC-1/GDF15) as a novel diagnostic serum biomarker in pancreatic ductal adenocarcinoma	Wei Zhang	zhangww1954@126.com	Japan	Not given	None Declared	Yes	Prospective	Serum	After cyst puncture by Surgery	2014-04-01	2016-01-01	PDAC	No	1	Novel	MIC 1	Single marker	No	PDAC vs Benign	807	438	369				Histologically	no	45127337298	No									115	Bening tumours	63	52		n/s
#2137	PMID: 25106741	Macrophage inhibitory cytokine 1 (MIC-1/GDF15) as a novel diagnostic serum biomarker in pancreatic ductal adenocarcinoma	Wei Zhang	zhangww1954@126.com	Japan	Not given	None Declared	Yes	Prospective	Serum	After cyst puncture by Surgery	2014-04-01	2016-01-01	PDAC	No	1	Novel	MIC 1	Single marker	No	PDAC vs Benign	807	438	369				Histologically	no	45127337298	No																	50	Chronic pancreatitis
#2137	PMID: 25106741	Macrophage inhibitory cytokine 1 (MIC-1/GDF15) as a novel diagnostic serum biomarker in pancreatic ductal adenocarcinoma	Wei Zhang	zhangww1954@126.com	Japan	Not given	None Declared	Yes	Prospective	Serum	After cyst puncture by Surgery	2014-04-01	2016-01-01	PDAC	No	1	CA19-9	CA19-9	Single marker	No	PDAC vs Healthy	807	438	369				Histologically	no	45127337298	No		500	287	213				Age matched volunteers
#2137	PMID: 25106741	Macrophage inhibitory cytokine 1 (MIC-1/GDF15) as a novel diagnostic serum biomarker in pancreatic ductal adenocarcinoma	Wei Zhang	zhangww1954@126.com	Japan	Not given	None Declared	Yes	Prospective	Serum	After cyst puncture by Surgery	2001-01-01	2010-12-01	PDAC	No	1	Novel	Ca242	Single marker	No	PDAC vs Healthy	807	438	369				Histologically	no	45127337298	No		500	287	213				Age matched volunteers
#2138	PMID: 25106741	Macrophage inhibitory cytokine 1 (MIC-1/GDF15) as a novel diagnostic serum biomarker in pancreatic ductal adenocarcinoma	Wei Zhang	zhangww1954@126.com	Japan	Not given	None Declared	Yes	Prospective	Serum	After cyst puncture by Surgery	2001-01-01	2010-12-01	PDAC	No	1	Novel	CEA	Single marker	No	PDAC vs Healthy	807	438	369				Histologically	no	45127337299	No		500	287	213				Age matched volunteers
#2139	PMID: 25106741	Macrophage inhibitory cytokine 1 (MIC-1/GDF15) as a novel diagnostic serum biomarker in pancreatic ductal adenocarcinoma	Wei Zhang	zhangww1954@126.com	Japan	Not given	None Declared	Yes	Prospective	Serum	After cyst puncture by Surgery	2001-01-01	2010-12-01	PDAC	No	2	CA19-9	MIC1 & CA19.9	Multi-marker panel	No	PDAC vs Healthy	807	438	369				Histologically	no	45127337300	No		500	287	213				Age matched volunteers
#2137	PMID: 25106741	Macrophage inhibitory cytokine 1 (MIC-1/GDF15) as a novel diagnostic serum biomarker in pancreatic ductal adenocarcinoma	Wei Zhang	zhangww1954@126.com	Japan	Not given	None Declared	Yes	Prospective	Serum	After cyst puncture by Surgery	2001-01-01	2010-12-01	PDAC	No	1	CA19-9	CA19-9	Single marker	No	PDAC vs Benign	807	438	369				Histologically	no	45127337298	No																	50	Chronic pancreatitis
#2137	PMID: 25106741	Macrophage inhibitory cytokine 1 (MIC-1/GDF15) as a novel diagnostic serum biomarker in pancreatic ductal adenocarcinoma	Wei Zhang	zhangww1954@126.com	Japan	Not given	None Declared	Yes	Prospective	Serum	After cyst puncture by Surgery	2001-01-01	2010-12-01	PDAC	No	1	Novel	CEA	Single marker	No	PDAC vs Benign	807	438	369				Histologically	no	45127337298	No																	50	Chronic pancreatitis
#2137	PMID: 25106741	Macrophage inhibitory cytokine 1 (MIC-1/GDF15) as a novel diagnostic serum biomarker in pancreatic ductal adenocarcinoma	Wei Zhang	zhangww1954@126.com	Japan	Not given	None Declared	Yes	Prospective	Serum	After cyst puncture by Surgery	2001-01-01	2010-12-01	PDAC	No	1	Novel	Ca242	Single marker	No	PDAC vs Benign	807	438	369				Histologically	no	45127337298	No																	50	Chronic pancreatitis
#2137	PMID: 25106741	Macrophage inhibitory cytokine 1 (MIC-1/GDF15) as a novel diagnostic serum biomarker in pancreatic ductal adenocarcinoma	Wei Zhang	zhangww1954@126.com	Japan	Not given	None Declared	Yes	Prospective	Serum	After cyst puncture by Surgery	2001-01-01	2010-12-01	PDAC	No	1	Novel	MIC 1	Single marker	No	PDAC vs Healthy	50								Stage 1			50
#8710		Transcriptional profiling in peripheral blood mononuclear cells of patients with pancreatic cancer identifies several genes with potential diagnostic and prognostic implications	Surinder K. Batra1	batra@unmc.edu	USA	e National Institutes of Health (RO1 CA131944, RO1 CA78590, RO1 CA 133774, EDRN UO1 CA 111294, and SPORE P50 CA127297)	None Declared	Yes	Prospective	Whole Blood	Varied	2001-01-01	2010-12-01	PC	Yes	8	Novel	8 gene predictor assay (SSBP2 & Ube2b-rs1 & CA5B & F5 & TBC1D8 & ANXA3, ARG1, and ADAMTS20.)	Multi-marker panel	no	PDAC vs Healthy	24						Histologically	No		No		20						age, gender , race matched
#7476	PMID: 23407481	Serum Osteopontin and TIMP-1 as Diagnostic and Prognostic Biomarkers for Pancreatic Adenocarcinoma	Matt Firpo	matt.firpo@hsc.utah.edu	USA	National Institutes of Health (R03CA115225, U01CA151650, R33CA155586 to SJM and P30CA042014 to the Huntsman Cancer Institute for support of core facilities), grants from the Huntsman Cancer Institute Pancreas Cancer Research Program and through support from the Huntsman Cancer Foundation. KEP was supported in part by a Ruth L. Kirschstein National Research Service Award (T35HL007744)	None Declared	Yes	Prospective	serum	No details given	2001-01-01	2010-12-01	PDAC	Yes	1	Novel	OPN	Single marker	Yes	PDAC vs Benign	86	46	40	44-87	66		Histologically or cytologically	No	Stage IA 1 Stage IB 6 Stage IIA 11 Stage IIB 24 Stage III 17 Stage IV 27 Class N0 37 Class N1 22 Class M1 27	No																	134	COMBINED COHORT
#7476	PMID: 23407481	Serum Osteopontin and TIMP-1 as Diagnostic and Prognostic Biomarkers for Pancreatic Adenocarcinoma	Matt Firpo	matt.firpo@hsc.utah.edu	USA	National Institutes of Health (R03CA115225, U01CA151650, R33CA155586 to SJM and P30CA042014 to the Huntsman Cancer Institute for support of core facilities), grants from the Huntsman Cancer Institute Pancreas Cancer Research Program and through support from the Huntsman Cancer Foundation. KEP was supported in part by a Ruth L. Kirschstein National Research Service Award (T35HL007744)	None Declared	Yes	Prospective	serum	No details given	2001-01-01	2010-12-01	PDAC	Yes	1	Novel	TIMP-1	Single marker	Yes	PDAC vs Benign	86	46	40	44-87	66		Histologically or cytologically	No	Stage IA 1 Stage IB 6 Stage IIA 11 Stage IIB 24 Stage III 17 Stage IV 27 Class N0 37 Class N1 22 Class M1 27	No																	134	COMBINED COHORT
#7476	PMID: 23407481	Serum Osteopontin and TIMP-1 as Diagnostic and Prognostic Biomarkers for Pancreatic Adenocarcinoma	Matt Firpo	matt.firpo@hsc.utah.edu	USA	National Institutes of Health (R03CA115225, U01CA151650, R33CA155586 to SJM and P30CA042014 to the Huntsman Cancer Institute for support of core facilities), grants from the Huntsman Cancer Institute Pancreas Cancer Research Program and through support from the Huntsman Cancer Foundation. KEP was supported in part by a Ruth L. Kirschstein National Research Service Award (T35HL007744)	None Declared	Yes	Prospective	serum	No details given			PDAC	Yes	1	CA19-9	CA19-9	Single marker	Yes	PDAC vs Benign	86	46	40	44-87	66		Histologically or cytologically	No	Stage IA 1 Stage IB 6 Stage IIA 11 Stage IIB 24 Stage III 17 Stage IV 27 Class N0 37 Class N1 22 Class M1 27	No																	134	COMBINED COHORT
#7476	PMID: 23407481	Serum Osteopontin and TIMP-1 as Diagnostic and Prognostic Biomarkers for Pancreatic Adenocarcinoma	Matt Firpo	matt.firpo@hsc.utah.edu	USA	National Institutes of Health (R03CA115225, U01CA151650, R33CA155586 to SJM and P30CA042014 to the Huntsman Cancer Institute for support of core facilities), grants from the Huntsman Cancer Institute Pancreas Cancer Research Program and through support from the Huntsman Cancer Foundation. KEP was supported in part by a Ruth L. Kirschstein National Research Service Award (T35HL007744)	None Declared	Yes	Prospective	serum	No details given			PDAC	Yes	1	Novel	OPN	Single marker	Yes	PDAC vs Healthy	86	46	40	44-87	66		Histologically or cytologically	No	Stage IA 1 Stage IB 6 Stage IIA 11 Stage IIB 24 Stage III 17 Stage IV 27 Class N0 37 Class N1 22 Class M1 27	No		86	46	40	34-94	63.5		Matched with attendance at outpatient
#7476	PMID: 23407481	Serum Osteopontin and TIMP-1 as Diagnostic and Prognostic Biomarkers for Pancreatic Adenocarcinoma	Matt Firpo	matt.firpo@hsc.utah.edu	USA	National Institutes of Health (R03CA115225, U01CA151650, R33CA155586 to SJM and P30CA042014 to the Huntsman Cancer Institute for support of core facilities), grants from the Huntsman Cancer Institute Pancreas Cancer Research Program and through support from the Huntsman Cancer Foundation. KEP was supported in part by a Ruth L. Kirschstein National Research Service Award (T35HL007744)	None Declared	Yes	Prospective	serum	No details given			PDAC	Yes	1	Novel	OPN	Single marker	Yes	PDAC vs Benign	86	46	40	44-87	66		Histologically or cytologically	No	Stage IA 1 Stage IB 6 Stage IIA 11 Stage IIB 24 Stage III 17 Stage IV 27 Class N0 37 Class N1 22 Class M1 27	No									48	Chronic pancreatitis	25	23	29-80	48
#7476	PMID: 23407481	Serum Osteopontin and TIMP-1 as Diagnostic and Prognostic Biomarkers for Pancreatic Adenocarcinoma	Matt Firpo	matt.firpo@hsc.utah.edu	USA	National Institutes of Health (R03CA115225, U01CA151650, R33CA155586 to SJM and P30CA042014 to the Huntsman Cancer Institute for support of core facilities), grants from the Huntsman Cancer Institute Pancreas Cancer Research Program and through support from the Huntsman Cancer Foundation. KEP was supported in part by a Ruth L. Kirschstein National Research Service Award (T35HL007744)	None Declared	Yes	Prospective	serum	No details given			PDAC	Yes	1	Novel	TIMP-1	Single marker	Yes	PDAC vs Healthy	86	46	40	44-87	66		Histologically or cytologically	No	Stage IA 1 Stage IB 6 Stage IIA 11 Stage IIB 24 Stage III 17 Stage IV 27 Class N0 37 Class N1 22 Class M1 27	No		86	46	40	34-94	63.5		Matched with attendance at outpatient
#7476	PMID: 23407481	Serum Osteopontin and TIMP-1 as Diagnostic and Prognostic Biomarkers for Pancreatic Adenocarcinoma	Matt Firpo	matt.firpo@hsc.utah.edu	USA	National Institutes of Health (R03CA115225, U01CA151650, R33CA155586 to SJM and P30CA042014 to the Huntsman Cancer Institute for support of core facilities), grants from the Huntsman Cancer Institute Pancreas Cancer Research Program and through support from the Huntsman Cancer Foundation. KEP was supported in part by a Ruth L. Kirschstein National Research Service Award (T35HL007744)	None Declared	Yes	Prospective	serum	No details given			PDAC	Yes	1	Novel	TIMP-1	Single marker	Yes	PDAC vs Benign	86	46	40	44-87	66		Histologically or cytologically	No	Stage IA 1 Stage IB 6 Stage IIA 11 Stage IIB 24 Stage III 17 Stage IV 27 Class N0 37 Class N1 22 Class M1 27	No									48	Chronic pancreatitis	25	23	29-80	48
#7476	PMID: 23407481	Serum Osteopontin and TIMP-1 as Diagnostic and Prognostic Biomarkers for Pancreatic Adenocarcinoma	Matt Firpo	matt.firpo@hsc.utah.edu	USA	National Institutes of Health (R03CA115225, U01CA151650, R33CA155586 to SJM and P30CA042014 to the Huntsman Cancer Institute for support of core facilities), grants from the Huntsman Cancer Institute Pancreas Cancer Research Program and through support from the Huntsman Cancer Foundation. KEP was supported in part by a Ruth L. Kirschstein National Research Service Award (T35HL007744)	None Declared	Yes	Prospective	serum	No details given			PDAC	Yes	1	Novel	OPN	Single marker	Yes	PDAC vs Healthy	45						Histologically or cytologically	No	Stage I/II	No		86	46	40	34-93	62.5		Matched with attendance at outpatient
#7476	PMID: 23407481	Serum Osteopontin and TIMP-1 as Diagnostic and Prognostic Biomarkers for Pancreatic Adenocarcinoma	Matt Firpo	matt.firpo@hsc.utah.edu	USA	National Institutes of Health (R03CA115225, U01CA151650, R33CA155586 to SJM and P30CA042014 to the Huntsman Cancer Institute for support of core facilities), grants from the Huntsman Cancer Institute Pancreas Cancer Research Program and through support from the Huntsman Cancer Foundation. KEP was supported in part by a Ruth L. Kirschstein National Research Service Award (T35HL007744)	None Declared	Yes	Prospective	serum	No details given			PDAC	Yes	1	Novel	TIMP-1	Single marker	Yes	PDAC vs Healthy	45						Histologically or cytologically	No	Stage I/II	No		86	46	40	34-94	63.5		Matched with attendance at outpatient
#7476	PMID: 23407481	Serum Osteopontin and TIMP-1 as Diagnostic and Prognostic Biomarkers for Pancreatic Adenocarcinoma	Matt Firpo	matt.firpo@hsc.utah.edu	USA	National Institutes of Health (R03CA115225, U01CA151650, R33CA155586 to SJM and P30CA042014 to the Huntsman Cancer Institute for support of core facilities), grants from the Huntsman Cancer Institute Pancreas Cancer Research Program and through support from the Huntsman Cancer Foundation. KEP was supported in part by a Ruth L. Kirschstein National Research Service Award (T35HL007744)	None Declared	Yes	Prospective	serum	No details given			PDAC	Yes	1	Novel	OPN	Single marker	Yes	PDAC vs Benign	45						Histologically or cytologically	No	Stage I/II	No									48	Chronic pancreatitis	25	23	29-80	48
#7476	PMID: 23407481	Serum Osteopontin and TIMP-1 as Diagnostic and Prognostic Biomarkers for Pancreatic Adenocarcinoma	Matt Firpo	matt.firpo@hsc.utah.edu	USA	National Institutes of Health (R03CA115225, U01CA151650, R33CA155586 to SJM and P30CA042014 to the Huntsman Cancer Institute for support of core facilities), grants from the Huntsman Cancer Institute Pancreas Cancer Research Program and through support from the Huntsman Cancer Foundation. KEP was supported in part by a Ruth L. Kirschstein National Research Service Award (T35HL007744)	None Declared	Yes	Prospective	serum	No details given			PDAC	Yes	1	Novel	TIMP-1	Single marker	Yes	PDAC vs Benign	45						Histologically or cytologically	No	Stage I/II	No									48	Chronic pancreatitis	25	23	29-80	48
#4228	PMID: 27692554	Optimize CA19-9 in detecting pancreatic cancer by Lewis and Secretor genotyping	Xianjun Yu	yuxianjun@fudanpci.org	China	Not given	None Declared	yes	prospective	Serum	No details given			PDAC	No	1	CA19-9	CA19-9	Single marker	No	PDAC vs Benign	578					61.3	Histologically	No	stage I, II pancreatic cancer (309, 53.4%)	No									525	Mix of healthy subjects and Benign pancreatic disorders
#4228	PMID: 27692554	Optimize CA19-9 in detecting pancreatic cancer by Lewis and Secretor genotyping	Xianjun Yu	yuxianjun@fudanpci.org	China	Not given	None Declared	yes	prospective	Serum	No details given			PDAC	No	2	CA19-9	Lewis (-) & CA19-9	Multi-marker panel	No	PDAC vs Benign	37						Histologically	No	stage I, II pancreatic cancer (309, 53.4%)	No									49	Mix of healthy subjects and Benign pancreatic disorders
#4228	PMID: 27692554	Optimize CA19-9 in detecting pancreatic cancer by Lewis and Secretor genotyping	Xianjun Yu	yuxianjun@fudanpci.org	China	Not given	None Declared	yes	prospective	Serum	No details given			PDAC	No	1	CA19-9	CA19-9	Single marker	No	PDAC vs Benign	416						Histologically	No	stage I, II pancreatic cancer (309, 53.4%)	No									379	Mix of healthy subjects and Benign pancreatic disorders
#4228	PMID: 27692554	Optimize CA19-9 in detecting pancreatic cancer by Lewis and Secretor genotyping	Xianjun Yu	yuxianjun@fudanpci.org	China	Not given	None Declared	yes	prospective	Serum	No details given			PDAC	No	1	CA19-9	CA19-9	Single marker	No	PDAC vs Benign	125						Histologically	No	stage I, II pancreatic cancer (309, 53.4%)	No									97	Mix of healthy subjects and Benign pancreatic disorders
#4228	PMID: 27692554	Optimize CA19-9 in detecting pancreatic cancer by Lewis and Secretor genotyping	Xianjun Yu	yuxianjun@fudanpci.org	China	Not given	None Declared	yes	prospective	Serum	No details given			PDAC	No	1	CA19-9	CA19-9	Single marker	No	PDAC vs Benign	541						Histologically	No	stage I, II pancreatic cancer (309, 53.4%)	No									476	Mix of healthy subjects and Benign pancreatic disorders
#4703	PMID: 27464352	The potential diagnostic value of serum microRNA signature in patients with pancreatic cancer	Julia S Johansen	julia.johansen@post3.tele.dk	Denmark	The potential diagnostic value of serum microRNA signature in patients with pancreatic cancer	Not mentioned	Yes	Prospective	Serum	No cyst puncture			PDAC	Yes	1	Novel	Let7b	Single marker	yes	PDAC vs Benign	133	86	47	31-86	63	n	Histologically	n	Stage (I/II/III/IV/not known) (4/80/10/37/2)	no																	72	HS+CP
#4703	PMID: 27464352	The potential diagnostic value of serum microRNA signature in patients with pancreatic cancer	Julia S Johansen	julia.johansen@post3.tele.dk	Denmark	The potential diagnostic value of serum microRNA signature in patients with pancreatic cancer	Not mentioned	Yes	Prospective	Serum	No cyst puncture			PDAC	Yes	1	Novel	miR-24	Single marker	yes	PDAC vs Benign	133	86	47	31-86	63	n	Histologically	n	Stage (I/II/III/IV/not known) (4/80/10/37/2)	no																	72	HS+CP
#4703	PMID: 27464352	The potential diagnostic value of serum microRNA signature in patients with pancreatic cancer	Julia S Johansen	julia.johansen@post3.tele.dk	Denmark	The potential diagnostic value of serum microRNA signature in patients with pancreatic cancer	Not mentioned	Yes	Prospective	Serum	No cyst puncture			PDAC	Yes	1	Novel	miR-25	Single marker	yes	PDAC vs Benign	133	86	47	31-86	63	n	Histologically	n	Stage (I/II/III/IV/not known) (4/80/10/37/2)	no																	72	HS+CP
#4703	PMID: 27464352	The potential diagnostic value of serum microRNA signature in patients with pancreatic cancer	Julia S Johansen	julia.johansen@post3.tele.dk	Denmark	The potential diagnostic value of serum microRNA signature in patients with pancreatic cancer	Not mentioned	Yes	Prospective	Serum	No cyst puncture			PDAC	Yes	1	Novel	miR-26a	Single marker	yes	PDAC vs Benign	133	86	47	31-86	63	n	Histologically	n	Stage (I/II/III/IV/not known) (4/80/10/37/2)	no																	72	HS+CP
#4703	PMID: 27464352	The potential diagnostic value of serum microRNA signature in patients with pancreatic cancer	Julia S Johansen	julia.johansen@post3.tele.dk	Denmark	The potential diagnostic value of serum microRNA signature in patients with pancreatic cancer	Not mentioned	Yes	Prospective	Serum	No cyst puncture	2003-08-01	2011-07-01	PDAC	Yes	1	Novel	miR-26b	Single marker	yes	PDAC vs Benign	133	86	47	31-86	63	n	Histologically	n	Stage (I/II/III/IV/not known) (4/80/10/37/2)	no																	72	HS+CP
#4703	PMID: 27464352	The potential diagnostic value of serum microRNA signature in patients with pancreatic cancer	Julia S Johansen	julia.johansen@post3.tele.dk	Denmark	The potential diagnostic value of serum microRNA signature in patients with pancreatic cancer	Not mentioned	Yes	Prospective	Serum	No cyst puncture	2003-08-01	2011-07-01	PDAC	Yes	1	Novel	miR-27a	Single marker	yes	PDAC vs Benign	133	86	47	31-86	63	n	Histologically	n	Stage (I/II/III/IV/not known) (4/80/10/37/2)	no																	72	HS+CP
#4703	PMID: 27464352	The potential diagnostic value of serum microRNA signature in patients with pancreatic cancer	Julia S Johansen	julia.johansen@post3.tele.dk	Denmark	The potential diagnostic value of serum microRNA signature in patients with pancreatic cancer	Not mentioned	Yes	Prospective	Serum	No cyst puncture	2003-08-01	2011-07-01	PDAC	Yes	1	Novel	miR-29c	Single marker	yes	PDAC vs Benign	133	86	47	31-86	63	n	Histologically	n	Stage (I/II/III/IV/not known) (4/80/10/37/2)	no																	72	HS+CP
#4703	PMID: 27464352	The potential diagnostic value of serum microRNA signature in patients with pancreatic cancer	Julia S Johansen	julia.johansen@post3.tele.dk	Denmark	The potential diagnostic value of serum microRNA signature in patients with pancreatic cancer	Not mentioned	Yes	Prospective	Serum	No cyst puncture	2003-08-01	2011-07-01	PDAC	Yes	1	Novel	miR-30a.5p	Single marker	yes	PDAC vs Benign	133	86	47	31-86	63	n	Histologically	n	Stage (I/II/III/IV/not known) (4/80/10/37/2)	no																	72	HS+CP
#4703	PMID: 27464352	The potential diagnostic value of serum microRNA signature in patients with pancreatic cancer	Julia S Johansen	julia.johansen@post3.tele.dk	Denmark	The potential diagnostic value of serum microRNA signature in patients with pancreatic cancer	Not mentioned	Yes	Prospective	Serum	No cyst puncture	2003-08-01	2011-07-01	PDAC	Yes	1	Novel	miR-106a	Single marker	yes	PDAC vs Benign	133	86	47	31-86	63	n	Histologically	n	Stage (I/II/III/IV/not known) (4/80/10/37/2)	no																	72	HS+CP
#4703	PMID: 27464352	The potential diagnostic value of serum microRNA signature in patients with pancreatic cancer	Julia S Johansen	julia.johansen@post3.tele.dk	Denmark	The potential diagnostic value of serum microRNA signature in patients with pancreatic cancer	Not mentioned	Yes	Prospective	Serum	No cyst puncture	2003-08-01	2011-07-01	PDAC	Yes	1	Novel	miR-148a	Single marker	yes	PDAC vs Benign	133	86	47	31-86	63	n	Histologically	n	Stage (I/II/III/IV/not known) (4/80/10/37/2)	no																	72	HS+CP
#4703	PMID: 27464352	The potential diagnostic value of serum microRNA signature in patients with pancreatic cancer	Julia S Johansen	julia.johansen@post3.tele.dk	Denmark	The potential diagnostic value of serum microRNA signature in patients with pancreatic cancer	Not mentioned	Yes	Prospective	Serum	No cyst puncture	2003-08-01	2011-07-01	PDAC	Yes	1	Novel	miR-185	Single marker	yes	PDAC vs Benign	133	86	47	31-86	63	n	Histologically	n	Stage (I/II/III/IV/not known) (4/80/10/37/2)	no																	72	HS+CP
#4703	PMID: 27464352	The potential diagnostic value of serum microRNA signature in patients with pancreatic cancer	Julia S Johansen	julia.johansen@post3.tele.dk	Denmark	The potential diagnostic value of serum microRNA signature in patients with pancreatic cancer	Not mentioned	Yes	Prospective	Serum	No cyst puncture	2003-08-01	2011-07-01	PDAC	Yes	1	Novel	miR-195	Single marker	yes	PDAC vs Benign	133	86	47	31-86	63	n	Histologically	n	Stage (I/II/III/IV/not known) (4/80/10/37/2)	no																	72	HS+CP
#4703	PMID: 27464352	The potential diagnostic value of serum microRNA signature in patients with pancreatic cancer	Julia S Johansen	julia.johansen@post3.tele.dk	Denmark	The potential diagnostic value of serum microRNA signature in patients with pancreatic cancer	Not mentioned	Yes	Prospective	Serum	No cyst puncture	2003-08-01	2011-07-01	PDAC	Yes	1	Novel	miR-191	Single marker	yes	PDAC vs Benign	133	86	47	31-86	63	n	Histologically	n	Stage (I/II/III/IV/not known) (4/80/10/37/2)	no																	72	HS+CP
#4703	PMID: 27464352	The potential diagnostic value of serum microRNA signature in patients with pancreatic cancer	Julia S Johansen	julia.johansen@post3.tele.dk	Denmark	The potential diagnostic value of serum microRNA signature in patients with pancreatic cancer	Not mentioned	Yes	Prospective	Serum	No cyst puncture	2003-08-01	2011-07-01	PDAC	Yes	1	Novel	miR-212	Single marker	yes	PDAC vs Benign	133	86	47	31-86	63	n	Histologically	n	Stage (I/II/III/IV/not known) (4/80/10/37/2)	no																	72	HS+CP
#4703	PMID: 27464352	The potential diagnostic value of serum microRNA signature in patients with pancreatic cancer	Julia S Johansen	julia.johansen@post3.tele.dk	Denmark	The potential diagnostic value of serum microRNA signature in patients with pancreatic cancer	Not mentioned	Yes	Prospective	Serum	No cyst puncture	2003-08-01	2011-07-01	PDAC	Yes	1	Novel	miR-320	Single marker	yes	PDAC vs Benign	133	86	47	31-86	63	n	Histologically	n	Stage (I/II/III/IV/not known) (4/80/10/37/2)	no																	72	HS+CP
#4703	PMID: 27464352	The potential diagnostic value of serum microRNA signature in patients with pancreatic cancer	Julia S Johansen	julia.johansen@post3.tele.dk	Denmark	The potential diagnostic value of serum microRNA signature in patients with pancreatic cancer	Not mentioned	Yes	Prospective	Serum	No cyst puncture	2003-08-01	2011-07-01	PDAC	Yes	1	Novel	miR-323.3p	Single marker	yes	PDAC vs Benign	133	86	47	31-86	63	n	Histologically	n	Stage (I/II/III/IV/not known) (4/80/10/37/2)	no																	72	HS+CP
#4703	PMID: 27464352	The potential diagnostic value of serum microRNA signature in patients with pancreatic cancer	Julia S Johansen	julia.johansen@post3.tele.dk	Denmark	The potential diagnostic value of serum microRNA signature in patients with pancreatic cancer	Not mentioned	Yes	Prospective	Serum	No cyst puncture	2003-08-01	2011-07-01	PDAC	Yes	1	Novel	miR-345	Single marker	yes	PDAC vs Benign	133	86	47	31-86	63	n	Histologically	n	Stage (I/II/III/IV/not known) (4/80/10/37/2)	no																	72	HS+CP
#4703	PMID: 27464352	The potential diagnostic value of serum microRNA signature in patients with pancreatic cancer	Julia S Johansen	julia.johansen@post3.tele.dk	Denmark	The potential diagnostic value of serum microRNA signature in patients with pancreatic cancer	Not mentioned	Yes	Prospective	Serum	No cyst puncture	2003-08-01	2011-07-01	PDAC	Yes	1	Novel	miR-483.5p	Single marker	yes	PDAC vs Benign	133	86	47	31-86	63	n	Histologically	n	Stage (I/II/III/IV/not known) (4/80/10/37/2)	no																	72	HS+CP
#4703	PMID: 27464352	The potential diagnostic value of serum microRNA signature in patients with pancreatic cancer	Julia S Johansen	julia.johansen@post3.tele.dk	Denmark	The potential diagnostic value of serum microRNA signature in patients with pancreatic cancer	Not mentioned	Yes	Prospective	Serum	No cyst puncture	2003-08-01	2011-07-01	PDAC	Yes	1	Novel	miR-485.3p	Single marker	yes	PDAC vs Benign	133	86	47	31-86	63	n	Histologically	n	Stage (I/II/III/IV/not known) (4/80/10/37/2)	no																	72	HS+CP
#4703	PMID: 27464352	The potential diagnostic value of serum microRNA signature in patients with pancreatic cancer	Julia S Johansen	julia.johansen@post3.tele.dk	Denmark	The potential diagnostic value of serum microRNA signature in patients with pancreatic cancer	Not mentioned	Yes	Prospective	Serum	No cyst puncture	2003-08-01	2011-07-01	PDAC	Yes	1	Novel	miR-590.5p	Single marker	yes	PDAC vs Benign	133	86	47	31-86	63	n	Histologically	n	Stage (I/II/III/IV/not known) (4/80/10/37/2)	no																	72	HS+CP
#4703	PMID: 27464352	The potential diagnostic value of serum microRNA signature in patients with pancreatic cancer	Julia S Johansen	julia.johansen@post3.tele.dk	Denmark	The potential diagnostic value of serum microRNA signature in patients with pancreatic cancer	Not mentioned	Yes	Prospective	Serum	No cyst puncture	2003-08-01	2011-07-01	PDAC	Yes	1	Novel	miR-618	Single marker	yes	PDAC vs Benign	133	86	47	31-86	63	n	Histologically	n	Stage (I/II/III/IV/not known) (4/80/10/37/2)	no																	72	HS+CP
#4703	PMID: 27464352	The potential diagnostic value of serum microRNA signature in patients with pancreatic cancer	Julia S Johansen	julia.johansen@post3.tele.dk	Denmark	The potential diagnostic value of serum microRNA signature in patients with pancreatic cancer	Not mentioned	Yes	Prospective	Serum	No cyst puncture	2003-08-01	2011-07-01	PDAC	Yes	1	Novel	miR-638	Single marker	yes	PDAC vs Benign	133	86	47	31-86	63	n	Histologically	n	Stage (I/II/III/IV/not known) (4/80/10/37/2)	no																	72	HS+CP
#4703	PMID: 27464352	The potential diagnostic value of serum microRNA signature in patients with pancreatic cancer	Julia S Johansen	julia.johansen@post3.tele.dk	Denmark	The potential diagnostic value of serum microRNA signature in patients with pancreatic cancer	Not mentioned	Yes	Prospective	Serum	No cyst puncture	2003-08-01	2011-07-01	PDAC	Yes	1	Novel	miR-645	Single marker	yes	PDAC vs Benign	133	86	47	31-86	63	n	Histologically	n	Stage (I/II/III/IV/not known) (4/80/10/37/2)	no																	72	HS+CP
#4703	PMID: 27464352	The potential diagnostic value of serum microRNA signature in patients with pancreatic cancer	Julia S Johansen	julia.johansen@post3.tele.dk	Denmark	The potential diagnostic value of serum microRNA signature in patients with pancreatic cancer	Not mentioned	Yes	Prospective	Serum	No cyst puncture	2003-08-01	2011-07-01	PDAC	Yes	1	Novel	miR-30e.3p	Single marker	yes	PDAC vs Benign	133	86	47	31-86	63	n	Histologically	n	Stage (I/II/III/IV/not known) (4/80/10/37/2)	no																	72	HS+CP
#4703	PMID: 27464352	The potential diagnostic value of serum microRNA signature in patients with pancreatic cancer	Julia S Johansen	julia.johansen@post3.tele.dk	Denmark	The potential diagnostic value of serum microRNA signature in patients with pancreatic cancer	Not mentioned	Yes	Prospective	Serum	No cyst puncture	2003-08-01	2011-07-01	PDAC	Yes	1	Novel	miR‐16 (L)	Single marker	yes	PDAC vs Benign	198	104	94	38-89	67	n	Histologically	n	Stage (I/II/III/IV/not known) (3/49/37/105/1)	no																	184	HS+CP
#4703	PMID: 27464352	The potential diagnostic value of serum microRNA signature in patients with pancreatic cancer	Julia S Johansen	julia.johansen@post3.tele.dk	Denmark	The potential diagnostic value of serum microRNA signature in patients with pancreatic cancer	Not mentioned	Yes	Prospective	Serum	No cyst puncture	2003-08-01	2011-07-01	PDAC	Yes	1	Novel	miR‐18a (L)	Single marker	yes	PDAC vs Benign	198	104	94	38-89	67	n	Histologically	n	Stage (I/II/III/IV/not known) (3/49/37/105/1)	no																	184	HS+CP
#4703	PMID: 27464352	The potential diagnostic value of serum microRNA signature in patients with pancreatic cancer	Julia S Johansen	julia.johansen@post3.tele.dk	Denmark	The potential diagnostic value of serum microRNA signature in patients with pancreatic cancer	Not mentioned	Yes	Prospective	Serum	No cyst puncture	2003-08-01	2011-07-01	PDAC	Yes	2	CA19-9	miR‐18a (L) & CA19-9	Multi-marker panel	yes	PDAC vs Benign	198	104	94	38-89	67	n	Histologically	n	Stage (I/II/III/IV/not known) (3/49/37/105/1)	no																	184	HS+CP
#4703	PMID: 27464352	The potential diagnostic value of serum microRNA signature in patients with pancreatic cancer	Julia S Johansen	julia.johansen@post3.tele.dk	Denmark	The potential diagnostic value of serum microRNA signature in patients with pancreatic cancer	Not mentioned	Yes	Prospective	Serum	No cyst puncture	2003-08-01	2011-07-01	PDAC	Yes	1	Novel	miR‐20a (L)	Single marker	yes	PDAC vs Benign	198	104	94	38-89	67	n	Histologically	n	Stage (I/II/III/IV/not known) (3/49/37/105/1)	no																	184	HS+CP
#4703	PMID: 27464352	The potential diagnostic value of serum microRNA signature in patients with pancreatic cancer	Julia S Johansen	julia.johansen@post3.tele.dk	Denmark	The potential diagnostic value of serum microRNA signature in patients with pancreatic cancer	Not mentioned	Yes	Prospective	Serum	No cyst puncture	2003-08-01	2011-07-01	PDAC	Yes	1	Novel	miR‐24	Single marker	yes	PDAC vs Benign	198	104	94	38-89	67	n	Histologically	n	Stage (I/II/III/IV/not known) (3/49/37/105/1)	no																	184	HS+CP
#4703	PMID: 27464352	The potential diagnostic value of serum microRNA signature in patients with pancreatic cancer	Julia S Johansen	julia.johansen@post3.tele.dk	Denmark	The potential diagnostic value of serum microRNA signature in patients with pancreatic cancer	Not mentioned	Yes	Prospective	Serum	No cyst puncture	2003-08-01	2011-07-01	PDAC	Yes	1	Novel	miR‐25	Single marker	yes	PDAC vs Benign	198	104	94	38-89	67	n	Histologically	n	Stage (I/II/III/IV/not known) (3/49/37/105/1)	no																	184	HS+CP
#4703	PMID: 27464352	The potential diagnostic value of serum microRNA signature in patients with pancreatic cancer	Julia S Johansen	julia.johansen@post3.tele.dk	Denmark	The potential diagnostic value of serum microRNA signature in patients with pancreatic cancer	Not mentioned	Yes	Prospective	Serum	No cyst puncture	2003-08-01	2011-07-01	PDAC	Yes	1	Novel	miR‐26a	Single marker	yes	PDAC vs Benign	198	104	94	38-89	67	n	Histologically	n	Stage (I/II/III/IV/not known) (3/49/37/105/1)	no																	184	HS+CP
#4703	PMID: 27464352	The potential diagnostic value of serum microRNA signature in patients with pancreatic cancer	Julia S Johansen	julia.johansen@post3.tele.dk	Denmark	The potential diagnostic value of serum microRNA signature in patients with pancreatic cancer	Not mentioned	Yes	Prospective	Serum	No cyst puncture	2003-08-01	2011-07-01	PDAC	Yes	1	Novel	miR‐26b	Single marker	yes	PDAC vs Benign	198	104	94	38-89	67	n	Histologically	n	Stage (I/II/III/IV/not known) (3/49/37/105/1)	no																	184	HS+CP
#4703	PMID: 27464352	The potential diagnostic value of serum microRNA signature in patients with pancreatic cancer	Julia S Johansen	julia.johansen@post3.tele.dk	Denmark	The potential diagnostic value of serum microRNA signature in patients with pancreatic cancer	Not mentioned	Yes	Prospective	Serum	No cyst puncture	2003-08-01	2011-07-01	PDAC	Yes	1	Novel	miR‐27a	Single marker	yes	PDAC vs Benign	198	104	94	38-89	67	n	Histologically	n	Stage (I/II/III/IV/not known) (3/49/37/105/1)	no																	184	HS+CP
#4703	PMID: 27464352	The potential diagnostic value of serum microRNA signature in patients with pancreatic cancer	Julia S Johansen	julia.johansen@post3.tele.dk	Denmark	The potential diagnostic value of serum microRNA signature in patients with pancreatic cancer	Not mentioned	Yes	Prospective	Serum	No cyst puncture	2003-08-01	2011-07-01	PDAC	Yes	1	Novel	miR‐29c	Single marker	yes	PDAC vs Benign	198	104	94	38-89	67	n	Histologically	n	Stage (I/II/III/IV/not known) (3/49/37/105/1)	no																	184	HS+CP
#4703	PMID: 27464352	The potential diagnostic value of serum microRNA signature in patients with pancreatic cancer	Julia S Johansen	julia.johansen@post3.tele.dk	Denmark	The potential diagnostic value of serum microRNA signature in patients with pancreatic cancer	Not mentioned	Yes	Prospective	Serum	No cyst puncture	2003-08-01	2011-07-01	PDAC	Yes	1	Novel	miR‐30a.5p	Single marker	yes	PDAC vs Benign	198	104	94	38-89	67	n	Histologically	n	Stage (I/II/III/IV/not known) (3/49/37/105/1)	no																	184	HS+CP
#4703	PMID: 27464352	The potential diagnostic value of serum microRNA signature in patients with pancreatic cancer	Julia S Johansen	julia.johansen@post3.tele.dk	Denmark	The potential diagnostic value of serum microRNA signature in patients with pancreatic cancer	Not mentioned	Yes	Prospective	Serum	No cyst puncture	2003-08-01	2011-07-01	PDAC	Yes	1	Novel	miR‐30e.3p	Single marker	yes	PDAC vs Benign	198	104	94	38-89	67	n	Histologically	n	Stage (I/II/III/IV/not known) (3/49/37/105/1)	no																	184	HS+CP
#4703	PMID: 27464352	The potential diagnostic value of serum microRNA signature in patients with pancreatic cancer	Julia S Johansen	julia.johansen@post3.tele.dk	Denmark	The potential diagnostic value of serum microRNA signature in patients with pancreatic cancer	Not mentioned	Yes	Prospective	Serum	No cyst puncture	2003-08-01	2011-07-01	PDAC	Yes	1	Novel	miR‐99a (L)	Single marker	yes	PDAC vs Benign	198	104	94	38-89	67	n	Histologically	n	Stage (I/II/III/IV/not known) (3/49/37/105/1)	no																	184	HS+CP
#4703	PMID: 27464352	The potential diagnostic value of serum microRNA signature in patients with pancreatic cancer	Julia S Johansen	julia.johansen@post3.tele.dk	Denmark	The potential diagnostic value of serum microRNA signature in patients with pancreatic cancer	Not mentioned	Yes	Prospective	Serum	No cyst puncture	2003-08-01	2011-07-01	PDAC	Yes	1	Novel	miR‐106a	Single marker	yes	PDAC vs Benign	198	104	94	38-89	67	n	Histologically	n	Stage (I/II/III/IV/not known) (3/49/37/105/1)	no																	184	HS+CP
#4703	PMID: 27464352	The potential diagnostic value of serum microRNA signature in patients with pancreatic cancer	Julia S Johansen	julia.johansen@post3.tele.dk	Denmark	The potential diagnostic value of serum microRNA signature in patients with pancreatic cancer	Not mentioned	Yes	Prospective	Serum	No cyst puncture	2003-08-01	2011-07-01	PDAC	Yes	2	CA19-9	miR‐106a & CA19-9	Multi-marker panel	yes	PDAC vs Benign	198	104	94	38-89	67	n	Histologically	n	Stage (I/II/III/IV/not known) (3/49/37/105/1)	no																	184	HS+CP
#4703	PMID: 27464352	The potential diagnostic value of serum microRNA signature in patients with pancreatic cancer	Julia S Johansen	julia.johansen@post3.tele.dk	Denmark	The potential diagnostic value of serum microRNA signature in patients with pancreatic cancer	Not mentioned	Yes	Prospective	Serum	No cyst puncture	2003-08-01	2011-07-01	PDAC	Yes	1	Novel	miR‐181a (L)	Single marker	yes	PDAC vs Benign	198	104	94	38-89	67	n	Histologically	n	Stage (I/II/III/IV/not known) (3/49/37/105/1)	no																	184	HS+CP
#4703	PMID: 27464352	The potential diagnostic value of serum microRNA signature in patients with pancreatic cancer	Julia S Johansen	julia.johansen@post3.tele.dk	Denmark	The potential diagnostic value of serum microRNA signature in patients with pancreatic cancer	Not mentioned	Yes	Prospective	Serum	No cyst puncture	2003-08-01	2011-07-01	PDAC	Yes	2	CA19-9	miR‐181a (L) & CA19-9	Multi-marker panel	yes	PDAC vs Benign	198	104	94	38-89	67	n	Histologically	n	Stage (I/II/III/IV/not known) (3/49/37/105/1)	no																	184	HS+CP
#4703	PMID: 27464352	The potential diagnostic value of serum microRNA signature in patients with pancreatic cancer	Julia S Johansen	julia.johansen@post3.tele.dk	Denmark	The potential diagnostic value of serum microRNA signature in patients with pancreatic cancer	Not mentioned	Yes	Prospective	Serum	No cyst puncture	2003-08-01	2011-07-01	PDAC	Yes	1	Novel	miR‐185	Single marker	yes	PDAC vs Benign	198	104	94	38-89	67	n	Histologically	n	Stage (I/II/III/IV/not known) (3/49/37/105/1)	no																	184	HS+CP
#4703	PMID: 27464352	The potential diagnostic value of serum microRNA signature in patients with pancreatic cancer	Julia S Johansen	julia.johansen@post3.tele.dk	Denmark	The potential diagnostic value of serum microRNA signature in patients with pancreatic cancer	Not mentioned	Yes	Prospective	Serum	No cyst puncture	2003-08-01	2011-07-01	PDAC	Yes	1	Novel	miR‐191	Single marker	yes	PDAC vs Benign	198	104	94	38-89	67	n	Histologically	n	Stage (I/II/III/IV/not known) (3/49/37/105/1)	no																	184	HS+CP
#4703	PMID: 27464352	The potential diagnostic value of serum microRNA signature in patients with pancreatic cancer	Julia S Johansen	julia.johansen@post3.tele.dk	Denmark	The potential diagnostic value of serum microRNA signature in patients with pancreatic cancer	Not mentioned	Yes	Prospective	Serum	No cyst puncture	2003-08-01	2011-07-01	PDAC	Yes	1	Novel	miR‐323.3p	Single marker	yes	PDAC vs Benign	198	104	94	38-89	67	n	Histologically	n	Stage (I/II/III/IV/not known) (3/49/37/105/1)	no																	184	HS+CP
#4703	PMID: 27464352	The potential diagnostic value of serum microRNA signature in patients with pancreatic cancer	Julia S Johansen	julia.johansen@post3.tele.dk	Denmark	The potential diagnostic value of serum microRNA signature in patients with pancreatic cancer	Not mentioned	Yes	Prospective	Serum	No cyst puncture	2003-08-01	2011-07-01	PDAC	Yes	1	Novel	miR‐345	Single marker	yes	PDAC vs Benign	198	104	94	38-89	67	n	Histologically	n	Stage (I/II/III/IV/not known) (3/49/37/105/1)	no																	184	HS+CP
#4703	PMID: 27464352	The potential diagnostic value of serum microRNA signature in patients with pancreatic cancer	Julia S Johansen	julia.johansen@post3.tele.dk	Denmark	The potential diagnostic value of serum microRNA signature in patients with pancreatic cancer	Not mentioned	Yes	Prospective	Serum	No cyst puncture	2003-08-01	2011-07-01	PDAC	Yes	1	Novel	miR‐483.5p	Single marker	yes	PDAC vs Benign	198	104	94	38-89	67	n	Histologically	n	Stage (I/II/III/IV/not known) (3/49/37/105/1)	no																	184	HS+CP
#4703	PMID: 27464352	The potential diagnostic value of serum microRNA signature in patients with pancreatic cancer	Julia S Johansen	julia.johansen@post3.tele.dk	Denmark	The potential diagnostic value of serum microRNA signature in patients with pancreatic cancer	Not mentioned	Yes	Prospective	Serum	No cyst puncture	2003-08-01	2011-07-01	PDAC	Yes	2	CA19-9	miR‐483.5p & CA19-9	Multi-marker panel	yes	PDAC vs Benign	198	104	94	38-89	67	n	Histologically	n	Stage (I/II/III/IV/not known) (3/49/37/105/1)	no																	184	HS+CP
#4703	PMID: 27464352	The potential diagnostic value of serum microRNA signature in patients with pancreatic cancer	Julia S Johansen	julia.johansen@post3.tele.dk	Denmark	The potential diagnostic value of serum microRNA signature in patients with pancreatic cancer	Not mentioned	Yes	Prospective	Serum	No cyst puncture	2003-08-01	2011-07-01	PDAC	Yes	1	Novel	miR‐485.3p	Single marker	yes	PDAC vs Benign	198	104	94	38-89	67	n	Histologically	n	Stage (I/II/III/IV/not known) (3/49/37/105/1)	no																	184	HS+CP
#4703	PMID: 27464352	The potential diagnostic value of serum microRNA signature in patients with pancreatic cancer	Julia S Johansen	julia.johansen@post3.tele.dk	Denmark	The potential diagnostic value of serum microRNA signature in patients with pancreatic cancer	Not mentioned	Yes	Prospective	Serum	No cyst puncture	2003-08-01	2011-07-01	PDAC	Yes	1	Novel	miR‐590.5p	Single marker	yes	PDAC vs Benign	198	104	94	38-89	67	n	Histologically	n	Stage (I/II/III/IV/not known) (3/49/37/105/1)	no																	184	HS+CP
#4703	PMID: 27464352	The potential diagnostic value of serum microRNA signature in patients with pancreatic cancer	Julia S Johansen	julia.johansen@post3.tele.dk	Denmark	The potential diagnostic value of serum microRNA signature in patients with pancreatic cancer	Not mentioned	Yes	Prospective	Serum	No cyst puncture	2003-08-01	2011-07-01	PDAC	Yes	1	Novel	miR‐618	Single marker	yes	PDAC vs Benign	198	104	94	38-89	67	n	Histologically	n	Stage (I/II/III/IV/not known) (3/49/37/105/1)	no																	184	HS+CP
#4703	PMID: 27464352	The potential diagnostic value of serum microRNA signature in patients with pancreatic cancer	Julia S Johansen	julia.johansen@post3.tele.dk	Denmark	The potential diagnostic value of serum microRNA signature in patients with pancreatic cancer	Not mentioned	Yes	Prospective	Serum	No cyst puncture	2003-08-01	2011-07-01	PDAC	Yes	1	Novel	miR‐345	Single marker	yes	PDAC vs Benign	86	49	37	46-86	67	no	Histologically	n	Stage (I/II/III/IV/not known) (1/13/22/49/0)	no																	51	HS+CP
#4703	PMID: 27464352	The potential diagnostic value of serum microRNA signature in patients with pancreatic cancer	Julia S Johansen	julia.johansen@post3.tele.dk	Denmark	The potential diagnostic value of serum microRNA signature in patients with pancreatic cancer	Not mentioned	Yes	Prospective	Serum	No cyst puncture	2003-08-01	2011-07-01	PDAC	Yes	1	Novel	miR‐483.5p	Single marker	yes	PDAC vs Benign	86	49	37	46-86	67	no	Histologically	n	Stage (I/II/III/IV/not known) (1/13/22/49/0)	no																	51	HS+CP
#4703	PMID: 27464352	The potential diagnostic value of serum microRNA signature in patients with pancreatic cancer	Julia S Johansen	julia.johansen@post3.tele.dk	Denmark	The potential diagnostic value of serum microRNA signature in patients with pancreatic cancer	Not mentioned	Yes	Prospective	Serum	No cyst puncture	2003-08-01	2011-07-01	PDAC	Yes	2	CA19-9	miR‐483.5p & CA19-9	Multi-marker panel	yes	PDAC vs Benign	86	49	37	46-86	67	no	Histologically	n	Stage (I/II/III/IV/not known) (1/13/22/49/0)	no																	51	HS+CP
#4703	PMID: 27464352	The potential diagnostic value of serum microRNA signature in patients with pancreatic cancer	Julia S Johansen	julia.johansen@post3.tele.dk	Denmark	The potential diagnostic value of serum microRNA signature in patients with pancreatic cancer	Not mentioned	Yes	Prospective	Serum	No cyst puncture	2003-08-01	2011-07-01	PDAC	Yes	2	CA19-9	miR‐16 (L) & CA19-9	Multi-marker panel	yes	PDAC vs Healthy	198	104	94	38-89	67	n	Histologically	n	Stage (I/II/III/IV/not known) (3/49/37/105/1)	no		153	63	90	18-69	42	na	volunteer
#4703	PMID: 27464352	The potential diagnostic value of serum microRNA signature in patients with pancreatic cancer	Julia S Johansen	julia.johansen@post3.tele.dk	Denmark	The potential diagnostic value of serum microRNA signature in patients with pancreatic cancer	Not mentioned	Yes	Prospective	Serum	No cyst puncture	2003-08-01	2011-07-01	PDAC	Yes	2	CA19-9	miR‐27a & CA19-9	Multi-marker panel	yes	PDAC vs Healthy	198	104	94	38-89	67	n	Histologically	n	Stage (I/II/III/IV/not known) (3/49/37/105/1)	no		153	63	90	18-69	42	na	volunteer
#4703	PMID: 27464352	The potential diagnostic value of serum microRNA signature in patients with pancreatic cancer	Julia S Johansen	julia.johansen@post3.tele.dk	Denmark	The potential diagnostic value of serum microRNA signature in patients with pancreatic cancer	Not mentioned	Yes	Prospective	Serum	No cyst puncture	2003-08-01	2011-07-01	PDAC	Yes	2	CA19-9	miR‐185 & CA19-9	Multi-marker panel	yes	PDAC vs Healthy	198	104	94	38-89	67	n	Histologically	n	Stage (I/II/III/IV/not known) (3/49/37/105/1)	no		153	63	90	18-69	42	na	volunteer
#4703	PMID: 27464352	The potential diagnostic value of serum microRNA signature in patients with pancreatic cancer	Julia S Johansen	julia.johansen@post3.tele.dk	Denmark	The potential diagnostic value of serum microRNA signature in patients with pancreatic cancer	Not mentioned	Yes	Prospective	Serum	No cyst puncture	2003-08-01	2011-07-01	PDAC	Yes	2	CA19-9	miR‐323.3p & CA19-9	Multi-marker panel	yes	PDAC vs Healthy	198	104	94	38-89	67	n	Histologically	n	Stage (I/II/III/IV/not known) (3/49/37/105/1)	no		153	63	90	18-69	42	na	volunteer
#4703	PMID: 27464352	The potential diagnostic value of serum microRNA signature in patients with pancreatic cancer	Julia S Johansen	julia.johansen@post3.tele.dk	Denmark	The potential diagnostic value of serum microRNA signature in patients with pancreatic cancer	Not mentioned	Yes	Prospective	Serum	No cyst puncture	2003-08-01	2011-07-01	PDAC	Yes	2	CA19-9	miR‐590.5p & CA19-9	Multi-marker panel	yes	PDAC vs Healthy	198	104	94	38-89	67	n	Histologically	n	Stage (I/II/III/IV/not known) (3/49/37/105/1)	no		153	63	90	18-69	42	na	volunteer
#4703	PMID: 27464352	The potential diagnostic value of serum microRNA signature in patients with pancreatic cancer	Julia S Johansen	julia.johansen@post3.tele.dk	Denmark	The potential diagnostic value of serum microRNA signature in patients with pancreatic cancer	Not mentioned	Yes	Prospective	Serum	No cyst puncture	2003-08-01	2011-07-01	PDAC	Yes	2	CA19-9	miR‐106a & CA19-9	Multi-marker panel	yes	PDAC vs Healthy	198	104	94	38-89	67	n	Histologically	n	Stage (I/II/III/IV/not known) (3/49/37/105/1)	no		153	63	90	18-69	42	na	volunteer
#4703	PMID: 27464352	The potential diagnostic value of serum microRNA signature in patients with pancreatic cancer	Julia S Johansen	julia.johansen@post3.tele.dk	Denmark	The potential diagnostic value of serum microRNA signature in patients with pancreatic cancer	Not mentioned	Yes	Prospective	Serum	No cyst puncture	2003-08-01	2011-07-01	PDAC	Yes	2	CA19-9	miR‐26a & CA19-9	Multi-marker panel	yes	PDAC vs Healthy	198	104	94	38-89	67	n	Histologically	n	Stage (I/II/III/IV/not known) (3/49/37/105/1)	no		153	63	90	18-69	42	na	volunteer
#4703	PMID: 27464352	The potential diagnostic value of serum microRNA signature in patients with pancreatic cancer	Julia S Johansen	julia.johansen@post3.tele.dk	Denmark	The potential diagnostic value of serum microRNA signature in patients with pancreatic cancer	Not mentioned	Yes	Prospective	Serum	No cyst puncture	2003-08-01	2011-07-01	PDAC	Yes	2	CA19-9	miR‐26b & CA19-9	Multi-marker panel	yes	PDAC vs Healthy	198	104	94	38-89	67	n	Histologically	n	Stage (I/II/III/IV/not known) (3/49/37/105/1)	no		153	63	90	18-69	42	na	volunteer
#4703	PMID: 27464352	The potential diagnostic value of serum microRNA signature in patients with pancreatic cancer	Julia S Johansen	julia.johansen@post3.tele.dk	Denmark	The potential diagnostic value of serum microRNA signature in patients with pancreatic cancer	Not mentioned	Yes	Prospective	Serum	No cyst puncture	2003-08-01	2011-07-01	PDAC	Yes	2	CA19-9	miR‐192 & CA19-9	Multi-marker panel	yes	PDAC vs Healthy	198	104	94	38-89	67	n	Histologically	n	Stage (I/II/III/IV/not known) (3/49/37/105/1)	no		153	63	90	18-69	42	na	volunteer
#4703	PMID: 27464352	The potential diagnostic value of serum microRNA signature in patients with pancreatic cancer	Julia S Johansen	julia.johansen@post3.tele.dk	Denmark	The potential diagnostic value of serum microRNA signature in patients with pancreatic cancer	Not mentioned	Yes	Prospective	Serum	No cyst puncture	2003-08-01	2011-07-01	PDAC	Yes	2	CA19-9	miR‐30e.3p & CA19-9	Multi-marker panel	yes	PDAC vs Healthy	198	104	94	38-89	67	n	Histologically	n	Stage (I/II/III/IV/not known) (3/49/37/105/1)	no		153	63	90	18-69	42	na	volunteer
#4703	PMID: 27464352	The potential diagnostic value of serum microRNA signature in patients with pancreatic cancer	Julia S Johansen	julia.johansen@post3.tele.dk	Denmark	The potential diagnostic value of serum microRNA signature in patients with pancreatic cancer	Not mentioned	Yes	Prospective	Serum	No cyst puncture	2003-08-01	2011-07-01	PDAC	Yes	2	CA19-9	miR‐24 & CA19-9	Multi-marker panel	yes	PDAC vs Healthy	198	104	94	38-89	67	n	Histologically	n	Stage (I/II/III/IV/not known) (3/49/37/105/1)	no		153	63	90	18-69	42	na	volunteer
#4703	PMID: 27464352	The potential diagnostic value of serum microRNA signature in patients with pancreatic cancer	Julia S Johansen	julia.johansen@post3.tele.dk	Denmark	The potential diagnostic value of serum microRNA signature in patients with pancreatic cancer	Not mentioned	Yes	Prospective	Serum	No cyst puncture	2003-08-01	2011-07-01	PDAC	Yes	2	CA19-9	miR‐18a (L) & CA19-9	Multi-marker panel	yes	PDAC vs Healthy	198	104	94	38-89	67	n	Histologically	n	Stage (I/II/III/IV/not known) (3/49/37/105/1)	no		153	63	90	18-69	42	na	volunteer
#4703	PMID: 27464352	The potential diagnostic value of serum microRNA signature in patients with pancreatic cancer	Julia S Johansen	julia.johansen@post3.tele.dk	Denmark	The potential diagnostic value of serum microRNA signature in patients with pancreatic cancer	Not mentioned	Yes	Prospective	Serum	No cyst puncture	2003-08-01	2011-07-01	PDAC	Yes	2	CA19-9	miR‐483.5p & CA19-9	Multi-marker panel	yes	PDAC vs Healthy	198	104	94	38-89	67	n	Histologically	n	Stage (I/II/III/IV/not known) (3/49/37/105/1)	no		153	63	90	18-69	42	na	volunteer
#4703	PMID: 27464352	The potential diagnostic value of serum microRNA signature in patients with pancreatic cancer	Julia S Johansen	julia.johansen@post3.tele.dk	Denmark	The potential diagnostic value of serum microRNA signature in patients with pancreatic cancer	Not mentioned	Yes	Prospective	Serum	No cyst puncture	2003-08-01	2011-07-01	PDAC	Yes	1	Novel	miR‐16 (L)	Single marker	yes	PDAC vs Healthy	198	104	94	38-89	67	n	Histologically	n	Stage (I/II/III/IV/not known) (3/49/37/105/1)	no		153	63	90	18-69	42	na	volunteer
#4703	PMID: 27464352	The potential diagnostic value of serum microRNA signature in patients with pancreatic cancer	Julia S Johansen	julia.johansen@post3.tele.dk	Denmark	The potential diagnostic value of serum microRNA signature in patients with pancreatic cancer	Not mentioned	Yes	Prospective	Serum	No cyst puncture	2003-08-01	2011-07-01	PDAC	Yes	1	Novel	miR‐27a	Single marker	yes	PDAC vs Healthy	198	104	94	38-89	67	n	Histologically	n	Stage (I/II/III/IV/not known) (3/49/37/105/1)	no		153	63	90	18-69	42	na	volunteer
#4703	PMID: 27464352	The potential diagnostic value of serum microRNA signature in patients with pancreatic cancer	Julia S Johansen	julia.johansen@post3.tele.dk	Denmark	The potential diagnostic value of serum microRNA signature in patients with pancreatic cancer	Not mentioned	Yes	Prospective	Serum	No cyst puncture	2003-08-01	2011-07-01	PDAC	Yes	1	Novel	miR‐185	Single marker	yes	PDAC vs Healthy	198	104	94	38-89	67	n	Histologically	n	Stage (I/II/III/IV/not known) (3/49/37/105/1)	no		153	63	90	18-69	42	na	volunteer
#4703	PMID: 27464352	The potential diagnostic value of serum microRNA signature in patients with pancreatic cancer	Julia S Johansen	julia.johansen@post3.tele.dk	Denmark	The potential diagnostic value of serum microRNA signature in patients with pancreatic cancer	Not mentioned	Yes	Prospective	Serum	No cyst puncture	2003-08-01	2011-07-01	PDAC	Yes	1	Novel	miR‐323.3p	Single marker	yes	PDAC vs Healthy	198	104	94	38-89	67	n	Histologically	n	Stage (I/II/III/IV/not known) (3/49/37/105/1)	no		153	63	90	18-69	42	na	volunteer
#4703	PMID: 27464352	The potential diagnostic value of serum microRNA signature in patients with pancreatic cancer	Julia S Johansen	julia.johansen@post3.tele.dk	Denmark	The potential diagnostic value of serum microRNA signature in patients with pancreatic cancer	Not mentioned	Yes	Prospective	Serum	No cyst puncture	2003-08-01	2011-07-01	PDAC	Yes	1	Novel	miR‐590.5p	Single marker	yes	PDAC vs Healthy	198	104	94	38-89	67	n	Histologically	n	Stage (I/II/III/IV/not known) (3/49/37/105/1)	no		153	63	90	18-69	42	na	volunteer
#4703	PMID: 27464352	The potential diagnostic value of serum microRNA signature in patients with pancreatic cancer	Julia S Johansen	julia.johansen@post3.tele.dk	Denmark	The potential diagnostic value of serum microRNA signature in patients with pancreatic cancer	Not mentioned	Yes	Prospective	Serum	No cyst puncture	2003-08-01	2011-07-01	PDAC	Yes	1	Novel	miR‐106a	Single marker	yes	PDAC vs Healthy	198	104	94	38-89	67	n	Histologically	n	Stage (I/II/III/IV/not known) (3/49/37/105/1)	no		153	63	90	18-69	42	na	volunteer
#4703	PMID: 27464352	The potential diagnostic value of serum microRNA signature in patients with pancreatic cancer	Julia S Johansen	julia.johansen@post3.tele.dk	Denmark	The potential diagnostic value of serum microRNA signature in patients with pancreatic cancer	Not mentioned	Yes	Prospective	Serum	No cyst puncture	2003-08-01	2011-07-01	PDAC	Yes	1	Novel	miR‐26a	Single marker	yes	PDAC vs Healthy	198	104	94	38-89	67	n	Histologically	n	Stage (I/II/III/IV/not known) (3/49/37/105/1)	no		153	63	90	18-69	42	na	volunteer
#4703	PMID: 27464352	The potential diagnostic value of serum microRNA signature in patients with pancreatic cancer	Julia S Johansen	julia.johansen@post3.tele.dk	Denmark	The potential diagnostic value of serum microRNA signature in patients with pancreatic cancer	Not mentioned	Yes	Prospective	Serum	No cyst puncture	2003-08-01	2011-07-01	PDAC	Yes	1	Novel	miR‐26b	Single marker	yes	PDAC vs Healthy	198	104	94	38-89	67	n	Histologically	n	Stage (I/II/III/IV/not known) (3/49/37/105/1)	no		153	63	90	18-69	42	na	volunteer
#4703	PMID: 27464352	The potential diagnostic value of serum microRNA signature in patients with pancreatic cancer	Julia S Johansen	julia.johansen@post3.tele.dk	Denmark	The potential diagnostic value of serum microRNA signature in patients with pancreatic cancer	Not mentioned	Yes	Prospective	Serum	No cyst puncture	2003-08-01	2011-07-01	PDAC	Yes	1	Novel	miR‐191	Single marker	yes	PDAC vs Healthy	198	104	94	38-89	67	n	Histologically	n	Stage (I/II/III/IV/not known) (3/49/37/105/1)	no		153	63	90	18-69	42	na	volunteer
#4703	PMID: 27464352	The potential diagnostic value of serum microRNA signature in patients with pancreatic cancer	Julia S Johansen	julia.johansen@post3.tele.dk	Denmark	The potential diagnostic value of serum microRNA signature in patients with pancreatic cancer	Not mentioned	Yes	Prospective	Serum	No cyst puncture	2003-08-01	2011-07-01	PDAC	Yes	1	Novel	miR‐30e.3p	Single marker	yes	PDAC vs Healthy	198	104	94	38-89	67	n	Histologically	n	Stage (I/II/III/IV/not known) (3/49/37/105/1)	no		153	63	90	18-69	42	na	volunteer
#4703	PMID: 27464352	The potential diagnostic value of serum microRNA signature in patients with pancreatic cancer	Julia S Johansen	julia.johansen@post3.tele.dk	Denmark	The potential diagnostic value of serum microRNA signature in patients with pancreatic cancer	Not mentioned	Yes	Prospective	Serum	No cyst puncture	2003-08-01	2011-07-01	PDAC	Yes	1	Novel	miR‐24	Single marker	yes	PDAC vs Healthy	198	104	94	38-89	67	n	Histologically	n	Stage (I/II/III/IV/not known) (3/49/37/105/1)	no		153	63	90	18-69	42	na	volunteer
#4703	PMID: 27464352	The potential diagnostic value of serum microRNA signature in patients with pancreatic cancer	Julia S Johansen	julia.johansen@post3.tele.dk	Denmark	The potential diagnostic value of serum microRNA signature in patients with pancreatic cancer	Not mentioned	Yes	Prospective	Serum	No cyst puncture	2003-08-01	2011-07-01	PDAC	Yes	1	Novel	miR‐20a (L)	Single marker	yes	PDAC vs Healthy	198	104	94	38-89	67	n	Histologically	n	Stage (I/II/III/IV/not known) (3/49/37/105/1)	no		153	63	90	18-69	42	na	volunteer
#4703	PMID: 27464352	The potential diagnostic value of serum microRNA signature in patients with pancreatic cancer	Julia S Johansen	julia.johansen@post3.tele.dk	Denmark	The potential diagnostic value of serum microRNA signature in patients with pancreatic cancer	Not mentioned	Yes	Prospective	Serum	No cyst puncture	2003-08-01	2011-07-01	PDAC	Yes	1	Novel	miR‐181a (L)	Single marker	yes	PDAC vs Healthy	198	104	94	38-89	67	n	Histologically	n	Stage (I/II/III/IV/not known) (3/49/37/105/1)	no		153	63	90	18-69	42	na	volunteer
#4703	PMID: 27464352	The potential diagnostic value of serum microRNA signature in patients with pancreatic cancer	Julia S Johansen	julia.johansen@post3.tele.dk	Denmark	The potential diagnostic value of serum microRNA signature in patients with pancreatic cancer	Not mentioned	Yes	Prospective	Serum	No cyst puncture	2003-08-01	2011-07-01	PDAC	Yes	1	Novel	miR‐99a (L)	Single marker	yes	PDAC vs Healthy	198	104	94	38-89	67	n	Histologically	n	Stage (I/II/III/IV/not known) (3/49/37/105/1)	no		153	63	90	18-69	42	na	volunteer
#4703	PMID: 27464352	The potential diagnostic value of serum microRNA signature in patients with pancreatic cancer	Julia S Johansen	julia.johansen@post3.tele.dk	Denmark	The potential diagnostic value of serum microRNA signature in patients with pancreatic cancer	Not mentioned	Yes	Prospective	Serum	No cyst puncture	2003-08-01	2011-07-01	PDAC	Yes	1	Novel	miR‐30a.5p	Single marker	yes	PDAC vs Healthy	198	104	94	38-89	67	n	Histologically	n	Stage (I/II/III/IV/not known) (3/49/37/105/1)	no		153	63	90	18-69	42	na	volunteer
#4703	PMID: 27464352	The potential diagnostic value of serum microRNA signature in patients with pancreatic cancer	Julia S Johansen	julia.johansen@post3.tele.dk	Denmark	The potential diagnostic value of serum microRNA signature in patients with pancreatic cancer	Not mentioned	Yes	Prospective	Serum	No cyst puncture	2003-08-01	2011-07-01	PDAC	Yes	1	Novel	miR‐25	Single marker	yes	PDAC vs Healthy	198	104	94	38-89	67	n	Histologically	n	Stage (I/II/III/IV/not known) (3/49/37/105/1)	no		153	63	90	18-69	42	na	volunteer
#4703	PMID: 27464352	The potential diagnostic value of serum microRNA signature in patients with pancreatic cancer	Julia S Johansen	julia.johansen@post3.tele.dk	Denmark	The potential diagnostic value of serum microRNA signature in patients with pancreatic cancer	Not mentioned	Yes	Prospective	Serum	No cyst puncture	2003-08-01	2011-07-01	PDAC	Yes	1	Novel	miR‐345	Single marker	yes	PDAC vs Healthy	198	104	94	38-89	67	n	Histologically	n	Stage (I/II/III/IV/not known) (3/49/37/105/1)	no		153	63	90	18-69	42	na	volunteer
#4703	PMID: 27464352	The potential diagnostic value of serum microRNA signature in patients with pancreatic cancer	Julia S Johansen	julia.johansen@post3.tele.dk	Denmark	The potential diagnostic value of serum microRNA signature in patients with pancreatic cancer	Not mentioned	Yes	Prospective	Serum	No cyst puncture	2003-08-01	2011-07-01	PDAC	Yes	1	Novel	miR‐196a (L)	Single marker	yes	PDAC vs Healthy	198	104	94	38-89	67	n	Histologically	n	Stage (I/II/III/IV/not known) (3/49/37/105/1)	no		153	63	90	18-69	42	na	volunteer
#4703	PMID: 27464352	The potential diagnostic value of serum microRNA signature in patients with pancreatic cancer	Julia S Johansen	julia.johansen@post3.tele.dk	Denmark	The potential diagnostic value of serum microRNA signature in patients with pancreatic cancer	Not mentioned	Yes	Prospective	Serum	No cyst puncture	2003-08-01	2011-07-01	PDAC	Yes	1	Novel	miR‐195	Single marker	yes	PDAC vs Healthy	198	104	94	38-89	67	n	Histologically	n	Stage (I/II/III/IV/not known) (3/49/37/105/1)	no		153	63	90	18-69	42	na	volunteer
#4703	PMID: 27464352	The potential diagnostic value of serum microRNA signature in patients with pancreatic cancer	Julia S Johansen	julia.johansen@post3.tele.dk	Denmark	The potential diagnostic value of serum microRNA signature in patients with pancreatic cancer	Not mentioned	Yes	Prospective	Serum	No cyst puncture	2003-08-01	2011-07-01	PDAC	Yes	1	Novel	miR‐485.3p	Single marker	yes	PDAC vs Healthy	198	104	94	38-89	67	n	Histologically	n	Stage (I/II/III/IV/not known) (3/49/37/105/1)	no		153	63	90	18-69	42	na	volunteer
#4703	PMID: 27464352	The potential diagnostic value of serum microRNA signature in patients with pancreatic cancer	Julia S Johansen	julia.johansen@post3.tele.dk	Denmark	The potential diagnostic value of serum microRNA signature in patients with pancreatic cancer	Not mentioned	Yes	Prospective	Serum	No cyst puncture	2003-08-01	2011-07-01	PDAC	Yes	1	Novel	miR‐29c	Single marker	yes	PDAC vs Healthy	198	104	94	38-89	67	n	Histologically	n	Stage (I/II/III/IV/not known) (3/49/37/105/1)	no		153	63	90	18-69	42	na	volunteer
#4703	PMID: 27464352	The potential diagnostic value of serum microRNA signature in patients with pancreatic cancer	Julia S Johansen	julia.johansen@post3.tele.dk	Denmark	The potential diagnostic value of serum microRNA signature in patients with pancreatic cancer	Not mentioned	Yes	Prospective	Serum	No cyst puncture	2003-08-01	2011-07-01	PDAC	Yes	1	Novel	miR‐18a (L)	Single marker	yes	PDAC vs Healthy	198	104	94	38-89	67	n	Histologically	n	Stage (I/II/III/IV/not known) (3/49/37/105/1)	no		153	63	90	18-69	42	na	volunteer
#4703	PMID: 27464352	The potential diagnostic value of serum microRNA signature in patients with pancreatic cancer	Julia S Johansen	julia.johansen@post3.tele.dk	Denmark	The potential diagnostic value of serum microRNA signature in patients with pancreatic cancer	Not mentioned	Yes	Prospective	Serum	No cyst puncture	2003-08-01	2011-07-01	PDAC	Yes	1	Novel	miR‐483.5p	Single marker	yes	PDAC vs Healthy	198	104	94	38-89	67	n	Histologically	n	Stage (I/II/III/IV/not known) (3/49/37/105/1)	no		153	63	90	18-69	42	na	volunteer
#4703	PMID: 27464352	The potential diagnostic value of serum microRNA signature in patients with pancreatic cancer	Julia S Johansen	julia.johansen@post3.tele.dk	Denmark	The potential diagnostic value of serum microRNA signature in patients with pancreatic cancer	Not mentioned	Yes	Prospective	Serum	No cyst puncture	2003-08-01	2011-07-01	PDAC	Yes	1	Novel	miR‐345	Single marker	yes	PDAC vs Healthy	86	49	37	46-86	67	no	Histologically	n	Stage (I/II/III/IV/not known) (1/13/22/49/0)	no		44	22	22	41-65	55		volunteer
#4703	PMID: 27464352	The potential diagnostic value of serum microRNA signature in patients with pancreatic cancer	Julia S Johansen	julia.johansen@post3.tele.dk	Denmark	The potential diagnostic value of serum microRNA signature in patients with pancreatic cancer	Not mentioned	Yes	Prospective	Serum	No cyst puncture	2003-08-01	2011-07-01	PDAC	Yes	1	Novel	miR‐483.5p	Single marker	yes	PDAC vs Healthy	86	49	37	46-86	67	no	Histologically	n	Stage (I/II/III/IV/not known) (1/13/22/49/0)	no		44	22	22	41-65	55		volunteer
#4703	PMID: 27464352	The potential diagnostic value of serum microRNA signature in patients with pancreatic cancer	Julia S Johansen	julia.johansen@post3.tele.dk	Denmark	The potential diagnostic value of serum microRNA signature in patients with pancreatic cancer	Not mentioned	Yes	Prospective	Serum	No cyst puncture	2003-08-01	2011-07-01	PDAC	Yes	2	CA19-9	miR‐483.5p & CA19-9	Multi-marker panel	yes	PDAC vs Healthy	86	49	37	46-86	67	no	Histologically	n	Stage (I/II/III/IV/not known) (1/13/22/49/0)	no		44	22	22	41-65	55		volunteer
#4703	PMID: 27464352	The potential diagnostic value of serum microRNA signature in patients with pancreatic cancer	Julia S Johansen	julia.johansen@post3.tele.dk	Denmark	The potential diagnostic value of serum microRNA signature in patients with pancreatic cancer	Not mentioned	Yes	Prospective	Serum	No cyst puncture	2003-08-01	2011-07-01	PDAC	Yes	7	Novel	miR-16 & miR-27a & miR-30a.5p & miR-323.3 p & miR-20a & miR-29c & miR-483.5p	Multi-marker panel	yes	PDAC vs Benign	133	86	47	31-86	63	n	Histologically	n	Stage (I/II/III/IV/not known) (4/80/10/37/2)	no																	72	HS+CP
#4703	PMID: 27464352	The potential diagnostic value of serum microRNA signature in patients with pancreatic cancer	Julia S Johansen	julia.johansen@post3.tele.dk	Denmark	The potential diagnostic value of serum microRNA signature in patients with pancreatic cancer	Not mentioned	Yes	Prospective	Serum	No cyst puncture	2003-08-01	2011-07-01	PDAC	Yes	8	CA19-9	miR-16 & miR-27a & miR-30a.5p & miR-323.3 p & miR-20a & miR-29c & miR-483.5p & CA19-9	Multi-marker panel	yes	PDAC vs Benign	133	86	47	31-86	63	n	Histologically	n	Stage (I/II/III/IV/not known) (4/80/10/37/2)	no																	72	HS+CP
#4703	PMID: 27464352	The potential diagnostic value of serum microRNA signature in patients with pancreatic cancer	Julia S Johansen	julia.johansen@post3.tele.dk	Denmark	The potential diagnostic value of serum microRNA signature in patients with pancreatic cancer	Not mentioned	Yes	Prospective	Serum	No cyst puncture	2003-08-01	2011-07-01	PDAC	Yes	9	Novel	miR-16 & 0.56*miR-24 & 0.25*miR-27.a & 0.55*miR-30a.5p & 0.18*miR-323.3p & 0.44*miR-20a & 20.37*miR-25 & 0.20*miR-29c & 0.71*miR-483.5p	Multi-marker panel	yes	PDAC vs Benign	133	86	47	31-86	63	n	Histologically	n	Stage (I/II/III/IV/not known) (4/80/10/37/2)	no																	72	HS+CP
#4703	PMID: 27464352	The potential diagnostic value of serum microRNA signature in patients with pancreatic cancer	Julia S Johansen	julia.johansen@post3.tele.dk	Denmark	The potential diagnostic value of serum microRNA signature in patients with pancreatic cancer	Not mentioned	Yes	Prospective	Serum	No cyst puncture	2003-08-01	2011-07-01	PDAC	Yes	10	CA19-9	miR-16 & 0.56*miR-24 & 0.25*miR-27.a & 0.55*miR-30a.5p & 0.18*miR-323.3p & 0.44*miR-20a & 20.37*miR-25 & 0.20*miR-29c & 0.71*miR-483.5p & CA19-9	Multi-marker panel	yes	PDAC vs Benign	133	86	47	31-86	63	n	Histologically	n	Stage (I/II/III/IV/not known) (4/80/10/37/2)	no																	72	HS+CP
#4703	PMID: 27464352	The potential diagnostic value of serum microRNA signature in patients with pancreatic cancer	Julia S Johansen	julia.johansen@post3.tele.dk	Denmark	The potential diagnostic value of serum microRNA signature in patients with pancreatic cancer	Not mentioned	Yes	Prospective	Serum	No cyst puncture	2003-08-01	2011-07-01	PDAC	Yes	1	CA19-9	CA19-9	Single marker	yes	PDAC vs Benign	133	86	47	31-86	63	n	Histologically	n	Stage (I/II/III/IV/not known) (4/80/10/37/2)	no																	72	HS+CP
#4703	PMID: 27464352	The potential diagnostic value of serum microRNA signature in patients with pancreatic cancer	Julia S Johansen	julia.johansen@post3.tele.dk	Denmark	The potential diagnostic value of serum microRNA signature in patients with pancreatic cancer	Not mentioned	Yes	Prospective	Serum	No cyst puncture	2003-08-01	2011-07-01	PDAC	Yes	7	Novel	miR-16 & miR-27a & miR-30a.5p & miR-323.3 p & miR-20a & miR-29c & miR-483.5p	Multi-marker panel	yes	PDAC vs Benign	198	104	94	38-89	67	n	Histologically	n	Stage (I/II/III/IV/not known) (3/49/37/105/1)	no																	184	HS+CP
#4703	PMID: 27464352	The potential diagnostic value of serum microRNA signature in patients with pancreatic cancer	Julia S Johansen	julia.johansen@post3.tele.dk	Denmark	The potential diagnostic value of serum microRNA signature in patients with pancreatic cancer	Not mentioned	Yes	Prospective	Serum	No cyst puncture	2003-08-01	2011-07-01	PDAC	Yes	8	CA19-9	miR-16 & miR-27a & miR-30a.5p & miR-323.3 p & miR-20a & miR-29c & miR-483.5p & CA19-9	Multi-marker panel	yes	PDAC vs Benign	198	104	94	38-89	67	n	Histologically	n	Stage (I/II/III/IV/not known) (3/49/37/105/1)	no																	184	HS+CP
#4703	PMID: 27464352	The potential diagnostic value of serum microRNA signature in patients with pancreatic cancer	Julia S Johansen	julia.johansen@post3.tele.dk	Denmark	The potential diagnostic value of serum microRNA signature in patients with pancreatic cancer	Not mentioned	Yes	Prospective	Serum	No cyst puncture	2003-08-01	2011-07-01	PDAC	Yes	9	Novel	miR-16 & 0.56*miR-24 & 0.25*miR-27.a & 0.55*miR-30a.5p & 0.18*miR-323.3p & 0.44*miR-20a & 20.37*miR-25 & 0.20*miR-29c & 0.71*miR-483.5p	Multi-marker panel	yes	PDAC vs Benign	198	104	94	38-89	67	n	Histologically	n	Stage (I/II/III/IV/not known) (3/49/37/105/1)	no																	184	HS+CP
#4703	PMID: 27464352	The potential diagnostic value of serum microRNA signature in patients with pancreatic cancer	Julia S Johansen	julia.johansen@post3.tele.dk	Denmark	The potential diagnostic value of serum microRNA signature in patients with pancreatic cancer	Not mentioned	Yes	Prospective	Serum	No cyst puncture	2003-08-01	2011-07-01	PDAC	Yes	10	CA19-9	miR-16 & 0.56*miR-24 & 0.25*miR-27.a & 0.55*miR-30a.5p & 0.18*miR-323.3p & 0.44*miR-20a & 20.37*miR-25 & 0.20*miR-29c & 0.71*miR-483.5p & CA19-9	Multi-marker panel	yes	PDAC vs Benign	198	104	94	38-89	67	n	Histologically	n	Stage (I/II/III/IV/not known) (3/49/37/105/1)	no																	184	HS+CP
#4703	PMID: 27464352	The potential diagnostic value of serum microRNA signature in patients with pancreatic cancer	Julia S Johansen	julia.johansen@post3.tele.dk	Denmark	The potential diagnostic value of serum microRNA signature in patients with pancreatic cancer	Not mentioned	Yes	Prospective	Serum	No cyst puncture	2003-08-01	2011-07-01	PDAC	Yes	1	CA19-9	CA19-9	Single marker	yes	PDAC vs Benign	198	104	94	38-89	67	n	Histologically	n	Stage (I/II/III/IV/not known) (3/49/37/105/1)	no																	184	HS+CP
#4703	PMID: 27464352	The potential diagnostic value of serum microRNA signature in patients with pancreatic cancer	Julia S Johansen	julia.johansen@post3.tele.dk	Denmark	The potential diagnostic value of serum microRNA signature in patients with pancreatic cancer	Not mentioned	Yes	Prospective	Serum	No cyst puncture	2003-08-01	2011-07-01	PDAC	Yes	7	Novel	miR-16 & miR-27a & miR-30a.5p & miR-323.3 p & miR-20a & miR-29c & miR-483.5p	Multi-marker panel	yes	PDAC vs Benign	86	49	37	46-86	67	no	Histologically	n	Stage (I/II/III/IV/not known) (1/13/22/49/0)	no																	51	HS+CP
#4703	PMID: 27464352	The potential diagnostic value of serum microRNA signature in patients with pancreatic cancer	Julia S Johansen	julia.johansen@post3.tele.dk	Denmark	The potential diagnostic value of serum microRNA signature in patients with pancreatic cancer	Not mentioned	Yes	Prospective	Serum	No cyst puncture	2003-08-01	2011-07-01	PDAC	Yes	8	CA19-9	miR-16 & miR-27a & miR-30a.5p & miR-323.3 p & miR-20a & miR-29c & miR-483.5p & CA19-9	Multi-marker panel	yes	PDAC vs Benign	86	49	37	46-86	67	no	Histologically	n	Stage (I/II/III/IV/not known) (1/13/22/49/0)	no																	51	HS+CP
#4703	PMID: 27464352	The potential diagnostic value of serum microRNA signature in patients with pancreatic cancer	Julia S Johansen	julia.johansen@post3.tele.dk	Denmark	The potential diagnostic value of serum microRNA signature in patients with pancreatic cancer	Not mentioned	Yes	Prospective	Serum	No cyst puncture	2003-08-01	2011-07-01	PDAC	Yes	9	Novel	miR-16 & 0.56*miR-24 & 0.25*miR-27.a & 0.55*miR-30a.5p & 0.18*miR-323.3p & 0.44*miR-20a & 20.37*miR-25 & 0.20*miR-29c & 0.71*miR-483.5p	Multi-marker panel	yes	PDAC vs Benign	86	49	37	46-86	67	no	Histologically	n	Stage (I/II/III/IV/not known) (1/13/22/49/0)	no																	51	HS+CP
#4703	PMID: 27464352	The potential diagnostic value of serum microRNA signature in patients with pancreatic cancer	Julia S Johansen	julia.johansen@post3.tele.dk	Denmark	The potential diagnostic value of serum microRNA signature in patients with pancreatic cancer	Not mentioned	Yes	Prospective	Serum	No cyst puncture	2003-08-01	2011-07-01	PDAC	Yes	10	CA19-9	miR-16 & 0.56*miR-24 & 0.25*miR-27.a & 0.55*miR-30a.5p & 0.18*miR-323.3p & 0.44*miR-20a & 20.37*miR-25 & 0.20*miR-29c & 0.71*miR-483.5p & CA19-9	Multi-marker panel	yes	PDAC vs Benign	86	49	37	46-86	67	no	Histologically	n	Stage (I/II/III/IV/not known) (1/13/22/49/0)	no																	51	HS+CP
#4703	PMID: 27464352	The potential diagnostic value of serum microRNA signature in patients with pancreatic cancer	Julia S Johansen	julia.johansen@post3.tele.dk	Denmark	The potential diagnostic value of serum microRNA signature in patients with pancreatic cancer	Not mentioned	Yes	Prospective	Serum	No cyst puncture	2003-08-01	2011-07-01	PDAC	Yes	1	CA19-9	CA19-9	Single marker	yes	PDAC vs Benign	86	49	37	46-86	67	no	Histologically	n	Stage (I/II/III/IV/not known) (1/13/22/49/0)	no																	51	HS+CP
#4703	PMID: 27464352	The potential diagnostic value of serum microRNA signature in patients with pancreatic cancer	Julia S Johansen	julia.johansen@post3.tele.dk	Denmark	The potential diagnostic value of serum microRNA signature in patients with pancreatic cancer	Not mentioned	Yes	Prospective	Serum	No cyst puncture	2003-08-01	2011-07-01	PDAC	Yes	5	Novel	miR-16 1 & miR-27a & miR-25 & miR-29c & miR-483.5p	Multi-marker panel	yes	PDAC vs Healthy	133	86	47	31-86	63	n	Histologically	n	Stage (I/II/III/IV/not known) (4/80/10/37/2)	no		51	23	28	41-66	61		volunteer
#4703	PMID: 27464352	The potential diagnostic value of serum microRNA signature in patients with pancreatic cancer	Julia S Johansen	julia.johansen@post3.tele.dk	Denmark	The potential diagnostic value of serum microRNA signature in patients with pancreatic cancer	Not mentioned	Yes	Prospective	Serum	No cyst puncture	2003-08-01	2011-07-01	PDAC	Yes	6	CA19-9	miR-16 1 & miR-27a & miR-25 & miR-29c & miR-483.5p & CA19-9	Multi-marker panel	yes	PDAC vs Healthy	133	86	47	31-86	63	n	Histologically	n	Stage (I/II/III/IV/not known) (4/80/10/37/2)	no		51	23	28	41-67	62		volunteer
#4703	PMID: 27464352	The potential diagnostic value of serum microRNA signature in patients with pancreatic cancer	Julia S Johansen	julia.johansen@post3.tele.dk	Denmark	The potential diagnostic value of serum microRNA signature in patients with pancreatic cancer	Not mentioned	Yes	Prospective	Serum	No cyst puncture	2003-08-01	2011-07-01	PDAC	Yes	12	Novel	1.92*miR-16 & 0.12*miR-18.a & 11.38*miR-24 & 0.67*miR-27a & 0.60*miR-30a.5p & 0.36*miR-323.3p & 1.37*miR-20a & 0.61*miR-25 & 0.55*miR-29c & 0.37*miR-191 & 0.44*miR-345 & 1.03*miR-483.5p	Multi-marker panel	yes	PDAC vs Healthy	133	86	47	31-86	63	n	Histologically	n	Stage (I/II/III/IV/not known) (4/80/10/37/2)	no		51	23	28	41-68	63		volunteer
#4703	PMID: 27464352	The potential diagnostic value of serum microRNA signature in patients with pancreatic cancer	Julia S Johansen	julia.johansen@post3.tele.dk	Denmark	The potential diagnostic value of serum microRNA signature in patients with pancreatic cancer	Not mentioned	Yes	Prospective	Serum	No cyst puncture	2003-08-01	2011-07-01	PDAC	Yes	13	CA19-9	1.92*miR-16 & 0.12*miR-18.a & 11.38*miR-24 & 0.67*miR-27a & 0.60*miR-30a.5p & 0.36*miR-323.3p & 1.37*miR-20a & 0.61*miR-25 & 0.55*miR-29c & 0.37*miR-191 & 0.44*miR-345 & 1.03*miR-483.5p & CA19-9	Multi-marker panel	yes	PDAC vs Healthy	133	86	47	31-86	63	n	Histologically	n	Stage (I/II/III/IV/not known) (4/80/10/37/2)	no		51	23	28	41-69	64		volunteer
#4703	PMID: 27464352	The potential diagnostic value of serum microRNA signature in patients with pancreatic cancer	Julia S Johansen	julia.johansen@post3.tele.dk	Denmark	The potential diagnostic value of serum microRNA signature in patients with pancreatic cancer	Not mentioned	Yes	Prospective	Serum	No cyst puncture	2003-08-01	2011-07-01	PDAC	Yes	1	CA19-9	CA19-9	Single marker	yes	PDAC vs Healthy	133	86	47	31-87	64	n	Histologically	n	Stage (I/II/III/IV/not known) (4/80/10/37/2)	no		51	23	28	41-70	65		volunteer
#4703	PMID: 27464352	The potential diagnostic value of serum microRNA signature in patients with pancreatic cancer	Julia S Johansen	julia.johansen@post3.tele.dk	Denmark	The potential diagnostic value of serum microRNA signature in patients with pancreatic cancer	Not mentioned	Yes	Prospective	Serum	No cyst puncture	2003-08-01	2011-07-01	PDAC	Yes	5	Novel	miR-16 1 & miR-27a & miR-25 & miR-29c & miR-483.5p	Multi-marker panel	yes	PDAC vs Healthy	198	104	94	38-89	67	n	Histologically	n	Stage (I/II/III/IV/not known) (3/49/37/105/1)	no		153	63	90	18-69	42	na	volunteer
#4703	PMID: 27464352	The potential diagnostic value of serum microRNA signature in patients with pancreatic cancer	Julia S Johansen	julia.johansen@post3.tele.dk	Denmark	The potential diagnostic value of serum microRNA signature in patients with pancreatic cancer	Not mentioned	Yes	Prospective	Serum	No cyst puncture	2003-08-01	2011-07-01	PDAC	Yes	6	CA19-9	miR-16 1 & miR-27a & miR-25 & miR-29c & miR-483.5p & CA19-9	Multi-marker panel	yes	PDAC vs Healthy	198	104	94	38-89	67	n	Histologically	n	Stage (I/II/III/IV/not known) (3/49/37/105/1)	no		153	63	90	18-69	42	na	volunteer
#4703	PMID: 27464352	The potential diagnostic value of serum microRNA signature in patients with pancreatic cancer	Julia S Johansen	julia.johansen@post3.tele.dk	Denmark	The potential diagnostic value of serum microRNA signature in patients with pancreatic cancer	Not mentioned	Yes	Prospective	Serum	No cyst puncture	2003-08-01	2011-07-01	PDAC	Yes	12	Novel	1.92*miR-16 & 0.12*miR-18.a & 11.38*miR-24 & 0.67*miR-27a & 0.60*miR-30a.5p & 0.36*miR-323.3p & 1.37*miR-20a & 0.61*miR-25 & 0.55*miR-29c & 0.37*miR-191 & 0.44*miR-345 & 1.03*miR-483.5p	Multi-marker panel	yes	PDAC vs Healthy	198	104	94	38-89	67	n	Histologically	n	Stage (I/II/III/IV/not known) (3/49/37/105/1)	no		153	63	90	18-69	42	na	volunteer
#4703	PMID: 27464352	The potential diagnostic value of serum microRNA signature in patients with pancreatic cancer	Julia S Johansen	julia.johansen@post3.tele.dk	Denmark	The potential diagnostic value of serum microRNA signature in patients with pancreatic cancer	Not mentioned	Yes	Prospective	Serum	No cyst puncture	2003-08-01	2011-07-01	PDAC	Yes	13	CA19-9	1.92*miR-16 & 0.12*miR-18.a & 11.38*miR-24 & 0.67*miR-27a & 0.60*miR-30a.5p & 0.36*miR-323.3p & 1.37*miR-20a & 0.61*miR-25 & 0.55*miR-29c & 0.37*miR-191 & 0.44*miR-345 & 1.03*miR-483.5p & CA19-9	Multi-marker panel	yes	PDAC vs Healthy	198	104	94	38-89	67	n	Histologically	n	Stage (I/II/III/IV/not known) (3/49/37/105/1)	no		153	63	90	18-69	42	na	volunteer
#4703	PMID: 27464352	The potential diagnostic value of serum microRNA signature in patients with pancreatic cancer	Julia S Johansen	julia.johansen@post3.tele.dk	Denmark	The potential diagnostic value of serum microRNA signature in patients with pancreatic cancer	Not mentioned	Yes	Prospective	Serum	No cyst puncture	2003-08-01	2011-07-01	PDAC	Yes	1	CA19-9	CA19-9	Single marker	yes	PDAC vs Healthy	198	104	94	38-89	67	n	Histologically	n	Stage (I/II/III/IV/not known) (3/49/37/105/1)	no		153	63	90	18-69	42	na	volunteer
#4703	PMID: 27464352	The potential diagnostic value of serum microRNA signature in patients with pancreatic cancer	Julia S Johansen	julia.johansen@post3.tele.dk	Denmark	The potential diagnostic value of serum microRNA signature in patients with pancreatic cancer	Not mentioned	Yes	Prospective	Serum	No cyst puncture	2003-08-01	2011-07-01	PDAC	Yes	5	Novel	miR-16 1 & miR-27a & miR-25 & miR-29c & miR-483.5p	Multi-marker panel	yes	PDAC vs Healthy	86	49	37	46-86	67	no	Histologically	n	Stage (I/II/III/IV/not known) (1/13/22/49/0)	no		44	22	22	41-65	55		volunteer
#4703	PMID: 27464352	The potential diagnostic value of serum microRNA signature in patients with pancreatic cancer	Julia S Johansen	julia.johansen@post3.tele.dk	Denmark	The potential diagnostic value of serum microRNA signature in patients with pancreatic cancer	Not mentioned	Yes	Prospective	Serum	No cyst puncture	2003-08-01	2011-07-01	PDAC	Yes	6	CA19-9	miR-16 1 & miR-27a & miR-25 & miR-29c & miR-483.5p & CA19-9	Multi-marker panel	yes	PDAC vs Healthy	86	49	37	46-86	67	no	Histologically	n	Stage (I/II/III/IV/not known) (1/13/22/49/0)	no		44	22	22	41-65	55		volunteer
#4703	PMID: 27464352	The potential diagnostic value of serum microRNA signature in patients with pancreatic cancer	Julia S Johansen	julia.johansen@post3.tele.dk	Denmark	The potential diagnostic value of serum microRNA signature in patients with pancreatic cancer	Not mentioned	Yes	Prospective	Serum	No cyst puncture	2003-08-01	2011-07-01	PDAC	Yes	12	Novel	1.92*miR-16 & 0.12*miR-18.a & 11.38*miR-24 & 0.67*miR-27a & 0.60*miR-30a.5p & 0.36*miR-323.3p & 1.37*miR-20a & 0.61*miR-25 & 0.55*miR-29c & 0.37*miR-191 & 0.44*miR-345 & 1.03*miR-483.5p	Multi-marker panel	yes	PDAC vs Healthy	86	49	37	46-86	67	no	Histologically	n	Stage (I/II/III/IV/not known) (1/13/22/49/0)	no		44	22	22	41-65	55		volunteer
#4703	PMID: 27464352	The potential diagnostic value of serum microRNA signature in patients with pancreatic cancer	Julia S Johansen	julia.johansen@post3.tele.dk	Denmark	The potential diagnostic value of serum microRNA signature in patients with pancreatic cancer	Not mentioned	Yes	Prospective	Serum	No cyst puncture	2003-08-01	2011-07-01	PDAC	Yes	13	CA19-9	1.92*miR-16 & 0.12*miR-18.a & 11.38*miR-24 & 0.67*miR-27a & 0.60*miR-30a.5p & 0.36*miR-323.3p & 1.37*miR-20a & 0.61*miR-25 & 0.55*miR-29c & 0.37*miR-191 & 0.44*miR-345 & 1.03*miR-483.5p & CA19-9	Multi-marker panel	yes	PDAC vs Healthy	86	49	37	46-86	67	no	Histologically	n	Stage (I/II/III/IV/not known) (1/13/22/49/0)	no		44	22	22	41-65	55		volunteer
#4703	PMID: 27464352	The potential diagnostic value of serum microRNA signature in patients with pancreatic cancer	Julia S Johansen	julia.johansen@post3.tele.dk	Denmark	The potential diagnostic value of serum microRNA signature in patients with pancreatic cancer	Not mentioned	Yes	Prospective	Serum	No cyst puncture	2003-08-01	2011-07-01	PDAC	Yes	1	CA19-9	CA19-9	Single marker	yes	PDAC vs Healthy	86	49	37	46-86	67	no	Histologically	n	Stage (I/II/III/IV/not known) (1/13/22/49/0)	no		44	22	22	41-65	55		volunteer
#7432	PMID: 32278036	Metabolomics identified new biomarkers for the precise diagnosis of pancreatic cancer and associated tissue metastasis	H Wang	whuaizhi@gmail.com	China	This work was supported by the National Key R&D Program ofChina (No. 2017YFC1308600 and 2017YFC1308605), the NationalNatural Science Foundation of China Grants (No. 31670031), theStartup Funding for Specialized Professorship Provided by ShanghaiJiao Tong University (No. WF220441502).	None Declared	Yes	Prospective	Plasma	Prior to surgical resection	2003-08-01	2011-07-01	PC	Yes	5	Novel	beta-sitosterol & sphinganine & creatine & inosine & glycholic acid	Multi-marker panel	not stated	PDAC vs Healthy	60	38	22	37-79			Histologically	No	Stage (I/II/III/IV/not known) (21/13/13/11)	no		60	31	29	38-80			Volunteer blood donors
#7432	PMID: 32278036	Metabolomics identified new biomarkers for the precise diagnosis of pancreatic cancer and associated tissue metastasis	H Wang	whuaizhi@gmail.com	China	This work was supported by the National Key R&D Program ofChina (No. 2017YFC1308600 and 2017YFC1308605), the NationalNatural Science Foundation of China Grants (No. 31670031), theStartup Funding for Specialized Professorship Provided by ShanghaiJiao Tong University (No. WF220441502).	None Declared	Yes	Prospective	Plasma	Prior to surgical resection	2003-08-01	2011-07-01	PC	Yes	1	Novel	beta-sitosterol	Single marker	not stated	PDAC vs Healthy	60	38	22	37-79			Histologically	No	Stage (I/II/III/IV/not known) (21/13/13/11)	no		60	31	29	38-80			Volunteer blood donors
#7432	PMID: 32278036	Metabolomics identified new biomarkers for the precise diagnosis of pancreatic cancer and associated tissue metastasis	H Wang	whuaizhi@gmail.com	China	This work was supported by the National Key R&D Program ofChina (No. 2017YFC1308600 and 2017YFC1308605), the NationalNatural Science Foundation of China Grants (No. 31670031), theStartup Funding for Specialized Professorship Provided by ShanghaiJiao Tong University (No. WF220441502).	None Declared	Yes	Prospective	Plasma	Prior to surgical resection	2003-08-01	2011-07-01	PC	Yes	1	Novel	sphinganine	Single marker	not stated	PDAC vs Healthy	60	38	22	37-79			Histologically	No	Stage (I/II/III/IV/not known) (21/13/13/11)	no		60	31	29	38-80			Volunteer blood donors
#7432	PMID: 32278036	Metabolomics identified new biomarkers for the precise diagnosis of pancreatic cancer and associated tissue metastasis	H Wang	whuaizhi@gmail.com	China	This work was supported by the National Key R&D Program ofChina (No. 2017YFC1308600 and 2017YFC1308605), the NationalNatural Science Foundation of China Grants (No. 31670031), theStartup Funding for Specialized Professorship Provided by ShanghaiJiao Tong University (No. WF220441502).	None Declared	Yes	Prospective	Plasma	Prior to surgical resection	2003-08-01	2011-07-01	PC	Yes	1	Novel	creatine	Single marker	not stated	PDAC vs Healthy	60	38	22	37-79			Histologically	No	Stage (I/II/III/IV/not known) (21/13/13/11)	no		60	31	29	38-80			Volunteer blood donors
#7432	PMID: 32278036	Metabolomics identified new biomarkers for the precise diagnosis of pancreatic cancer and associated tissue metastasis	H Wang	whuaizhi@gmail.com	China	This work was supported by the National Key R&D Program ofChina (No. 2017YFC1308600 and 2017YFC1308605), the NationalNatural Science Foundation of China Grants (No. 31670031), theStartup Funding for Specialized Professorship Provided by ShanghaiJiao Tong University (No. WF220441502).	None Declared	Yes	Prospective	Plasma	Prior to surgical resection	2017-07-01	2018-11-01	PC	Yes	1	Novel	inosine	Single marker	not stated	PDAC vs Healthy	60	38	22	37-79			Histologically	No	Stage (I/II/III/IV/not known) (21/13/13/11)	no		60	31	29	38-80			Volunteer blood donors
#7432	PMID: 32278036	Metabolomics identified new biomarkers for the precise diagnosis of pancreatic cancer and associated tissue metastasis	H Wang	whuaizhi@gmail.com	China	This work was supported by the National Key R&D Program ofChina (No. 2017YFC1308600 and 2017YFC1308605), the NationalNatural Science Foundation of China Grants (No. 31670031), theStartup Funding for Specialized Professorship Provided by ShanghaiJiao Tong University (No. WF220441502).	None Declared	Yes	Prospective	Plasma	Prior to surgical resection	2017-07-01	2018-11-01	PC	Yes	1	Novel	glycholic acid	Single marker	not stated	PDAC vs Healthy	60	38	22	37-79			Histologically	No	Stage (I/II/III/IV/not known) (21/13/13/11)	no		60	31	29	38-80			Volunteer blood donors
#956	PMID: 20139773	Soluble iC3b as an early marker for pancreatic adenocarcinoma is superior to CA19.9 and radiology	Angela Marten	angela.maerten@med.uni-heidelberg.de	Germany	Not given	None Declared	yes	Prospective	Plasma	During treatment	2017-07-01	2018-11-01	PDAC	Yes	1	Novel	siC3b	Single marker		PDAC vs Healthy	171						Histologically	no		yes	chemotherapy (5-FU, gemcitabine), targeted therapy (cetuximab), and chemoradioimmunotherapy (CapRI scheme)	38
#956	PMID: 20139773	Soluble iC3b as an early marker for pancreatic adenocarcinoma is superior to CA19.9 and radiology	Angela Marten	angela.maerten@med.uni-heidelberg.de	Germany	Not given	None Declared	yes	Prospective	Plasma	During treatment	2017-07-01	2018-11-01	PDAC	Yes	2	CA19-9	siC3b & CA19-9	Multi-marker panel		PDAC vs Healthy	100						Histologically	No		yes	chemotherapy (5-FU, gemcitabine), targeted therapy (cetuximab), and chemoradioimmunotherapy (CapRI scheme)	30
#2276	PMID: 22675630	Seven-signal proteomic signature for detection of operable pancreatic ductal adenocarcinoma and their discrimination from autoimmune pancreatitis	Kiyoshi Yanagisawa	kyana@med.nagoya-u.ac.jp	Japan	This work was supported in part by a Grant-in-Aid for Exploratory Research and Program for Improvement of Research Environment for Young Researchers from Special Coordination Funds for Promoting Science and Technology commissioned and a Grant-in-Aid for Scientific Research on Priority Areas, a Grant-in-Aid for Scientific Research (C) by the Ministry of Education, Culture, Sports, Science and Tech…	The sponsors of the study had no role in its design, data collection, analysis, and interpretation of data, the decision to submit the manuscript for publication, or writing the manuscript.	Yes	Prospective	Plasma	No details given	2017-07-01	2018-11-01	PDAC	Yes	Unknown	Novel	Proteomic Signature	Multi-marker panel	not stated	PDAC vs Healthy	80							no	I-3. II - 8, III -8, Iva-14, Ivb- 47	unclear		80
#2276	PMID: 22675630	Seven-signal proteomic signature for detection of operable pancreatic ductal adenocarcinoma and their discrimination from autoimmune pancreatitis	Kiyoshi Yanagisawa	kyana@med.nagoya-u.ac.jp	Japan	This work was supported in part by a Grant-in-Aid for Exploratory Research and Program for Improvement of Research Environment for Young Researchers from Special Coordination Funds for Promoting Science and Technology commissioned and a Grant-in-Aid for Scientific Research on Priority Areas, a Grant-in-Aid for Scientific Research (C) by the Ministry of Education, Culture, Sports, Science and Tech…	The sponsors of the study had no role in its design, data collection, analysis, and interpretation of data, the decision to submit the manuscript for publication, or writing the manuscript.	Yes	Prospective	Plasma	No details given	2017-07-01	2018-11-01	PDAC	Yes	Unknown	Novel	Proteomic Signature	Multi-marker panel	not stated	PDAC vs Healthy	46	33	13	10(<60) 36(>60)				no	I-1, II-7, III16, Iva-14, Ivb-8	unclear		67	31	36	33(<60) 33(>60)
#2276	PMID: 22675630	Seven-signal proteomic signature for detection of operable pancreatic ductal adenocarcinoma and their discrimination from autoimmune pancreatitis	Kiyoshi Yanagisawa	kyana@med.nagoya-u.ac.jp	Japan	This work was supported in part by a Grant-in-Aid for Exploratory Research and Program for Improvement of Research Environment for Young Researchers from Special Coordination Funds for Promoting Science and Technology commissioned and a Grant-in-Aid for Scientific Research on Priority Areas, a Grant-in-Aid for Scientific Research (C) by the Ministry of Education, Culture, Sports, Science and Tech…	The sponsors of the study had no role in its design, data collection, analysis, and interpretation of data, the decision to submit the manuscript for publication, or writing the manuscript.	Yes	Prospective	Plasma	No details given			PDAC	Yes	Unknown	Novel	Proteomic Signature	Multi-marker panel	not stated	PDAC vs Benign	46	33	13	10(<60) 36(>60)				no	I-1, II-7, III16, Iva-14, Ivb-8	unclear									16	Autoimmune pancreatitis	16		7 (<60) 9(>60)
#984	PMID: 29865859	Preoperative Biomarker Panel, Including Fibrinogen and FVIII, Improves Diagnostic Accuracy for Pancreatic Ductal Adenocarcinoma	Riitta Lassila	riitta.lassila@hus.fi	Finland	This study was supported by the Finnish Governmental Funding, the Mary and Georg C. Ehrnrooth Foundation, the Sigrid Juse´lius Foundation, and the Finnish Society of Angiology. None of the foundations were involved in the study design	None Declared	Yes	Retrospective	Whole Blood	Preoperative			PDAC	Yes	5	CA19-9	CA19-9 & FVIII & Fibrinogen & Albumin & ALP	Multi-marker panel	yes	PDAC vs Benign	80	40	40	52-81				no	I-III (67), IV (13)	no									18	IPMN	11	7	31-80	66
#984	PMID: 29865859	Preoperative Biomarker Panel, Including Fibrinogen and FVIII, Improves Diagnostic Accuracy for Pancreatic Ductal Adenocarcinoma	Riitta Lassila	riitta.lassila@hus.fi	Finland	This study was supported by the Finnish Governmental Funding, the Mary and Georg C. Ehrnrooth Foundation, the Sigrid Juse´lius Foundation, and the Finnish Society of Angiology. None of the foundations were involved in the study design	None Declared	Yes	Retrospective	Whole Blood	Preoperative	2001-01-01	2006-07-01	PDAC	Yes	5	CA19-9	CA19-9 & FVIII & Fibrinogen & Albumin & conjugated bilirubin	Multi-marker panel	yes	PDAC vs Benign	80	40	40	52-81				no	I-III (67), IV (13)	no									18	IPMN	11	7	31-80	66
#984	PMID: 29865859	Preoperative Biomarker Panel, Including Fibrinogen and FVIII, Improves Diagnostic Accuracy for Pancreatic Ductal Adenocarcinoma	Riitta Lassila	riitta.lassila@hus.fi	Finland	This study was supported by the Finnish Governmental Funding, the Mary and Georg C. Ehrnrooth Foundation, the Sigrid Juse´lius Foundation, and the Finnish Society of Angiology. None of the foundations were involved in the study design	None Declared	Yes	Retrospective	Whole Blood	Preoperative	2001-01-01	2006-07-01	PDAC	Yes	6	CA19-9	CA19-9 & FVIII & Fibrinogen & Albumin & ALP & conjugated bilirubin	Multi-marker panel	yes	PDAC vs Benign	80	40	40	52-81				no	I-III (67), IV (13)	no									18	IPMN	11	7	31-80	66
#984	PMID: 29865859	Preoperative Biomarker Panel, Including Fibrinogen and FVIII, Improves Diagnostic Accuracy for Pancreatic Ductal Adenocarcinoma	Riitta Lassila	riitta.lassila@hus.fi	Finland	This study was supported by the Finnish Governmental Funding, the Mary and Georg C. Ehrnrooth Foundation, the Sigrid Juse´lius Foundation, and the Finnish Society of Angiology. None of the foundations were involved in the study design	None Declared	Yes	Retrospective	Whole Blood	Preoperative	2001-01-01	2006-07-01	PDAC	Yes	1	CA19-9	CA19-9	Single marker	yes	PDAC vs Benign	80	40	40	52-81				no	I-III (67), IV (13)	no									18	IPMN	11	7	31-80	66
#984	PMID: 29865859	Preoperative Biomarker Panel, Including Fibrinogen and FVIII, Improves Diagnostic Accuracy for Pancreatic Ductal Adenocarcinoma	Riitta Lassila	riitta.lassila@hus.fi	Finland	This study was supported by the Finnish Governmental Funding, the Mary and Georg C. Ehrnrooth Foundation, the Sigrid Juse´lius Foundation, and the Finnish Society of Angiology. None of the foundations were involved in the study design	None Declared	Yes	Retrospective	Whole Blood	Preoperative	2010	2015	PDAC	Yes	1	Novel	Factor VIII	Single marker	yes	PDAC vs Benign	80	40	40	52-81				no	I-III (67), IV (13)	no									18	IPMN	11	7	31-80	66
#984	PMID: 29865859	Preoperative Biomarker Panel, Including Fibrinogen and FVIII, Improves Diagnostic Accuracy for Pancreatic Ductal Adenocarcinoma	Riitta Lassila	riitta.lassila@hus.fi	Finland	This study was supported by the Finnish Governmental Funding, the Mary and Georg C. Ehrnrooth Foundation, the Sigrid Juse´lius Foundation, and the Finnish Society of Angiology. None of the foundations were involved in the study design	None Declared	Yes	Retrospective	Whole Blood	Preoperative	2010	2015	PDAC	Yes	1	Novel	Fibrinogen	Single marker	yes	PDAC vs Benign	80	40	40	52-81				no	I-III (67), IV (13)	no									18	IPMN	11	7	31-80	66
#984	PMID: 29865859	Preoperative Biomarker Panel, Including Fibrinogen and FVIII, Improves Diagnostic Accuracy for Pancreatic Ductal Adenocarcinoma	Riitta Lassila	riitta.lassila@hus.fi	Finland	This study was supported by the Finnish Governmental Funding, the Mary and Georg C. Ehrnrooth Foundation, the Sigrid Juse´lius Foundation, and the Finnish Society of Angiology. None of the foundations were involved in the study design	None Declared	Yes	Retrospective	Whole Blood	Preoperative	2010	2015	PDAC	Yes	1	Novel	Albumin	Single marker	yes	PDAC vs Benign	80	40	40	52-81				no	I-III (67), IV (13)	no									18	IPMN	11	7	31-80	66
#984	PMID: 29865859	Preoperative Biomarker Panel, Including Fibrinogen and FVIII, Improves Diagnostic Accuracy for Pancreatic Ductal Adenocarcinoma	Riitta Lassila	riitta.lassila@hus.fi	Finland	This study was supported by the Finnish Governmental Funding, the Mary and Georg C. Ehrnrooth Foundation, the Sigrid Juse´lius Foundation, and the Finnish Society of Angiology. None of the foundations were involved in the study design	None Declared	Yes	Retrospective	Whole Blood	Preoperative	2010	2015	PDAC	Yes	1	Novel	Alkaline Phosphatase	Single marker	yes	PDAC vs Benign	80	40	40	52-81				no	I-III (67), IV (13)	no									18	IPMN	11	7	31-80	66
#1075	PMID: 26101916	Serum dickkopf-1 is a novel serological biomarker for the diagnosis and prognosis of pancreatic cancer	Qing Zhu	newzhuqing1972@yahoo.com	China	Program for New Century Excellent Talents in University supported by ministry of education of P. R. China (Qing Zhu)	None Declared	yes	Prospective	Serum	prior to treatment	2010	2015	PC	Yes	1	Novel	Serum Dickkopf-1	Single marker		PDAC vs Benign	140	88	52	36-84		61.7	Histologically	No	I-16, II-46,III27,IV-51	No
#1075	PMID: 26101916	Serum dickkopf-1 is a novel serological biomarker for the diagnosis and prognosis of pancreatic cancer	Qing Zhu	newzhuqing1972@yahoo.com	China	Program for New Century Excellent Talents in University supported by ministry of education of P. R. China (Qing Zhu)	None Declared	yes	Prospective	Serum	prior to treatment	2010	2015	PC	Yes	1	Novel	Serum Dickkopf-1	Single marker		PDAC vs Benign	140	88	52	36-84		61.7	Histologically	No	I-16, II-46,III27,IV-51	No																	26	Chronic Pancreatitis
#1075	PMID: 26101916	Serum dickkopf-1 is a novel serological biomarker for the diagnosis and prognosis of pancreatic cancer	Qing Zhu	newzhuqing1972@yahoo.com	China	Program for New Century Excellent Talents in University supported by ministry of education of P. R. China (Qing Zhu)	None Declared	yes	Prospective	Serum	prior to treatment	2010	2015	PC	Yes	1	CA19-9	CA19-9	Single marker		PDAC vs Benign	140	88	52	36-84		61.7	Histologically	No	I-16, II-46,III27,IV-52	No
#1075	PMID: 26101916	Serum dickkopf-1 is a novel serological biomarker for the diagnosis and prognosis of pancreatic cancer	Qing Zhu	newzhuqing1972@yahoo.com	China	Program for New Century Excellent Talents in University supported by ministry of education of P. R. China (Qing Zhu)	None Declared	yes	Prospective	Serum	prior to treatment	Januarry 2010	2013-10-01	PC	Yes	2	CA19-9	Serum Dickkopf-1 & CA19-9	Multi-marker panel		PDAC vs Benign	140	88	52	36-84		61.7	Histologically	No	I-16, II-46,III27,IV-53	No
#1075	PMID: 26101916	Serum dickkopf-1 is a novel serological biomarker for the diagnosis and prognosis of pancreatic cancer	Qing Zhu	newzhuqing1972@yahoo.com	China	Program for New Century Excellent Talents in University supported by ministry of education of P. R. China (Qing Zhu)	None Declared	yes	Prospective	Serum	prior to treatment	Januarry 2010	2013-10-01	PC	Yes	1	Novel	Serum Dickkopf-1	Single marker		PDAC vs Benign	140	88	52	36-84		61.7	Histologically	No	I-16, II-46,III27,IV-54	No
#1075	PMID: 26101916	Serum dickkopf-1 is a novel serological biomarker for the diagnosis and prognosis of pancreatic cancer	Qing Zhu	newzhuqing1972@yahoo.com	China	Program for New Century Excellent Talents in University supported by ministry of education of P. R. China (Qing Zhu)	None Declared	yes	Prospective	Serum	prior to treatment	Januarry 2010	2013-10-01	PC	Yes	1	CA19-9	CA19-9	Single marker		PDAC vs Benign	140	88	52	36-84		61.7	Histologically	No	I-16, II-46,III27,IV-55	No
#1075	PMID: 26101916	Serum dickkopf-1 is a novel serological biomarker for the diagnosis and prognosis of pancreatic cancer	Qing Zhu	newzhuqing1972@yahoo.com	China	Program for New Century Excellent Talents in University supported by ministry of education of P. R. China (Qing Zhu)	None Declared	yes	Prospective	Serum	prior to treatment	Januarry 2010	2013-10-01	PC	Yes	2	CA19-9	Serum Dickkopf-1 & CA19-9	Multi-marker panel		PDAC vs Benign	140	88	52	36-84		61.7	Histologically	No	I-16, II-46,III27,IV-56	No
#294	PMID: 23546595	Identification and verification of transthyretin as a potential biomarker for pancreatic ductal adenocarcinoma	Jiong Chen	ch_jiong@126.com	China	This work was supported by Anhui Province Science and Technology Projects Foundation (No. 11010402172)	None Declared	Yes	Prospective	Serum	Prior to surgery or treatment	Januarry 2010	2013-10-01	PDAC	Yes	21	Novel	TTR "6 upregulated proteins, 15 downregulated" identified	Multi-marker panel		PDAC vs Healthy	40						Histologically	No		No		40
#294	PMID: 23546595	Identification and verification of transthyretin as a potential biomarker for pancreatic ductal adenocarcinoma	Jiong Chen	ch_jiong@126.com	China	This work was supported by Anhui Province Science and Technology Projects Foundation (No. 11010402172)	None Declared	Yes	Prospective	Serum	Prior to surgery or treatment	Januarry 2010	2013-10-01	PDAC	Yes	1	CA19-9	CA19-9	Single marker		PDAC vs Healthy	40						Histologically	No		No		40
#294	PMID: 23546595	Identification and verification of transthyretin as a potential biomarker for pancreatic ductal adenocarcinoma	Jiong Chen	ch_jiong@126.com	China	This work was supported by Anhui Province Science and Technology Projects Foundation (No. 11010402172)	None Declared	Yes	Prospective	Serum	Prior to surgery or treatment	Januarry 2010	2013-10-01	PDAC	Yes	2	CA19-9	TTR & Ca19.9	Multi-marker panel		PDAC vs Healthy	40						Histologically	No		No		40
#295	PMID: 23609192	Expression and clinical significance of apolipoprotein e in pancreatic ductal adenocarcinoma	Jiong Chen	ch_jiong@126.com	China	This work was supported by Anhui Province Science and Technology Projects Foundation (No. 11010402172).	None Declared	yes	Prospective	Serum	Prior to surgery	Januarry 2010	2013-10-01	PDAC	No	1	Novel	Apoliprotein E	Single marker	Unsure	PDAC vs Healthy	40											40
#295	PMID: 23609192	Expression and clinical significance of apolipoprotein e in pancreatic ductal adenocarcinoma	Jiong Chen	ch_jiong@126.com	China	This work was supported by Anhui Province Science and Technology Projects Foundation (No. 11010402172).	None Declared	yes	Prospective	Serum	Prior to surgery	2009-01-01	2011-03-01	PDAC	No	1	CA19-9	CA19-9	Single marker	Unsure	PDAC vs Healthy	40											40
#295	PMID: 23609192	Expression and clinical significance of apolipoprotein e in pancreatic ductal adenocarcinoma	Jiong Chen	ch_jiong@126.com	China	This work was supported by Anhui Province Science and Technology Projects Foundation (No. 11010402172).	None Declared	yes	Prospective	Serum	Prior to surgery	2009-01-01	2011-03-01	PDAC	No	Unknown	Novel	Combined	Multi-marker panel	Unsure	PDAC vs Healthy	40											40
#4267	PMID: 12193750	Prevalence of regulatory T cells is increased in peripheral blood and tumor microenvironment of patients with pancreas or breast adenocarcinoma	David C Linehan	linehand@surgery.wustl.edu	USA	This work was supported in part by National Cancer Institute K08 Grant CA87018-01 (to D.C.L.) and National Institutes of Health T32 Grant CA09621-11 (to T.J.E.).	None Declared	yes	Prospective	Whole Blood	prior to treatment, not stated on surgery	2009-01-01	2011-03-01	PDAC	No	1	Novel	CD4+25+Treg Lymphocytes	Single marker	Unstated	PDAC vs Healthy	25	12	13			66.4		No	I-1,II-6,III-14,IV-4	no		35	17	18		55.5
#465	PMID: 29189449	Preoperative Serum Thymidine Kinase Activity as Novel Monitoring, Prognostic, and Predictive Biomarker in Pancreatic Cancer	Klaus Felix	klaus.felix@med.uni-heidelberg.de	Germany	M.N., M.B., and Biovica received funding in the Horizon 2020 Program and Eurostars. T.H. was supported by BMBF grants 01GS08114 and 01ZX1305C. O.S. was supported by BMBF grant 01ZX1305C.	S.G. is the inventor of the TK1 assay by DiviTum principle and the founder of Biovica International AB, where his family members hold shares. T	Yes	Prospective	Serum	Prior to surgery			PDAC	No	1	Novel	Thymidine Kinase	Single marker	Yes	PDAC vs Healthy	343					62.3	Histologically					83
#465	PMID: 29189449	Preoperative Serum Thymidine Kinase Activity as Novel Monitoring, Prognostic, and Predictive Biomarker in Pancreatic Cancer	Klaus Felix	klaus.felix@med.uni-heidelberg.de	Germany	M.N., M.B., and Biovica received funding in the Horizon 2020 Program and Eurostars. T.H. was supported by BMBF grants 01GS08114 and 01ZX1305C. O.S. was supported by BMBF grant 01ZX1305C.	S.G. is the inventor of the TK1 assay by DiviTum principle and the founder of Biovica International AB, where his family members hold shares. T	Yes	Prospective	Serum	Prior to surgery			PDAC	No	1	CA19-9	CA19-9	Single marker	Yes	PDAC vs Healthy	343					62.3	Histologically					83
#465	PMID: 29189449	Preoperative Serum Thymidine Kinase Activity as Novel Monitoring, Prognostic, and Predictive Biomarker in Pancreatic Cancer	Klaus Felix	klaus.felix@med.uni-heidelberg.de	Germany	M.N., M.B., and Biovica received funding in the Horizon 2020 Program and Eurostars. T.H. was supported by BMBF grants 01GS08114 and 01ZX1305C. O.S. was supported by BMBF grant 01ZX1305C.	S.G. is the inventor of the TK1 assay by DiviTum principle and the founder of Biovica International AB, where his family members hold shares. T	Yes	Prospective	Serum	Prior to surgery			PDAC	No	1	Novel	CEA	Single marker	Yes	PDAC vs Healthy	343					62.3	Histologically					83
#465	PMID: 29189449	Preoperative Serum Thymidine Kinase Activity as Novel Monitoring, Prognostic, and Predictive Biomarker in Pancreatic Cancer	Klaus Felix	klaus.felix@med.uni-heidelberg.de	Germany	M.N., M.B., and Biovica received funding in the Horizon 2020 Program and Eurostars. T.H. was supported by BMBF grants 01GS08114 and 01ZX1305C. O.S. was supported by BMBF grant 01ZX1305C.	S.G. is the inventor of the TK1 assay by DiviTum principle and the founder of Biovica International AB, where his family members hold shares. T	Yes	Prospective	Serum	Prior to surgery			PDAC	No	2	CA19-9	thymidine Kinase & CA19-9	Multi-marker panel	Yes	PDAC vs Healthy	343					62.3	Histologically					83
#1912	PMID: 16636598	Significance of serum receptor-binding cancer antigen (RCAS1) in pancreatic cancer and benign pancreatobiliary diseases	Seyfettin Köklü	gskoklu@yahoo.com	Turkey	Not given	Not mentioned	Not mentioned	Prospective	Serum	Without recent treatment	2001	2011	PDAC	No	1	Novel	RCAS-1	Single marker	Testings	PDAC vs Benign	39	27	12	43-80		65	Histologically	No	I-2,II3,III14,IV20	Unclear - states no treatment in <3 months																	32	combination of groups
#1912	PMID: 16636598	Significance of serum receptor-binding cancer antigen (RCAS1) in pancreatic cancer and benign pancreatobiliary diseases	Seyfettin Köklü	gskoklu@yahoo.com	Turkey	Not given	Not mentioned	Not mentioned	Prospective	Serum	Without recent treatment	2001	2011	PDAC	No	1	CA19-9	CA19-9	Single marker		PDAC vs Benign	39	27	12	43-80		65	Histologically	No	I-2,II3,III14,IV20	Unclear - states no treatment in <3 months																	32	combination of groups
#142	PMID: 30241369	The combination of miRNA-196b, LCN2, and TIMP1 is a potential set of circulating biomarkers for screening individuals at risk for familial pancreatic cancer	Emily P Slater	slater@med.uni-marburg.de	Germany	We are thankful for the grant support of the Deutsche Krebshilfe (No. 111092) and the generous donation from the GAUFF-Foundation.	None Declared	Yes	Prospective	Serum	Prior to surgery	2001	2011	PDAC	yes	3	Novel	MiRNA-196b & LCN2 & TIMP1	Multi-marker panel	Yes	PDAC vs Healthy	50	27	23	40-84	67.5		Histologically	unclear				20	11	9	21-71		47	Volunteers
#142	PMID: 30241369	The combination of miRNA-196b, LCN2, and TIMP1 is a potential set of circulating biomarkers for screening individuals at risk for familial pancreatic cancer	Emily P Slater	slater@med.uni-marburg.de	Germany	We are thankful for the grant support of the Deutsche Krebshilfe (No. 111092) and the generous donation from the GAUFF-Foundation.	None Declared	Yes	Prospective	Serum	Prior to surgery	2001	2011	PDAC	yes	1	Novel	MiRNA-196b	Single marker	Yes	PDAC vs Healthy	50	27	23	40-84	67.5		Histologically	unclear				20	11	9	21-71		47	Volunteers
#142	PMID: 30241369	The combination of miRNA-196b, LCN2, and TIMP1 is a potential set of circulating biomarkers for screening individuals at risk for familial pancreatic cancer	Emily P Slater	slater@med.uni-marburg.de	Germany	We are thankful for the grant support of the Deutsche Krebshilfe (No. 111092) and the generous donation from the GAUFF-Foundation.	None Declared	Yes	Prospective	Serum	Prior to surgery		2004	PDAC	yes	1	Novel	LCN2	Single marker	Yes	PDAC vs Healthy	50	27	23	40-84	67.5		Histologically	unclear				20	11	9	21-71		47	Volunteers
#142	PMID: 30241369	The combination of miRNA-196b, LCN2, and TIMP1 is a potential set of circulating biomarkers for screening individuals at risk for familial pancreatic cancer	Emily P Slater	slater@med.uni-marburg.de	Germany	We are thankful for the grant support of the Deutsche Krebshilfe (No. 111092) and the generous donation from the GAUFF-Foundation.	None Declared	Yes	Prospective	Serum	Prior to surgery		2004	PDAC	yes	1	Novel	TIMP1	Single marker	Yes	PDAC vs Healthy	50	27	23	40-84	67.5		Histologically	unclear				20	11	9	21-71		47	Volunteers
#142	PMID: 30241369	The combination of miRNA-196b, LCN2, and TIMP1 is a potential set of circulating biomarkers for screening individuals at risk for familial pancreatic cancer	Emily P Slater	slater@med.uni-marburg.de	Germany	We are thankful for the grant support of the Deutsche Krebshilfe (No. 111092) and the generous donation from the GAUFF-Foundation.	None Declared	Yes	Prospective	Serum	Prior to surgery			PDAC	yes	1	Novel	RNU2-1f	Single marker	Yes	PDAC vs Healthy	50	27	23	40-84	67.5		Histologically	unclear				20	11	9	21-71		47	Volunteers
#142	PMID: 30241369	The combination of miRNA-196b, LCN2, and TIMP1 is a potential set of circulating biomarkers for screening individuals at risk for familial pancreatic cancer	Emily P Slater	slater@med.uni-marburg.de	Germany	We are thankful for the grant support of the Deutsche Krebshilfe (No. 111092) and the generous donation from the GAUFF-Foundation.	None Declared	Yes	Prospective	Serum	Prior to surgery			PDAC	yes	1	Novel	Glypican-1	Single marker	Yes	PDAC vs Healthy	50	27	23	40-84	67.5		Histologically	unclear				20	11	9	21-71		47	Volunteers
#142	PMID: 30241369	The combination of miRNA-196b, LCN2, and TIMP1 is a potential set of circulating biomarkers for screening individuals at risk for familial pancreatic cancer	Emily P Slater	slater@med.uni-marburg.de	Germany	We are thankful for the grant support of the Deutsche Krebshilfe (No. 111092) and the generous donation from the GAUFF-Foundation.	None Declared	Yes	Prospective	Serum	Prior to surgery			PDAC	yes	3	Novel	MiRNA-196b & LCN2 & TIMP1	Multi-marker panel	Yes	PDAC vs Benign	50	27	23	40-84	67.5		Histologically	unclear																			10	Chronic Pancreatitis
#142	PMID: 30241369	The combination of miRNA-196b, LCN2, and TIMP1 is a potential set of circulating biomarkers for screening individuals at risk for familial pancreatic cancer	Emily P Slater	slater@med.uni-marburg.de	Germany	We are thankful for the grant support of the Deutsche Krebshilfe (No. 111092) and the generous donation from the GAUFF-Foundation.	None Declared	Yes	Prospective	Serum	Prior to surgery			PDAC	yes	1	Novel	MiRNA-196b	Single marker	Yes	PDAC vs Benign	50	27	23	40-84	67.5		Histologically	unclear																			10	Chronic Pancreatitis
#142	PMID: 30241369	The combination of miRNA-196b, LCN2, and TIMP1 is a potential set of circulating biomarkers for screening individuals at risk for familial pancreatic cancer	Emily P Slater	slater@med.uni-marburg.de	Germany	We are thankful for the grant support of the Deutsche Krebshilfe (No. 111092) and the generous donation from the GAUFF-Foundation.	None Declared	Yes	Prospective	Serum	Prior to surgery			PDAC	yes	1	Novel	LCN2	Single marker	Yes	PDAC vs Benign	50	27	23	40-84	67.5		Histologically	unclear																			10	Chronic Pancreatitis
#142	PMID: 30241369	The combination of miRNA-196b, LCN2, and TIMP1 is a potential set of circulating biomarkers for screening individuals at risk for familial pancreatic cancer	Emily P Slater	slater@med.uni-marburg.de	Germany	We are thankful for the grant support of the Deutsche Krebshilfe (No. 111092) and the generous donation from the GAUFF-Foundation.	None Declared	Yes	Prospective	Serum	Prior to surgery			PDAC	yes	1	Novel	TIMP1	Single marker	Yes	PDAC vs Benign	50	27	23	40-84	67.5		Histologically	unclear																			10	Chronic Pancreatitis
#142	PMID: 30241369	The combination of miRNA-196b, LCN2, and TIMP1 is a potential set of circulating biomarkers for screening individuals at risk for familial pancreatic cancer	Emily P Slater	slater@med.uni-marburg.de	Germany	We are thankful for the grant support of the Deutsche Krebshilfe (No. 111092) and the generous donation from the GAUFF-Foundation.	None Declared	Yes	Prospective	Serum	Prior to surgery			PDAC	yes	1	Novel	RNU2-1f	Single marker	Yes	PDAC vs Benign	50	27	23	40-84	67.5		Histologically	unclear																			10	Chronic Pancreatitis
#142	PMID: 30241369	The combination of miRNA-196b, LCN2, and TIMP1 is a potential set of circulating biomarkers for screening individuals at risk for familial pancreatic cancer	Emily P Slater	slater@med.uni-marburg.de	Germany	We are thankful for the grant support of the Deutsche Krebshilfe (No. 111092) and the generous donation from the GAUFF-Foundation.	None Declared	Yes	Prospective	Serum	Prior to surgery			PDAC	yes	1	Novel	Glypican-1	Single marker	Yes	PDAC vs Benign	50	27	23	40-84	67.5		Histologically	unclear																			10	Chronic Pancreatitis
#8511	PMID: 24849506	Selected Cytokines in Patients with Pancreatic Cancer: A Preliminary Report	Wojciech Błogowski	rannab@wp.pl	Poland	a grant awarded by the Polish Ministry of Science and Higher Education (402 423038). The funders had no role in study design, data collection and analysis, decision to publish, or preparation of the manuscript.	None Declared	Yes	Prospective	Plasma	Prior to cyst puncture by Surgery			PDAC	yes	5	Novel	IL-6 & IL-8 & IL-10 & IL-23 & TNFa	Multi-marker panel		PDAC vs Healthy	43	17	26			61	Histologically	Unclear		No		41	15	26			60	Volunteers
#8511	PMID: 24849506	Selected Cytokines in Patients with Pancreatic Cancer: A Preliminary Report	Wojciech Błogowski	rannab@wp.pl	Poland	a grant awarded by the Polish Ministry of Science and Higher Education (402 423038). The funders had no role in study design, data collection and analysis, decision to publish, or preparation of the manuscript.	None Declared	Yes	Prospective	Plasma	Prior to cyst puncture by Surgery			PDAC	yes	1	Novel	IL-6	Single marker		PDAC vs Healthy	43	17	26			61	Histologically	Unclear		No		41	15	26			60	Volunteers
#8511	PMID: 24849506	Selected Cytokines in Patients with Pancreatic Cancer: A Preliminary Report	Wojciech Błogowski	rannab@wp.pl	Poland	a grant awarded by the Polish Ministry of Science and Higher Education (402 423038). The funders had no role in study design, data collection and analysis, decision to publish, or preparation of the manuscript.	None Declared	Yes	Prospective	Plasma	Prior to cyst puncture by Surgery			PDAC	yes	1	Novel	IL-8	Single marker		PDAC vs Healthy	43	17	26			61	Histologically	Unclear		No		41	15	26			60	Volunteers
#8511	PMID: 24849506	Selected Cytokines in Patients with Pancreatic Cancer: A Preliminary Report	Wojciech Błogowski	rannab@wp.pl	Poland	a grant awarded by the Polish Ministry of Science and Higher Education (402 423038). The funders had no role in study design, data collection and analysis, decision to publish, or preparation of the manuscript.	None Declared	Yes	Prospective	Plasma	Prior to cyst puncture by Surgery			PDAC	yes	1	Novel	IL-10	Single marker		PDAC vs Healthy	43	17	26			61	Histologically	Unclear		No		41	15	26			60	Volunteers
#8511	PMID: 24849506	Selected Cytokines in Patients with Pancreatic Cancer: A Preliminary Report	Wojciech Błogowski	rannab@wp.pl	Poland	a grant awarded by the Polish Ministry of Science and Higher Education (402 423038). The funders had no role in study design, data collection and analysis, decision to publish, or preparation of the manuscript.	None Declared	Yes	Prospective	Plasma	Prior to cyst puncture by Surgery			PDAC	yes	1	Novel	IL-23	Single marker		PDAC vs Healthy	43	17	26			61	Histologically	Unclear		No		41	15	26			60	Volunteers
#8511	PMID: 24849506	Selected Cytokines in Patients with Pancreatic Cancer: A Preliminary Report	Wojciech Błogowski	rannab@wp.pl	Poland	a grant awarded by the Polish Ministry of Science and Higher Education (402 423038). The funders had no role in study design, data collection and analysis, decision to publish, or preparation of the manuscript.	None Declared	Yes	Prospective	Plasma	Prior to cyst puncture by Surgery			PDAC	yes	1	Novel	TNF	Single marker		PDAC vs Healthy	43	17	26			61	Histologically	Unclear		No		41	15	26			60	Volunteers
#8511	PMID: 24849506	Selected Cytokines in Patients with Pancreatic Cancer: A Preliminary Report	Wojciech Błogowski	rannab@wp.pl	Poland	a grant awarded by the Polish Ministry of Science and Higher Education (402 423038). The funders had no role in study design, data collection and analysis, decision to publish, or preparation of the manuscript.	None Declared	Yes	Prospective	Plasma	Prior to cyst puncture by Surgery			PDAC	yes	1	CA19-9	CA19-9	Single marker		PDAC vs Healthy	43	17	26			61	Histologically	Unclear		No		41	15	26			60	Volunteers
#5360	PMID: 22941199	Evaluation of serum diagnosis of pancreatic cancer by using surface-enhanced laser desorption/ionization time-of-flight mass spectrometry	XIAOHANG ZHAO	xhzdoctor@yahoo.cn	China	This study was supported by the National Natural Science Foundation of China (nos. 30572126 and 30721001), the High-Tech R&D Program of China (nos. 2006AA02Z19B, 2006AA02Z341 and 2006AA02A403) and the National Basic Research Program of China (no. 2004CB518707).	Not mentioned	yes	prospective	serum	No details given			PC	Yes	1	Novel	7775	Single marker	Yes	PDAC vs Healthy	30	18	12	42-75			Histologically or cytologically	No	I-0,II10, III13, IV7	No		39	23	16	25-77			Volunteers
#5360	PMID: 22941199	Evaluation of serum diagnosis of pancreatic cancer by using surface-enhanced laser desorption/ionization time-of-flight mass spectrometry	XIAOHANG ZHAO	xhzdoctor@yahoo.cn	China	This study was supported by the National Natural Science Foundation of China (nos. 30572126 and 30721001), the High-Tech R&D Program of China (nos. 2006AA02Z19B, 2006AA02Z341 and 2006AA02A403) and the National Basic Research Program of China (no. 2004CB518707).	Not mentioned	yes	prospective	serum	No details given			PC	Yes	1	Novel	8567	Single marker	Yes	PDAC vs Healthy	30	18	12	42-75			Histologically or cytologically	No	I-0,II10, III13, IV7	No		39	23	16	25-77			Volunteers
#5360	PMID: 22941199	Evaluation of serum diagnosis of pancreatic cancer by using surface-enhanced laser desorption/ionization time-of-flight mass spectrometry	XIAOHANG ZHAO	xhzdoctor@yahoo.cn	China	This study was supported by the National Natural Science Foundation of China (nos. 30572126 and 30721001), the High-Tech R&D Program of China (nos. 2006AA02Z19B, 2006AA02Z341 and 2006AA02A403) and the National Basic Research Program of China (no. 2004CB518707).	Not mentioned	yes	prospective	serum	No details given			PC	Yes	1	Novel	5362	Single marker	Yes	PDAC vs Healthy	30	18	12	42-75			Histologically or cytologically	No	I-0,II10, III13, IV7	No		39	23	16	25-77			Volunteers
#5360	PMID: 22941199	Evaluation of serum diagnosis of pancreatic cancer by using surface-enhanced laser desorption/ionization time-of-flight mass spectrometry	XIAOHANG ZHAO	xhzdoctor@yahoo.cn	China	This study was supported by the National Natural Science Foundation of China (nos. 30572126 and 30721001), the High-Tech R&D Program of China (nos. 2006AA02Z19B, 2006AA02Z341 and 2006AA02A403) and the National Basic Research Program of China (no. 2004CB518707).	Not mentioned	yes	prospective	serum	No details given			PC	Yes	1	Novel	5344	Single marker	Yes	PDAC vs Healthy	30	18	12	42-75			Histologically or cytologically	No	I-0,II10, III13, IV7	No		39	23	16	25-77			Volunteers
#5360	PMID: 22941199	Evaluation of serum diagnosis of pancreatic cancer by using surface-enhanced laser desorption/ionization time-of-flight mass spectrometry	XIAOHANG ZHAO	xhzdoctor@yahoo.cn	China	This study was supported by the National Natural Science Foundation of China (nos. 30572126 and 30721001), the High-Tech R&D Program of China (nos. 2006AA02Z19B, 2006AA02Z341 and 2006AA02A403) and the National Basic Research Program of China (no. 2004CB518707).	Not mentioned	yes	prospective	serum	No details given			PC	Yes	1	Novel	4390	Single marker	Yes	PDAC vs Healthy	30	18	12	42-75			Histologically or cytologically	No	I-0,II10, III13, IV7	No		39	23	16	25-77			Volunteers
#5360	PMID: 22941199	Evaluation of serum diagnosis of pancreatic cancer by using surface-enhanced laser desorption/ionization time-of-flight mass spectrometry	XIAOHANG ZHAO	xhzdoctor@yahoo.cn	China	This study was supported by the National Natural Science Foundation of China (nos. 30572126 and 30721001), the High-Tech R&D Program of China (nos. 2006AA02Z19B, 2006AA02Z341 and 2006AA02A403) and the National Basic Research Program of China (no. 2004CB518707).	Not mentioned	yes	prospective	serum	No details given			PC	Yes	1	Novel	8773	Single marker	Yes	PDAC vs Healthy	30	18	12	42-75			Histologically or cytologically	No	I-0,II10, III13, IV7	No		39	23	16	25-77			Volunteers
#5360	PMID: 22941199	Evaluation of serum diagnosis of pancreatic cancer by using surface-enhanced laser desorption/ionization time-of-flight mass spectrometry	XIAOHANG ZHAO	xhzdoctor@yahoo.cn	China	This study was supported by the National Natural Science Foundation of China (nos. 30572126 and 30721001), the High-Tech R&D Program of China (nos. 2006AA02Z19B, 2006AA02Z341 and 2006AA02A403) and the National Basic Research Program of China (no. 2004CB518707).	Not mentioned	yes	prospective	serum	No details given			PC	Yes	1	Novel	4141	Single marker	Yes	PDAC vs Healthy	30	18	12	42-75			Histologically or cytologically	No	I-0,II10, III13, IV7	No		39	23	16	25-77			Volunteers
#5360	PMID: 22941199	Evaluation of serum diagnosis of pancreatic cancer by using surface-enhanced laser desorption/ionization time-of-flight mass spectrometry	XIAOHANG ZHAO	xhzdoctor@yahoo.cn	China	This study was supported by the National Natural Science Foundation of China (nos. 30572126 and 30721001), the High-Tech R&D Program of China (nos. 2006AA02Z19B, 2006AA02Z341 and 2006AA02A403) and the National Basic Research Program of China (no. 2004CB518707).	Not mentioned	yes	prospective	serum	No details given			PC	Yes	1	Novel	4080	Single marker	Yes	PDAC vs Healthy	30	18	12	42-75			Histologically or cytologically	No	I-0,II10, III13, IV7	No		39	23	16	25-77			Volunteers
#5360	PMID: 22941199	Evaluation of serum diagnosis of pancreatic cancer by using surface-enhanced laser desorption/ionization time-of-flight mass spectrometry	XIAOHANG ZHAO	xhzdoctor@yahoo.cn	China	This study was supported by the National Natural Science Foundation of China (nos. 30572126 and 30721001), the High-Tech R&D Program of China (nos. 2006AA02Z19B, 2006AA02Z341 and 2006AA02A403) and the National Basic Research Program of China (no. 2004CB518707).	Not mentioned	yes	prospective	serum	No details given			PC	Yes	1	Novel	4289	Single marker	Yes	PDAC vs Healthy	30	18	12	42-75			Histologically or cytologically	No	I-0,II10, III13, IV7	No		39	23	16	25-77			Volunteers
#5360	PMID: 22941199	Evaluation of serum diagnosis of pancreatic cancer by using surface-enhanced laser desorption/ionization time-of-flight mass spectrometry	XIAOHANG ZHAO	xhzdoctor@yahoo.cn	China	This study was supported by the National Natural Science Foundation of China (nos. 30572126 and 30721001), the High-Tech R&D Program of China (nos. 2006AA02Z19B, 2006AA02Z341 and 2006AA02A403) and the National Basic Research Program of China (no. 2004CB518707).	Not mentioned	yes	prospective	serum	No details given			PC	Yes	1	Novel	8661	Single marker	Yes	PDAC vs Healthy	30	18	12	42-75			Histologically or cytologically	No	I-0,II10, III13, IV7	No		39	23	16	25-77			Volunteers
#5360	PMID: 22941199	Evaluation of serum diagnosis of pancreatic cancer by using surface-enhanced laser desorption/ionization time-of-flight mass spectrometry	XIAOHANG ZHAO	xhzdoctor@yahoo.cn	China	This study was supported by the National Natural Science Foundation of China (nos. 30572126 and 30721001), the High-Tech R&D Program of China (nos. 2006AA02Z19B, 2006AA02Z341 and 2006AA02A403) and the National Basic Research Program of China (no. 2004CB518707).	Not mentioned	yes	prospective	serum	No details given			PC	Yes	4	Novel	7775 & 8567 & 5362 & 5344 Da	Multi-marker panel	Yes	PDAC vs Healthy	30	18	12	42-76			Histologically or cytologically	No	I-0,II10, III13, IV8	No		39	23	16	25-78			Volunteers
#5360	PMID: 22941199	Evaluation of serum diagnosis of pancreatic cancer by using surface-enhanced laser desorption/ionization time-of-flight mass spectrometry	XIAOHANG ZHAO	xhzdoctor@yahoo.cn	China	This study was supported by the National Natural Science Foundation of China (nos. 30572126 and 30721001), the High-Tech R&D Program of China (nos. 2006AA02Z19B, 2006AA02Z341 and 2006AA02A403) and the National Basic Research Program of China (no. 2004CB518707).	Not mentioned	yes	prospective	serum	No details given			PC	Yes	4	Novel	7775 & 8567 & 5362 & 5344 Da	Multi-marker panel	Yes	PDAC vs Healthy	102	65	37	25-85			Histologically or cytologically	No	I-28,II22, III33, IV19	No		28	13	15	26-57			Volunteers
#5360	PMID: 22941199	Evaluation of serum diagnosis of pancreatic cancer by using surface-enhanced laser desorption/ionization time-of-flight mass spectrometry	XIAOHANG ZHAO	xhzdoctor@yahoo.cn	China	This study was supported by the National Natural Science Foundation of China (nos. 30572126 and 30721001), the High-Tech R&D Program of China (nos. 2006AA02Z19B, 2006AA02Z341 and 2006AA02A403) and the National Basic Research Program of China (no. 2004CB518707).	Not mentioned	yes	prospective	serum	No details given			PC	Yes	1	CA19-9	CA19-9	Single marker	Yes	PDAC vs Healthy	102	65	37	25-85			Histologically or cytologically	No	I-28,II22, III33, IV19	No		28	13	15	26-57			Volunteers
#1394	PMID: 21455317	Leukocyte DNA methylation signature differentiates pancreatic cancer patients from healthy controls	Liang Wang	wang.liang@mayo.edu	USA	Mayo Clinic SPORE in Pancreatic Cancer (P50 CA102701) and the Department of Laboratory Medicine and Pathology, Mayo Clinic.	None Declared	Yes	Prospective	Whole Blood	Prior to start of treatment			PDAC	Yes	5	Novel	IL10_P348 & LCN2_P86 & ZAP70_P220 & AIM2_P624 & TAL1_P817	Multi-marker panel	Unclear	PDAC vs Healthy	173	85	88				Histologically	No	58 Resectable, 59 Locally Advanced, 34 metastatic	no		215	107	108				n
#1394	PMID: 21455317	Leukocyte DNA methylation signature differentiates pancreatic cancer patients from healthy controls	Liang Wang	wang.liang@mayo.edu	USA	Mayo Clinic SPORE in Pancreatic Cancer (P50 CA102701) and the Department of Laboratory Medicine and Pathology, Mayo Clinic.	None Declared	Yes	Prospective	Whole Blood	Prior to start of treatment			PDAC	Yes	6	Novel	IL10_P348 & LCN2_P86 & ZAP70_P220 & AIM2_P624 & TAL1_P817 & covariates	Multi-marker panel	Unclear	PDAC vs Healthy	173	85	88				Histologically	No	58 Resectable, 59 Locally Advanced, 34 metastatic	no		215	107	108				n
#1394	PMID: 21455317	Leukocyte DNA methylation signature differentiates pancreatic cancer patients from healthy controls	Liang Wang	wang.liang@mayo.edu	USA	Mayo Clinic SPORE in Pancreatic Cancer (P50 CA102701) and the Department of Laboratory Medicine and Pathology, Mayo Clinic.	None Declared	Yes	Prospective	Whole Blood	Prior to start of treatment			PDAC	Yes	7	Novel	IL10_P348 & LCN2_P86 & ZAP70_P220 & AIM2_P624 & TAL1_P817 & Covariates & ABO	Multi-marker panel	Unclear	PDAC vs Healthy	173	85	88				Histologically	No	58 Resectable, 59 Locally Advanced, 34 metastatic	no		215	107	108				n
#1394	PMID: 21455317	Leukocyte DNA methylation signature differentiates pancreatic cancer patients from healthy controls	Liang Wang	wang.liang@mayo.edu	USA	Mayo Clinic SPORE in Pancreatic Cancer (P50 CA102701) and the Department of Laboratory Medicine and Pathology, Mayo Clinic.	None Declared	Yes	Prospective	Whole Blood	Prior to start of treatment			PDAC	Yes	5	Novel	IL10_P348 & LCN2_P86 & ZAP70_P220 & AIM2_P624 & TAL1_P817	Multi-marker panel	Unclear	PDAC vs Healthy	173	85	88				Histologically	No	58 Resectable, 59 Locally Advanced, 34 metastatic	no		215	107	108				n
#1394	PMID: 21455317	Leukocyte DNA methylation signature differentiates pancreatic cancer patients from healthy controls	Liang Wang	wang.liang@mayo.edu	USA	Mayo Clinic SPORE in Pancreatic Cancer (P50 CA102701) and the Department of Laboratory Medicine and Pathology, Mayo Clinic.	None Declared	Yes	Prospective	Whole Blood	Prior to start of treatment	2000-10-01	2006-06-01	PDAC	Yes	6	Novel	IL10_P348 & LCN2_P86 & ZAP70_P220 & AIM2_P624 & TAL1_P817 & covariates	Multi-marker panel	Unclear	PDAC vs Healthy	173	85	88				Histologically	No	58 Resectable, 59 Locally Advanced, 34 metastatic	no		215	107	108				n
#1394	PMID: 21455317	Leukocyte DNA methylation signature differentiates pancreatic cancer patients from healthy controls	Liang Wang	wang.liang@mayo.edu	USA	Mayo Clinic SPORE in Pancreatic Cancer (P50 CA102701) and the Department of Laboratory Medicine and Pathology, Mayo Clinic.	None Declared	Yes	Prospective	Whole Blood	Prior to start of treatment	2000-10-01	2006-06-01	PDAC	Yes	7	Novel	IL10_P348 & LCN2_P86 & ZAP70_P220 & AIM2_P624 & TAL1_P817 & Covariates & ABO	Multi-marker panel	Unclear	PDAC vs Healthy	173	85	88				Histologically	No	58 Resectable, 59 Locally Advanced, 34 metastatic	no		215	107	108				n
#1394	PMID: 21455317	Leukocyte DNA methylation signature differentiates pancreatic cancer patients from healthy controls	Liang Wang	wang.liang@mayo.edu	USA	Mayo Clinic SPORE in Pancreatic Cancer (P50 CA102701) and the Department of Laboratory Medicine and Pathology, Mayo Clinic.	None Declared	Yes	Prospective	Whole Blood	Prior to start of treatment	2000-10-01	2006-06-01	PDAC	Yes	5	Novel	IL10_P348 & LCN2_P86 & ZAP70_P220 & AIM2_P624 & TAL1_P817	Multi-marker panel	Unclear	PDAC vs Healthy	119	59	60				Histologically	No	31 resectable, 45 locally advance, 43 metastatic	no		60	29	31				n
#1394	PMID: 21455317	Leukocyte DNA methylation signature differentiates pancreatic cancer patients from healthy controls	Liang Wang	wang.liang@mayo.edu	USA	Mayo Clinic SPORE in Pancreatic Cancer (P50 CA102701) and the Department of Laboratory Medicine and Pathology, Mayo Clinic.	None Declared	Yes	Prospective	Whole Blood	Prior to start of treatment	2000-10-01	2006-06-01	PDAC	Yes	6	Novel	IL10_P348 & LCN2_P86 & ZAP70_P220 & AIM2_P624 & TAL1_P817 & covariates	Multi-marker panel	Unclear	PDAC vs Healthy	119	59	60				Histologically	No	31 resectable, 45 locally advance, 43 metastatic	no		60	29	31				n
#1394	PMID: 21455317	Leukocyte DNA methylation signature differentiates pancreatic cancer patients from healthy controls	Liang Wang	wang.liang@mayo.edu	USA	Mayo Clinic SPORE in Pancreatic Cancer (P50 CA102701) and the Department of Laboratory Medicine and Pathology, Mayo Clinic.	None Declared	Yes	Prospective	Whole Blood	Prior to start of treatment	2000-10-01	2006-06-01	PDAC	Yes	7	Novel	IL10_P348 & LCN2_P86 & ZAP70_P220 & AIM2_P624 & TAL1_P817 & Covariates & ABO	Multi-marker panel	Unclear	PDAC vs Healthy	119	59	60				Histologically	No	31 resectable, 45 locally advance, 43 metastatic	no		60	29	31				n
#1394	PMID: 21455317	Leukocyte DNA methylation signature differentiates pancreatic cancer patients from healthy controls	Liang Wang	wang.liang@mayo.edu	USA	Mayo Clinic SPORE in Pancreatic Cancer (P50 CA102701) and the Department of Laboratory Medicine and Pathology, Mayo Clinic.	None Declared	Yes	Prospective	Whole Blood	Prior to start of treatment	2000-10-01	2006-06-01	PDAC	Yes	5	Novel	IL10_P348 & LCN2_P86 & ZAP70_P220 & AIM2_P624 & TAL1_P818	Multi-marker panel	Unclear	PDAC vs Healthy	58								58 Resectable,	no		215	107	108				n
#1394	PMID: 21455317	Leukocyte DNA methylation signature differentiates pancreatic cancer patients from healthy controls	Liang Wang	wang.liang@mayo.edu	USA	Mayo Clinic SPORE in Pancreatic Cancer (P50 CA102701) and the Department of Laboratory Medicine and Pathology, Mayo Clinic.	None Declared	Yes	Prospective	Whole Blood	Prior to start of treatment	2000-10-01	2006-06-01	PDAC	Yes	6	Novel	IL10_P348 & LCN2_P86 & ZAP70_P220 & AIM2_P624 & TAL1_P818 & covariates	Multi-marker panel	Unclear	PDAC vs Healthy	58								58 Resectable,	no		215	107	108				n
#1394	PMID: 21455317	Leukocyte DNA methylation signature differentiates pancreatic cancer patients from healthy controls	Liang Wang	wang.liang@mayo.edu	USA	Mayo Clinic SPORE in Pancreatic Cancer (P50 CA102701) and the Department of Laboratory Medicine and Pathology, Mayo Clinic.	None Declared	Yes	Prospective	Whole Blood	Prior to start of treatment	2000-10-01	2006-06-01	PDAC	Yes	7	Novel	IL10_P348 & LCN2_P86 & ZAP70_P220 & AIM2_P624 & TAL1_P818 & covariates & ABO	Multi-marker panel	Unclear	PDAC vs Healthy	58								58 Resectable,	no		215	107	108				n
#1394	PMID: 21455317	Leukocyte DNA methylation signature differentiates pancreatic cancer patients from healthy controls	Liang Wang	wang.liang@mayo.edu	USA	Mayo Clinic SPORE in Pancreatic Cancer (P50 CA102701) and the Department of Laboratory Medicine and Pathology, Mayo Clinic.	None Declared	Yes	Prospective	Whole Blood	Prior to start of treatment	2000-10-01	2006-06-01	PDAC	Yes	5	Novel	IL10_P348 & LCN2_P86 & ZAP70_P220 & AIM2_P624 & TAL1_P818	Multi-marker panel	Unclear	PDAC vs Healthy	58								58 Resectable,	no		215	107	108				n
#1394	PMID: 21455317	Leukocyte DNA methylation signature differentiates pancreatic cancer patients from healthy controls	Liang Wang	wang.liang@mayo.edu	USA	Mayo Clinic SPORE in Pancreatic Cancer (P50 CA102701) and the Department of Laboratory Medicine and Pathology, Mayo Clinic.	None Declared	Yes	Prospective	Whole Blood	Prior to start of treatment	2000-10-01	2006-06-01	PDAC	Yes	6	Novel	IL10_P348 & LCN2_P86 & ZAP70_P220 & AIM2_P624 & TAL1_P818 & covariates	Multi-marker panel	Unclear	PDAC vs Healthy	58								58 Resectable,	no		215	107	108				n
#1394	PMID: 21455317	Leukocyte DNA methylation signature differentiates pancreatic cancer patients from healthy controls	Liang Wang	wang.liang@mayo.edu	USA	Mayo Clinic SPORE in Pancreatic Cancer (P50 CA102701) and the Department of Laboratory Medicine and Pathology, Mayo Clinic.	None Declared	Yes	Prospective	Whole Blood	Prior to start of treatment	2000-10-01	2006-06-01	PDAC	Yes	7	Novel	IL10_P348 & LCN2_P86 & ZAP70_P220 & AIM2_P624 & TAL1_P818 & covariates & ABO	Multi-marker panel	Unclear	PDAC vs Healthy	58								58 Resectable,	no		215	107	108				n
#1394	PMID: 21455317	Leukocyte DNA methylation signature differentiates pancreatic cancer patients from healthy controls	Liang Wang	wang.liang@mayo.edu	USA	Mayo Clinic SPORE in Pancreatic Cancer (P50 CA102701) and the Department of Laboratory Medicine and Pathology, Mayo Clinic.	None Declared	Yes	Prospective	Whole Blood	Prior to start of treatment	2000-10-01	2006-06-01	PDAC	Yes	5	Novel	IL10_P348 & LCN2_P86 & ZAP70_P220 & AIM2_P624 & TAL1_P818	Multi-marker panel	Unclear	PDAC vs Healthy	31								31 resectable	no		60	29	31				n
#1394	PMID: 21455317	Leukocyte DNA methylation signature differentiates pancreatic cancer patients from healthy controls	Liang Wang	wang.liang@mayo.edu	USA	Mayo Clinic SPORE in Pancreatic Cancer (P50 CA102701) and the Department of Laboratory Medicine and Pathology, Mayo Clinic.	None Declared	Yes	Prospective	Whole Blood	Prior to start of treatment	2000-10-01	2006-06-01	PDAC	Yes	6	Novel	IL10_P348 & LCN2_P86 & ZAP70_P220 & AIM2_P624 & TAL1_P818 & covariates	Multi-marker panel	Unclear	PDAC vs Healthy	31								31 resectable	no		60	29	31				n
#1394	PMID: 21455317	Leukocyte DNA methylation signature differentiates pancreatic cancer patients from healthy controls	Liang Wang	wang.liang@mayo.edu	USA	Mayo Clinic SPORE in Pancreatic Cancer (P50 CA102701) and the Department of Laboratory Medicine and Pathology, Mayo Clinic.	None Declared	Yes	Prospective	Whole Blood	Prior to start of treatment	2000-10-01	2006-06-01	PDAC	Yes	7	Novel	IL10_P348 & LCN2_P86 & ZAP70_P220 & AIM2_P624 & TAL1_P818 & covariates & ABO	Multi-marker panel	Unclear	PDAC vs Healthy	31								31 resectable	no		60	29	31				n
#1394	PMID: 21455317	Leukocyte DNA methylation signature differentiates pancreatic cancer patients from healthy controls	Liang Wang	wang.liang@mayo.edu	USA	Mayo Clinic SPORE in Pancreatic Cancer (P50 CA102701) and the Department of Laboratory Medicine and Pathology, Mayo Clinic.	None Declared	Yes	Prospective	Whole Blood	Prior to start of treatment	2000-10-01	2006-06-01	PDAC	Yes	1	Novel	ITK_P114_F	Single marker		PDAC vs Healthy	119	59	60				Histologically	No	31 resectable, 45 locally advance, 43 metastatic	no		60	29	31				n
#1394	PMID: 21455317	Leukocyte DNA methylation signature differentiates pancreatic cancer patients from healthy controls	Liang Wang	wang.liang@mayo.edu	USA	Mayo Clinic SPORE in Pancreatic Cancer (P50 CA102701) and the Department of Laboratory Medicine and Pathology, Mayo Clinic.	None Declared	Yes	Prospective	Whole Blood	Prior to start of treatment	2000-10-01	2006-06-01	PDAC	Yes	1	Novel	LCN2_P86_ R	Single marker		PDAC vs Healthy	119	59	60				Histologically	No	31 resectable, 45 locally advance, 43 metastatic	no		60	29	31				n
#1394	PMID: 21455317	Leukocyte DNA methylation signature differentiates pancreatic cancer patients from healthy controls	Liang Wang	wang.liang@mayo.edu	USA	Mayo Clinic SPORE in Pancreatic Cancer (P50 CA102701) and the Department of Laboratory Medicine and Pathology, Mayo Clinic.	None Declared	Yes	Prospective	Whole Blood	Prior to start of treatment	2000-10-01	2006-06-01	PDAC	Yes	1	Novel	ITK_E166_R	Single marker		PDAC vs Healthy	119	59	60				Histologically	No	31 resectable, 45 locally advance, 43 metastatic	no		60	29	31				n
#1394	PMID: 21455317	Leukocyte DNA methylation signature differentiates pancreatic cancer patients from healthy controls	Liang Wang	wang.liang@mayo.edu	USA	Mayo Clinic SPORE in Pancreatic Cancer (P50 CA102701) and the Department of Laboratory Medicine and Pathology, Mayo Clinic.	None Declared	Yes	Prospective	Whole Blood	Prior to start of treatment	2000-10-01	2006-06-01	PDAC	Yes	1	Novel	PECAM1_E32_R	Single marker		PDAC vs Healthy	119	59	60				Histologically	No	31 resectable, 45 locally advance, 43 metastatic	no		60	29	31				n
#1394	PMID: 21455317	Leukocyte DNA methylation signature differentiates pancreatic cancer patients from healthy controls	Liang Wang	wang.liang@mayo.edu	USA	Mayo Clinic SPORE in Pancreatic Cancer (P50 CA102701) and the Department of Laboratory Medicine and Pathology, Mayo Clinic.	None Declared	Yes	Prospective	Whole Blood	Prior to start of treatment	2000-10-01	2006-06-01	PDAC	Yes	1	Novel	LMO2_E148_F	Single marker		PDAC vs Healthy	119	59	60				Histologically	No	31 resectable, 45 locally advance, 43 metastatic	no		60	29	31				n
#1394	PMID: 21455317	Leukocyte DNA methylation signature differentiates pancreatic cancer patients from healthy controls	Liang Wang	wang.liang@mayo.edu	USA	Mayo Clinic SPORE in Pancreatic Cancer (P50 CA102701) and the Department of Laboratory Medicine and Pathology, Mayo Clinic.	None Declared	Yes	Prospective	Whole Blood	Prior to start of treatment	2000-10-01	2006-06-01	PDAC	Yes	1	Novel	IL10_P348_F	Single marker		PDAC vs Healthy	119	59	60				Histologically	No	31 resectable, 45 locally advance, 43 metastatic	no		60	29	31				n
#1394	PMID: 21455317	Leukocyte DNA methylation signature differentiates pancreatic cancer patients from healthy controls	Liang Wang	wang.liang@mayo.edu	USA	Mayo Clinic SPORE in Pancreatic Cancer (P50 CA102701) and the Department of Laboratory Medicine and Pathology, Mayo Clinic.	None Declared	Yes	Prospective	Whole Blood	Prior to start of treatment	2000-10-01	2006-06-01	PDAC	Yes	1	Novel	LCK_E28_F	Single marker		PDAC vs Healthy	119	59	60				Histologically	No	31 resectable, 45 locally advance, 43 metastatic	no		60	29	31				n
#1394	PMID: 21455317	Leukocyte DNA methylation signature differentiates pancreatic cancer patients from healthy controls	Liang Wang	wang.liang@mayo.edu	USA	Mayo Clinic SPORE in Pancreatic Cancer (P50 CA102701) and the Department of Laboratory Medicine and Pathology, Mayo Clinic.	None Declared	Yes	Prospective	Whole Blood	Prior to start of treatment	2000-10-01	2006-06-01	PDAC	Yes	1	Novel	RUNX3_P247_F	Single marker		PDAC vs Healthy	119	59	60				Histologically	No	31 resectable, 45 locally advance, 43 metastatic	no		60	29	31				n
#1394	PMID: 21455317	Leukocyte DNA methylation signature differentiates pancreatic cancer patients from healthy controls	Liang Wang	wang.liang@mayo.edu	USA	Mayo Clinic SPORE in Pancreatic Cancer (P50 CA102701) and the Department of Laboratory Medicine and Pathology, Mayo Clinic.	None Declared	Yes	Prospective	Whole Blood	Prior to start of treatment	2000-10-01	2006-06-01	PDAC	Yes	1	Novel	LMO2_P794_R	Single marker		PDAC vs Healthy	119	59	60				Histologically	No	31 resectable, 45 locally advance, 43 metastatic	no		60	29	31				n
#1394	PMID: 21455317	Leukocyte DNA methylation signature differentiates pancreatic cancer patients from healthy controls	Liang Wang	wang.liang@mayo.edu	USA	Mayo Clinic SPORE in Pancreatic Cancer (P50 CA102701) and the Department of Laboratory Medicine and Pathology, Mayo Clinic.	None Declared	Yes	Prospective	Whole Blood	Prior to start of treatment	2000-10-01	2006-06-01	PDAC	Yes	1	Novel	MMP14_P13_F	Single marker		PDAC vs Healthy	119	59	60				Histologically	No	31 resectable, 45 locally advance, 43 metastatic	no		60	29	31				n
#1394	PMID: 21455317	Leukocyte DNA methylation signature differentiates pancreatic cancer patients from healthy controls	Liang Wang	wang.liang@mayo.edu	USA	Mayo Clinic SPORE in Pancreatic Cancer (P50 CA102701) and the Department of Laboratory Medicine and Pathology, Mayo Clinic.	None Declared	Yes	Prospective	Whole Blood	Prior to start of treatment	2000-10-01	2006-06-01	PDAC	Yes	1	Novel	ITK_P114_F	Single marker	Unclear	PDAC vs Healthy	173	85	88				Histologically	No	58 Resectable, 59 Locally Advanced, 34 metastatic	no		215	107	108				n
#1394	PMID: 21455317	Leukocyte DNA methylation signature differentiates pancreatic cancer patients from healthy controls	Liang Wang	wang.liang@mayo.edu	USA	Mayo Clinic SPORE in Pancreatic Cancer (P50 CA102701) and the Department of Laboratory Medicine and Pathology, Mayo Clinic.	None Declared	Yes	Prospective	Whole Blood	Prior to start of treatment	2000-10-01	2006-06-01	PDAC	Yes	1	Novel	LCN2_P86_ R	Single marker	Unclear	PDAC vs Healthy	173	85	88				Histologically	No	58 Resectable, 59 Locally Advanced, 34 metastatic	no		215	107	108				n
#1394	PMID: 21455317	Leukocyte DNA methylation signature differentiates pancreatic cancer patients from healthy controls	Liang Wang	wang.liang@mayo.edu	USA	Mayo Clinic SPORE in Pancreatic Cancer (P50 CA102701) and the Department of Laboratory Medicine and Pathology, Mayo Clinic.	None Declared	Yes	Prospective	Whole Blood	Prior to start of treatment	2000-10-01	2006-06-01	PDAC	Yes	1	Novel	ITK_E166_R	Single marker	Unclear	PDAC vs Healthy	173	85	88				Histologically	No	58 Resectable, 59 Locally Advanced, 34 metastatic	no		215	107	108				n
#1394	PMID: 21455317	Leukocyte DNA methylation signature differentiates pancreatic cancer patients from healthy controls	Liang Wang	wang.liang@mayo.edu	USA	Mayo Clinic SPORE in Pancreatic Cancer (P50 CA102701) and the Department of Laboratory Medicine and Pathology, Mayo Clinic.	None Declared	Yes	Prospective	Whole Blood	Prior to start of treatment	2000-10-01	2006-06-01	PDAC	Yes	1	Novel	PECAM1_E32_R	Single marker	Unclear	PDAC vs Healthy	173	85	88				Histologically	No	58 Resectable, 59 Locally Advanced, 34 metastatic	no		215	107	108				n
#1394	PMID: 21455317	Leukocyte DNA methylation signature differentiates pancreatic cancer patients from healthy controls	Liang Wang	wang.liang@mayo.edu	USA	Mayo Clinic SPORE in Pancreatic Cancer (P50 CA102701) and the Department of Laboratory Medicine and Pathology, Mayo Clinic.	None Declared	Yes	Prospective	Whole Blood	Prior to start of treatment	2000-10-01	2006-06-01	PDAC	Yes	1	Novel	LMO2_E148_F	Single marker	Unclear	PDAC vs Healthy	173	85	88				Histologically	No	58 Resectable, 59 Locally Advanced, 34 metastatic	no		215	107	108				n
#1394	PMID: 21455317	Leukocyte DNA methylation signature differentiates pancreatic cancer patients from healthy controls	Liang Wang	wang.liang@mayo.edu	USA	Mayo Clinic SPORE in Pancreatic Cancer (P50 CA102701) and the Department of Laboratory Medicine and Pathology, Mayo Clinic.	None Declared	Yes	Prospective	Whole Blood	Prior to start of treatment	2000-10-01	2006-06-01	PDAC	Yes	1	Novel	IL10_P348_F	Single marker	Unclear	PDAC vs Healthy	173	85	88				Histologically	No	58 Resectable, 59 Locally Advanced, 34 metastatic	no		215	107	108				n
#1394	PMID: 21455317	Leukocyte DNA methylation signature differentiates pancreatic cancer patients from healthy controls	Liang Wang	wang.liang@mayo.edu	USA	Mayo Clinic SPORE in Pancreatic Cancer (P50 CA102701) and the Department of Laboratory Medicine and Pathology, Mayo Clinic.	None Declared	Yes	Prospective	Whole Blood	Prior to start of treatment	2000-10-01	2006-06-01	PDAC	Yes	1	Novel	LCK_E28_F	Single marker	Unclear	PDAC vs Healthy	173	85	88				Histologically	No	58 Resectable, 59 Locally Advanced, 34 metastatic	no		215	107	108				n
#1394	PMID: 21455317	Leukocyte DNA methylation signature differentiates pancreatic cancer patients from healthy controls	Liang Wang	wang.liang@mayo.edu	USA	Mayo Clinic SPORE in Pancreatic Cancer (P50 CA102701) and the Department of Laboratory Medicine and Pathology, Mayo Clinic.	None Declared	Yes	Prospective	Whole Blood	Prior to start of treatment	2000-10-01	2006-06-01	PDAC	Yes	1	Novel	RUNX3_P247_F	Single marker	Unclear	PDAC vs Healthy	173	85	88				Histologically	No	58 Resectable, 59 Locally Advanced, 34 metastatic	no		215	107	108				n
#1394	PMID: 21455317	Leukocyte DNA methylation signature differentiates pancreatic cancer patients from healthy controls	Liang Wang	wang.liang@mayo.edu	USA	Mayo Clinic SPORE in Pancreatic Cancer (P50 CA102701) and the Department of Laboratory Medicine and Pathology, Mayo Clinic.	None Declared	Yes	Prospective	Whole Blood	Prior to start of treatment	2000-10-01	2006-06-01	PDAC	Yes	1	Novel	LMO2_P794_R	Single marker	Unclear	PDAC vs Healthy	173	85	88				Histologically	No	58 Resectable, 59 Locally Advanced, 34 metastatic	no		215	107	108				n
#1394	PMID: 21455317	Leukocyte DNA methylation signature differentiates pancreatic cancer patients from healthy controls	Liang Wang	wang.liang@mayo.edu	USA	Mayo Clinic SPORE in Pancreatic Cancer (P50 CA102701) and the Department of Laboratory Medicine and Pathology, Mayo Clinic.	None Declared	Yes	Prospective	Whole Blood	Prior to start of treatment	2000-10-01	2006-06-01	PDAC	Yes	1	Novel	MMP14_P13_F	Single marker	Unclear	PDAC vs Healthy	173	85	88				Histologically	No	58 Resectable, 59 Locally Advanced, 34 metastatic	no		215	107	108				n
#1614	PMID: 31772690	Serum Levels of Kisspeptin Are Elevated in Patients with Pancreatic Cancer	Tom Luedde	tluedde@ukaachen.de	Germany	Not given	None Declared	Yes	Prospective	Serum	24h preop	2000-10-01	2006-06-01	PDAC	Yes	1	Novel	Kisspeptin	Single marker		PDAC vs Healthy	128	80	48	42-84	68		Histologically	no	!-5, II-5, III-111, IV-7	no		36
#1614	PMID: 31772690	Serum Levels of Kisspeptin Are Elevated in Patients with Pancreatic Cancer	Tom Luedde	tluedde@ukaachen.de	Germany	Not given	None Declared	Yes	Prospective	Serum	24h preop	2000-10-01	2006-06-01	PDAC	Yes	1	CA19-9	CA19-9	Single marker		PDAC vs Healthy	128	80	48	42-84	68		Histologically	no	!-5, II-5, III-111, IV-7	no		36
#1614	PMID: 31772690	Serum Levels of Kisspeptin Are Elevated in Patients with Pancreatic Cancer	Tom Luedde	tluedde@ukaachen.de	Germany	Not given	None Declared	Yes	Prospective	Serum	24h preop	2000-10-01	2006-06-01	PDAC	Yes	1	Novel	CEA	Single marker		PDAC vs Healthy	128	80	48	42-84	68		Histologically	no	!-5, II-5, III-111, IV-7	no		36
#1614	PMID: 31772690	Serum Levels of Kisspeptin Are Elevated in Patients with Pancreatic Cancer	Tom Luedde	tluedde@ukaachen.de	Germany	Not given	None Declared	Yes	Prospective	Serum	24h preop	2000-10-01	2006-06-01	PDAC	Yes	2	CA19-9	Kisspep & CA19-9	Multi-marker panel		PDAC vs Healthy	128	80	48	42-84	68		Histologically	no	!-5, II-5, III-111, IV-7	no		36
#1616	PMID: 30805627	High baseline soluble urokinase plasminogen activator receptor (suPAR) serum levels indicate adverse outcome after resection of pancreatic adenocarcinoma	Luedde, T.	tluedde@ukaachen.de	Germany	ERC, German Cancer Aid, , German Research Foundation, IZKF, Medical faculy of RWTH	None Declared	Yes	Prospective	Serum	Prior to cyst puncture by Surgery	2011	2016	PDAC	No	1	Novel	suPAR	Single marker	No	PDAC vs Healthy	104	67	37	42-84	68.5		immunohistochemistry	no	I(4),II(4),III(90),IV(4) *** the percentages in the paper don't reflect whole numbers of patients	no		60
#1616	PMID: 30805627	High baseline soluble urokinase plasminogen activator receptor (suPAR) serum levels indicate adverse outcome after resection of pancreatic adenocarcinoma	Luedde, T.	tluedde@ukaachen.de	Germany	ERC, German Cancer Aid, , German Research Foundation, IZKF, Medical faculy of RWTH	None Declared	Yes	Prospective	Serum	Prior to cyst puncture by Surgery	2011	2016	PDAC	No	1	CA19-9	CA19-9	Single marker		PDAC vs Healthy	104	67	37	42-84	68.5		immunohistochemistry	no	I(4),II(4),III(90),IV(4) *** the percentages in the paper don't reflect whole numbers of patients	no		60
#1616	PMID: 30805627	High baseline soluble urokinase plasminogen activator receptor (suPAR) serum levels indicate adverse outcome after resection of pancreatic adenocarcinoma	Luedde, T.	tluedde@ukaachen.de	Germany	ERC, German Cancer Aid, , German Research Foundation, IZKF, Medical faculy of RWTH	None Declared	Yes	Prospective	Serum	Prior to cyst puncture by Surgery	2011	2016	PDAC	No	1	Novel	CEA	Single marker		PDAC vs Healthy	104	67	37	42-84	68.5		immunohistochemistry	no	I(4),II(4),III(90),IV(4) *** the percentages in the paper don't reflect whole numbers of patients	no		60
#1616	PMID: 30805627	High baseline soluble urokinase plasminogen activator receptor (suPAR) serum levels indicate adverse outcome after resection of pancreatic adenocarcinoma	Luedde, T.	tluedde@ukaachen.de	Germany	ERC, German Cancer Aid, , German Research Foundation, IZKF, Medical faculy of RWTH	None Declared	Yes	Prospective	Serum	Prior to cyst puncture by Surgery	2011	2016	PDAC	No	2	CA19-9	suPAR & CA19.9	Multi-marker panel		PDAC vs Healthy	104	67	37	42-84	68.5		immunohistochemistry	no	I(4),II(4),III(90),IV(4) *** the percentages in the paper don't reflect whole numbers of patients	no		60
#4929	PMID: 27574557	Utility of different serum fibrosis markers in diagnosing patients with chronic pancreatitis and pancreatic adenocarcinoma	Anna Kozak	annak.kozak@gmail.com	Poland	Not given	None Declared	Yes	Prospective	Plasma	at time of hospitalisation	2011	2016	PDAC	yes	1	Novel	Hyaluronic Acid	Single marker		PDAC vs Healthy	74	28	42	30-88			Radiologically or cytologically or histologically	no	T1 = 21 patients (28%); T2 = 31 patients (42%); T3 = 10 patients (13%); T4 = 12 patients (16%); N0 = 55 patients (74%); N1 = 19 patients (26%); M0 = 47 patients (64%); and M1 = 27 patients (36%).	no		15						age matched, hospitalized
#4929	PMID: 27574557	Utility of different serum fibrosis markers in diagnosing patients with chronic pancreatitis and pancreatic adenocarcinoma	Anna Kozak	annak.kozak@gmail.com	Poland	Not given	None Declared	Yes	Prospective	Plasma	at time of hospitalisation	2011	2016	PDAC	yes	1	Novel	Fractalkine	Single marker		PDAC vs Healthy	74	28	42	30-88			Radiologically or cytologically or histologically	no	T1 = 21 patients (28%); T2 = 31 patients (42%); T3 = 10 patients (13%); T4 = 12 patients (16%); N0 = 55 patients (74%); N1 = 19 patients (26%); M0 = 47 patients (64%); and M1 = 27 patients (36%).	no		15						age matched, hospitalized
#4929	PMID: 27574557	Utility of different serum fibrosis markers in diagnosing patients with chronic pancreatitis and pancreatic adenocarcinoma	Anna Kozak	annak.kozak@gmail.com	Poland	Not given	None Declared	Yes	Prospective	Plasma	at time of hospitalisation	2011	2016	PDAC	yes	1	Novel	TGF B1	Single marker		PDAC vs Healthy	74	28	42	30-88			Radiologically or cytologically or histologically	no	T1 = 21 patients (28%); T2 = 31 patients (42%); T3 = 10 patients (13%); T4 = 12 patients (16%); N0 = 55 patients (74%); N1 = 19 patients (26%); M0 = 47 patients (64%); and M1 = 27 patients (36%).	no		15						age matched, hospitalized
#4929	PMID: 27574557	Utility of different serum fibrosis markers in diagnosing patients with chronic pancreatitis and pancreatic adenocarcinoma	Anna Kozak	annak.kozak@gmail.com	Poland	Not given	None Declared	Yes	Prospective	Plasma	at time of hospitalisation	2011	2016	PDAC	yes	1	Novel	Monocyte chemoattractant Protein 1	Single marker		PDAC vs Healthy	74	28	42	30-88			Radiologically or cytologically or histologically	no	T1 = 21 patients (28%); T2 = 31 patients (42%); T3 = 10 patients (13%); T4 = 12 patients (16%); N0 = 55 patients (74%); N1 = 19 patients (26%); M0 = 47 patients (64%); and M1 = 27 patients (36%).	no		15						age matched, hospitalized
#749	PMID: 16428484	Serum markers in patients with resectable pancreatic adenocarcinoma: Macrophage inhibitory cytokine 1 versus CA19-9	Michael Goggins	mgoggins@jhmi.edu	USA	NationalCancerInstituteSpecializedProgramsofResearch ExcellencegrantCA62924andagrantfromtheMildred-Scheel-Stiftung, Deutsche Krebshilfe.	The costs of publication of this article were defrayed in part by the payment of page charges. This article must therefore be hereby marked advertisement in accordance with 18 U.S.C. Section 1734 solely to indicate this fact.	yes	Prospective	Serum	Prior to surgery or endoscopy	2006	2013	PDAC	Yes	1	Novel	MIC-1	Single marker	yes	PDAC vs Healthy	50	22	0.28			67.6	Histologically or cytologically		1N0Mx , n = 1; T1N1Mx , n =2;T2N0Mx,n =2;T2N1Mx,n =3;T3N0Mx,n =9;T3N1Mx,n =30; T4NxMx, n = 2; T4N1Mx, n = 1	no		50	14	36			61.1	age matched, hospitalized
#749	PMID: 16428484	Serum markers in patients with resectable pancreatic adenocarcinoma: Macrophage inhibitory cytokine 1 versus CA19-9	Michael Goggins	mgoggins@jhmi.edu	USA	NationalCancerInstituteSpecializedProgramsofResearch ExcellencegrantCA62924andagrantfromtheMildred-Scheel-Stiftung, Deutsche Krebshilfe.	The costs of publication of this article were defrayed in part by the payment of page charges. This article must therefore be hereby marked advertisement in accordance with 18 U.S.C. Section 1734 solely to indicate this fact.	yes	Prospective	Serum	Prior to surgery or endoscopy	2006	2013	PDAC	Yes	1	Novel	Osteopontin	Single marker	yes	PDAC vs Healthy	50	22	0.28			67.6	Histologically or cytologically		1N0Mx , n = 1; T1N1Mx , n =2;T2N0Mx,n =2;T2N1Mx,n =3;T3N0Mx,n =9;T3N1Mx,n =30; T4NxMx, n = 2; T4N1Mx, n = 1	no		50	14	36			61.1	age matched, hospitalized
#749	PMID: 16428484	Serum markers in patients with resectable pancreatic adenocarcinoma: Macrophage inhibitory cytokine 1 versus CA19-9	Michael Goggins	mgoggins@jhmi.edu	USA	NationalCancerInstituteSpecializedProgramsofResearch ExcellencegrantCA62924andagrantfromtheMildred-Scheel-Stiftung, Deutsche Krebshilfe.	The costs of publication of this article were defrayed in part by the payment of page charges. This article must therefore be hereby marked advertisement in accordance with 18 U.S.C. Section 1734 solely to indicate this fact.	yes	Prospective	Serum	Prior to surgery or endoscopy	2006	2013	PDAC	Yes	1	Novel	TIMP-1	Single marker	yes	PDAC vs Healthy	50	22	0.28			67.6	Histologically or cytologically		1N0Mx , n = 1; T1N1Mx , n =2;T2N0Mx,n =2;T2N1Mx,n =3;T3N0Mx,n =9;T3N1Mx,n =30; T4NxMx, n = 2; T4N1Mx, n = 1	no		50	14	36			61.1	age matched, hospitalized
#749	PMID: 16428484	Serum markers in patients with resectable pancreatic adenocarcinoma: Macrophage inhibitory cytokine 1 versus CA19-9	Michael Goggins	mgoggins@jhmi.edu	USA	NationalCancerInstituteSpecializedProgramsofResearch ExcellencegrantCA62924andagrantfromtheMildred-Scheel-Stiftung, Deutsche Krebshilfe.	The costs of publication of this article were defrayed in part by the payment of page charges. This article must therefore be hereby marked advertisement in accordance with 18 U.S.C. Section 1734 solely to indicate this fact.	yes	Prospective	Serum	Prior to surgery or endoscopy	2006	2013	PDAC	Yes	1	Novel	HIP/PAP	Single marker	yes	PDAC vs Healthy	50	22	0.28			67.6	Histologically or cytologically		1N0Mx , n = 1; T1N1Mx , n =2;T2N0Mx,n =2;T2N1Mx,n =3;T3N0Mx,n =9;T3N1Mx,n =30; T4NxMx, n = 2; T4N1Mx, n = 1	no		50	14	36			61.1	age matched, hospitalized
#749	PMID: 16428484	Serum markers in patients with resectable pancreatic adenocarcinoma: Macrophage inhibitory cytokine 1 versus CA19-9	Michael Goggins	mgoggins@jhmi.edu	USA	NationalCancerInstituteSpecializedProgramsofResearch ExcellencegrantCA62924andagrantfromtheMildred-Scheel-Stiftung, Deutsche Krebshilfe.	The costs of publication of this article were defrayed in part by the payment of page charges. This article must therefore be hereby marked advertisement in accordance with 18 U.S.C. Section 1734 solely to indicate this fact.	yes	Prospective	Serum	Prior to surgery or endoscopy	2002	2004	PDAC	Yes	1	CA19-9	CA19-9	Single marker	yes	PDAC vs Healthy	50	22	0.28			67.6	Histologically or cytologically		1N0Mx , n = 1; T1N1Mx , n =2;T2N0Mx,n =2;T2N1Mx,n =3;T3N0Mx,n =9;T3N1Mx,n =30; T4NxMx, n = 2; T4N1Mx, n = 1	no		50	14	36			61.1	age matched, hospitalized
#749	PMID: 16428484	Serum markers in patients with resectable pancreatic adenocarcinoma: Macrophage inhibitory cytokine 1 versus CA19-9	Michael Goggins	mgoggins@jhmi.edu	USA	NationalCancerInstituteSpecializedProgramsofResearch ExcellencegrantCA62924andagrantfromtheMildred-Scheel-Stiftung, Deutsche Krebshilfe.	The costs of publication of this article were defrayed in part by the payment of page charges. This article must therefore be hereby marked advertisement in accordance with 18 U.S.C. Section 1734 solely to indicate this fact.	yes	Prospective	Serum	Prior to surgery or endoscopy	2002	2004	PDAC	Yes	1	CA19-9	CA19-9	Single marker	yes	PDAC vs Benign	50	22	0.28			67.6	Histologically or cytologically		1N0Mx , n = 1; T1N1Mx , n =2;T2N0Mx,n =2;T2N1Mx,n =3;T3N0Mx,n =9;T3N1Mx,n =30; T4NxMx, n = 2; T4N1Mx, n = 1	no									50	Chronic pancreatitis	25	25			57
#749	PMID: 16428484	Serum markers in patients with resectable pancreatic adenocarcinoma: Macrophage inhibitory cytokine 1 versus CA19-9	Michael Goggins	mgoggins@jhmi.edu	USA	NationalCancerInstituteSpecializedProgramsofResearch ExcellencegrantCA62924andagrantfromtheMildred-Scheel-Stiftung, Deutsche Krebshilfe.	The costs of publication of this article were defrayed in part by the payment of page charges. This article must therefore be hereby marked advertisement in accordance with 18 U.S.C. Section 1734 solely to indicate this fact.	yes	Prospective	Serum	Prior to surgery or endoscopy	2002	2004	PDAC	Yes	1	Novel	Hip/PAP	Single marker	yes	PDAC vs Benign	50	22	0.28			67.6	Histologically or cytologically		1N0Mx , n = 1; T1N1Mx , n =2;T2N0Mx,n =2;T2N1Mx,n =3;T3N0Mx,n =9;T3N1Mx,n =30; T4NxMx, n = 2; T4N1Mx, n = 1	no									50	Chronic pancreatitis	25	25			57
#749	PMID: 16428484	Serum markers in patients with resectable pancreatic adenocarcinoma: Macrophage inhibitory cytokine 1 versus CA19-9	Michael Goggins	mgoggins@jhmi.edu	USA	NationalCancerInstituteSpecializedProgramsofResearch ExcellencegrantCA62924andagrantfromtheMildred-Scheel-Stiftung, Deutsche Krebshilfe.	The costs of publication of this article were defrayed in part by the payment of page charges. This article must therefore be hereby marked advertisement in accordance with 18 U.S.C. Section 1734 solely to indicate this fact.	yes	Prospective	Serum	Prior to surgery or endoscopy	2002	2004	PDAC	Yes	1	Novel	TIMP-1	Single marker	yes	PDAC vs Benign	50	22	0.28			67.6	Histologically or cytologically		1N0Mx , n = 1; T1N1Mx , n =2;T2N0Mx,n =2;T2N1Mx,n =3;T3N0Mx,n =9;T3N1Mx,n =30; T4NxMx, n = 2; T4N1Mx, n = 1	no									50	Chronic pancreatitis	25	25			57
#749	PMID: 16428484	Serum markers in patients with resectable pancreatic adenocarcinoma: Macrophage inhibitory cytokine 1 versus CA19-9	Michael Goggins	mgoggins@jhmi.edu	USA	NationalCancerInstituteSpecializedProgramsofResearch ExcellencegrantCA62924andagrantfromtheMildred-Scheel-Stiftung, Deutsche Krebshilfe.	The costs of publication of this article were defrayed in part by the payment of page charges. This article must therefore be hereby marked advertisement in accordance with 18 U.S.C. Section 1734 solely to indicate this fact.	yes	Prospective	Serum	Prior to surgery or endoscopy	2002	2004	PDAC	Yes	1	Novel	Osteopontin	Single marker	yes	PDAC vs Benign	50	22	0.28			67.6	Histologically or cytologically		1N0Mx , n = 1; T1N1Mx , n =2;T2N0Mx,n =2;T2N1Mx,n =3;T3N0Mx,n =9;T3N1Mx,n =30; T4NxMx, n = 2; T4N1Mx, n = 1	no									50	Chronic pancreatitis	25	25			57
#749	PMID: 16428484	Serum markers in patients with resectable pancreatic adenocarcinoma: Macrophage inhibitory cytokine 1 versus CA19-9	Michael Goggins	mgoggins@jhmi.edu	USA	NationalCancerInstituteSpecializedProgramsofResearch ExcellencegrantCA62924andagrantfromtheMildred-Scheel-Stiftung, Deutsche Krebshilfe.	The costs of publication of this article were defrayed in part by the payment of page charges. This article must therefore be hereby marked advertisement in accordance with 18 U.S.C. Section 1734 solely to indicate this fact.	yes	Prospective	Serum	Prior to surgery or endoscopy	2002	2004	PDAC	Yes	1	Novel	MIC-1	Single marker	yes	PDAC vs Benign	50	22	0.28			67.6	Histologically or cytologically		1N0Mx , n = 1; T1N1Mx , n =2;T2N0Mx,n =2;T2N1Mx,n =3;T3N0Mx,n =9;T3N1Mx,n =30; T4NxMx, n = 2; T4N1Mx, n = 1	no									50	Chronic pancreatitis	25	25			57
#421	PMID: 26735340	Metabolomic profile in pancreatic cancer patients: A consensusbased approach to identify highly discriminating metabolites	Valerio Pazienza	pazienza_valerio@yahoo.it	Italy	RC1403GA41 and RC1503GA40 to VP) IRCCS “Casa Sollievo della Sofferenza”, Hospital and by the “5x1000” voluntary contributions. VP contributed also as PhD- student from Department of Agricultural Sciences, Food and Environment, University of Foggia, Italy. This research was supported also by ADP 2012 Project founded by the Autonomous Province of Trento, Italy.	None Declared	yes	Prospective	Serum	Prior	2002	2004	PDAC	Yes	1	Novel	Palmitic Acid	Single marker	yes	PDAC vs Healthy	27	13	14	56-76	66		?	No	Tx 4 T1 1 (4.35) T2 2 (8.7) T3 11 (47.83) T4 9 (39.13),Nx 9 N0 4 (22.22) N1 13 (72.22) N2 1 (5.56) Mx 7 M0 10 (50) M1 10 (50)	no		40
#421	PMID: 26735340	Metabolomic profile in pancreatic cancer patients: A consensusbased approach to identify highly discriminating metabolites	Valerio Pazienza	pazienza_valerio@yahoo.it	Italy	RC1403GA41 and RC1503GA40 to VP) IRCCS “Casa Sollievo della Sofferenza”, Hospital and by the “5x1000” voluntary contributions. VP contributed also as PhD- student from Department of Agricultural Sciences, Food and Environment, University of Foggia, Italy. This research was supported also by ADP 2012 Project founded by the Autonomous Province of Trento, Italy.	None Declared	yes	Prospective	Serum	Prior	2002	2004	PDAC	Yes	1	CA19-9	CA19-9	Single marker	yes	PDAC vs Healthy	27	13	14	56-76	66		?	No	Tx 4 T1 1 (4.35) T2 2 (8.7) T3 11 (47.83) T4 9 (39.13),Nx 9 N0 4 (22.22) N1 13 (72.22) N2 1 (5.56) Mx 7 M0 10 (50) M1 10 (50)	no		40
#820	PMID: 26016480	Survivin expression and serum levels in pancreatic cancer	Wei Feng	fengweiqd@163.com	China	This work was supported by funding from the Shandong natural science research foundation (No: 2014ZRB01198).	None Declared	Yes	Prospective	Serum	Prior to surgery or treatment	2002	2004	PDAC	Yes	1	Novel	Surviviv	Single marker		PDAC vs Healthy	80	62	18	32-71	46		cytologically or histologically	no	I 17 II 37 III 18 IV 8	no		80						volunteers
#329	PMID: 22703527	Serum high mobility group box-1 is a powerful diagnostic and prognostic biomarker for pancreatic ductal adenocarcinoma	Si Young Song	sysong@yuhs.ac	Japan	This study was financially supported by the Korean Medical Women’s Association (KMWA-2009-12) and a faculty research grant of Yonsei University College of Medicine for 2009 (6-2009-0091).	None Declared	Yes	Prospective	Serum	Prior to surgery or endoscopy	2002	2004	PDAC	no	1	Novel	HMGB1	Single marker	Yes	PDAC vs Healthy	25	15	10			58.2	Histologically	no	2:6:8:9	no		25	15	10			54.2	no assoc risk
#329	PMID: 22703527	Serum high mobility group box-1 is a powerful diagnostic and prognostic biomarker for pancreatic ductal adenocarcinoma	Si Young Song	sysong@yuhs.ac	Japan	This study was financially supported by the Korean Medical Women’s Association (KMWA-2009-12) and a faculty research grant of Yonsei University College of Medicine for 2009 (6-2009-0091).	None Declared	Yes	Prospective	Serum	Prior to surgery or endoscopy	2012-05-01	2012-11-01	PDAC	no	1	Novel	HMGB1	Single marker	Yes	PDAC vs Benign	25	15	10			58.2	Histologically	no	2:6:8:9	no									25	CP	15	10			55.7
#329	PMID: 22703527	Serum high mobility group box-1 is a powerful diagnostic and prognostic biomarker for pancreatic ductal adenocarcinoma	Si Young Song	sysong@yuhs.ac	Japan	This study was financially supported by the Korean Medical Women’s Association (KMWA-2009-12) and a faculty research grant of Yonsei University College of Medicine for 2009 (6-2009-0091).	None Declared	Yes	Prospective	Serum	Prior to surgery or endoscopy	2012-05-01	2012-11-01	PDAC	no	1	CA19-9	CA19-9	Single marker	Yes	PDAC vs Healthy	25	15	10			58.2	Histologically	no	2:6:8:9	no		25	15	10			54.2	no assoc risk
#329	PMID: 22703527	Serum high mobility group box-1 is a powerful diagnostic and prognostic biomarker for pancreatic ductal adenocarcinoma	Si Young Song	sysong@yuhs.ac	Japan	This study was financially supported by the Korean Medical Women’s Association (KMWA-2009-12) and a faculty research grant of Yonsei University College of Medicine for 2009 (6-2009-0091).	None Declared	Yes	Prospective	Serum	Prior to surgery or endoscopy	2007-01-01	2012-12-01	PDAC	no	1	CA19-9	CA19-9	Single marker	Yes	PDAC vs Benign	25	15	10			58.2	Histologically	no	2:6:8:9	no									25	CP	15	10			55.7
#329	PMID: 22703527	Serum high mobility group box-1 is a powerful diagnostic and prognostic biomarker for pancreatic ductal adenocarcinoma	Si Young Song	sysong@yuhs.ac	Japan	This study was financially supported by the Korean Medical Women’s Association (KMWA-2009-12) and a faculty research grant of Yonsei University College of Medicine for 2009 (6-2009-0091).	None Declared	Yes	Prospective	Serum	Prior to surgery or endoscopy	2006-01-01	2011-05-01	PDAC	no	1	Novel	HMGB1	Single marker	Yes	PDAC vs Healthy	45	27	18			57.2	Histopathologically	no	3:9:15:18	no		45	28	17			55.1	no aassoc risk
#329	PMID: 22703527	Serum high mobility group box-1 is a powerful diagnostic and prognostic biomarker for pancreatic ductal adenocarcinoma	Si Young Song	sysong@yuhs.ac	Japan	This study was financially supported by the Korean Medical Women’s Association (KMWA-2009-12) and a faculty research grant of Yonsei University College of Medicine for 2009 (6-2009-0091).	None Declared	Yes	Prospective	Serum	Prior to surgery or endoscopy	2006-01-01	2011-05-01	PDAC	no	1	Novel	HMGB1	Single marker	Yes	PDAC vs Benign	45	27	18			57.2	Histopathologically	no	3:9:15:18	no									45	CP	27	18			54.7
#329	PMID: 22703527	Serum high mobility group box-1 is a powerful diagnostic and prognostic biomarker for pancreatic ductal adenocarcinoma	Si Young Song	sysong@yuhs.ac	Japan	This study was financially supported by the Korean Medical Women’s Association (KMWA-2009-12) and a faculty research grant of Yonsei University College of Medicine for 2009 (6-2009-0091).	None Declared	Yes	Prospective	Serum	Prior to surgery or endoscopy	2006-01-01	2011-05-01	PDAC	no	1	CA19-9	CA19-9	Single marker	Yes	PDAC vs Healthy	45	27	18			57.2	Histopathologically	no	3:9:15:18	no		45	28	17			55.1	no aassoc risk
#329	PMID: 22703527	Serum high mobility group box-1 is a powerful diagnostic and prognostic biomarker for pancreatic ductal adenocarcinoma	Si Young Song	sysong@yuhs.ac	Japan	This study was financially supported by the Korean Medical Women’s Association (KMWA-2009-12) and a faculty research grant of Yonsei University College of Medicine for 2009 (6-2009-0091).	None Declared	Yes	Prospective	Serum	Prior to surgery or endoscopy	2006-01-01	2011-05-01	PDAC	no	1	CA19-9	CA19-9	Single marker	Yes	PDAC vs Benign	45	27	18			57.2	Histopathologically	no	3:9:15:18	no									45	CP	27	18			54.7
#329	PMID: 22703527	Serum high mobility group box-1 is a powerful diagnostic and prognostic biomarker for pancreatic ductal adenocarcinoma	Si Young Song	sysong@yuhs.ac	Japan	This study was financially supported by the Korean Medical Women’s Association (KMWA-2009-12) and a faculty research grant of Yonsei University College of Medicine for 2009 (6-2009-0091).	None Declared	Yes	Prospective	Serum	Prior to surgery or endoscopy	2006-01-01	2011-05-01	PDAC	no	1	Novel	HMGB1	Single marker	Yes	PDAC vs Benign	25	15	10			58.2	Histologically	no	2:6:8:9	no
#329	PMID: 22703527	Serum high mobility group box-1 is a powerful diagnostic and prognostic biomarker for pancreatic ductal adenocarcinoma	Si Young Song	sysong@yuhs.ac	Japan	This study was financially supported by the Korean Medical Women’s Association (KMWA-2009-12) and a faculty research grant of Yonsei University College of Medicine for 2009 (6-2009-0091).	None Declared	Yes	Prospective	Serum	Prior to surgery or endoscopy	2006-01-01	2011-05-01	PDAC	no	1	CA19-9	CA19-9	Single marker	Yes	PDAC vs Benign	25	15	10			58.2	Histologically	no	2:6:8:9	no
#329	PMID: 22703527	Serum high mobility group box-1 is a powerful diagnostic and prognostic biomarker for pancreatic ductal adenocarcinoma	Si Young Song	sysong@yuhs.ac	Japan	This study was financially supported by the Korean Medical Women’s Association (KMWA-2009-12) and a faculty research grant of Yonsei University College of Medicine for 2009 (6-2009-0091).	None Declared	Yes	Prospective	Serum	Prior to surgery or endoscopy	2006-01-01	2011-05-01	PDAC	no	1	Novel	CEA	Single marker	Yes	PDAC vs Benign	25	15	10			58.2	Histologically	no	2:6:8:9	no
#329	PMID: 22703527	Serum high mobility group box-1 is a powerful diagnostic and prognostic biomarker for pancreatic ductal adenocarcinoma	Si Young Song	sysong@yuhs.ac	Japan	This study was financially supported by the Korean Medical Women’s Association (KMWA-2009-12) and a faculty research grant of Yonsei University College of Medicine for 2009 (6-2009-0091).	None Declared	Yes	Prospective	Serum	Prior to surgery or endoscopy	2006-01-01	2011-05-01	PDAC	no	2	CA19-9	HMGB1 & CA19-9	Multi-marker panel	Yes	PDAC vs Benign	25	15	10			58.2	Histologically	no	2:6:8:9	no
#329	PMID: 22703527	Serum high mobility group box-1 is a powerful diagnostic and prognostic biomarker for pancreatic ductal adenocarcinoma	Si Young Song	sysong@yuhs.ac	Japan	This study was financially supported by the Korean Medical Women’s Association (KMWA-2009-12) and a faculty research grant of Yonsei University College of Medicine for 2009 (6-2009-0091).	None Declared	Yes	Prospective	Serum	Prior to surgery or endoscopy	2006-01-01	2011-05-01	PDAC	no	2	Novel	HMGB1 & CEA	Multi-marker panel	Yes	PDAC vs Benign	25	15	10			58.2	Histologically	no	2:6:8:9	no
#329	PMID: 22703527	Serum high mobility group box-1 is a powerful diagnostic and prognostic biomarker for pancreatic ductal adenocarcinoma	Si Young Song	sysong@yuhs.ac	Japan	This study was financially supported by the Korean Medical Women’s Association (KMWA-2009-12) and a faculty research grant of Yonsei University College of Medicine for 2009 (6-2009-0091).	None Declared	Yes	Prospective	Serum	Prior to surgery or endoscopy	2006-01-01	2011-05-01	PDAC	no	2	CA19-9	CA19-9 & CEA	Multi-marker panel	Yes	PDAC vs Benign	25	15	10			58.2	Histologically	no	2:6:8:9	no
#329	PMID: 22703527	Serum high mobility group box-1 is a powerful diagnostic and prognostic biomarker for pancreatic ductal adenocarcinoma	Si Young Song	sysong@yuhs.ac	Japan	This study was financially supported by the Korean Medical Women’s Association (KMWA-2009-12) and a faculty research grant of Yonsei University College of Medicine for 2009 (6-2009-0091).	None Declared	Yes	Prospective	Serum	Prior to surgery or endoscopy	2006-01-01	2011-05-01	PDAC	no	3	CA19-9	HMGB1 & CA19-9 & CEA	Multi-marker panel	Yes	PDAC vs Benign	25	15	10			58.2	Histologically	no	2:6:8:9	no
#329	PMID: 22703527	Serum high mobility group box-1 is a powerful diagnostic and prognostic biomarker for pancreatic ductal adenocarcinoma	Si Young Song	sysong@yuhs.ac	Japan	This study was financially supported by the Korean Medical Women’s Association (KMWA-2009-12) and a faculty research grant of Yonsei University College of Medicine for 2009 (6-2009-0091).	None Declared	Yes	Prospective	Serum	Prior to surgery or endoscopy	2006-01-01	2011-05-01	PDAC	no	1	Novel	HMGB1	Single marker	Yes	PDAC vs Benign	45	27	18			55	Histopathologically	no	3:9:15:18	no																	90	Combined HS & CP
#329	PMID: 22703527	Serum high mobility group box-1 is a powerful diagnostic and prognostic biomarker for pancreatic ductal adenocarcinoma	Si Young Song	sysong@yuhs.ac	Japan	This study was financially supported by the Korean Medical Women’s Association (KMWA-2009-12) and a faculty research grant of Yonsei University College of Medicine for 2009 (6-2009-0091).	None Declared	Yes	Prospective	Serum	Prior to surgery or endoscopy	2006-01-01	2011-05-01	PDAC	no	1	CA19-9	CA19-9	Single marker	Yes	PDAC vs Benign	45	27	18			55	Histopathologically	no	3:9:15:18	no																	90	Combined HS & CP
#329	PMID: 22703527	Serum high mobility group box-1 is a powerful diagnostic and prognostic biomarker for pancreatic ductal adenocarcinoma	Si Young Song	sysong@yuhs.ac	Japan	This study was financially supported by the Korean Medical Women’s Association (KMWA-2009-12) and a faculty research grant of Yonsei University College of Medicine for 2009 (6-2009-0091).	None Declared	Yes	Prospective	Serum	Prior to surgery or endoscopy	2006-01-01	2011-05-01	PDAC	no	1	Novel	CEA	Single marker	Yes	PDAC vs Benign	45	27	18			55	Histopathologically	no	3:9:15:18	no																	90	Combined HS & CP
#329	PMID: 22703527	Serum high mobility group box-1 is a powerful diagnostic and prognostic biomarker for pancreatic ductal adenocarcinoma	Si Young Song	sysong@yuhs.ac	Japan	This study was financially supported by the Korean Medical Women’s Association (KMWA-2009-12) and a faculty research grant of Yonsei University College of Medicine for 2009 (6-2009-0091).	None Declared	Yes	Prospective	Serum	Prior to surgery or endoscopy	2006-01-01	2011-05-01	PDAC	no	2	CA19-9	HMGB1 & CA19-9	Multi-marker panel	Yes	PDAC vs Benign	45	27	18			55	Histopathologically	no	3:9:15:18	no																	90	Combined HS & CP
#329	PMID: 22703527	Serum high mobility group box-1 is a powerful diagnostic and prognostic biomarker for pancreatic ductal adenocarcinoma	Si Young Song	sysong@yuhs.ac	Japan	This study was financially supported by the Korean Medical Women’s Association (KMWA-2009-12) and a faculty research grant of Yonsei University College of Medicine for 2009 (6-2009-0091).	None Declared	Yes	Prospective	Serum	Prior to surgery or endoscopy	2006-01-01	2011-05-01	PDAC	no	2	Novel	HMGB1 & CEA	Multi-marker panel	Yes	PDAC vs Benign	45	27	18			55	Histopathologically	no	3:9:15:18	no																	90	Combined HS & CP
#329	PMID: 22703527	Serum high mobility group box-1 is a powerful diagnostic and prognostic biomarker for pancreatic ductal adenocarcinoma	Si Young Song	sysong@yuhs.ac	Japan	This study was financially supported by the Korean Medical Women’s Association (KMWA-2009-12) and a faculty research grant of Yonsei University College of Medicine for 2009 (6-2009-0091).	None Declared	Yes	Prospective	Serum	Prior to surgery or endoscopy	2006-01-01	2011-05-01	PDAC	no	2	CA19-9	CA19-9 & CEA	Multi-marker panel	Yes	PDAC vs Benign	45	27	18			55	Histopathologically	no	3:9:15:18	no																	90	Combined HS & CP
#329	PMID: 22703527	Serum high mobility group box-1 is a powerful diagnostic and prognostic biomarker for pancreatic ductal adenocarcinoma	Si Young Song	sysong@yuhs.ac	Japan	This study was financially supported by the Korean Medical Women’s Association (KMWA-2009-12) and a faculty research grant of Yonsei University College of Medicine for 2009 (6-2009-0091).	None Declared	Yes	Prospective	Serum	Prior to surgery or endoscopy	2006-01-01	2011-05-01	PDAC	no	3	CA19-9	HMGB1 & CA19-9 & CEA	Multi-marker panel	Yes	PDAC vs Benign	45	27	18			55	Histopathologically	no	3:9:15:18	no																	90	Combined HS & CP
#656	PMID: 29976637	Pre-operative plasma miR-21-5p is a sensitive biomarker and independent prognostic factor in patients with pancreatic ductal adenocarcinoma undergoing surgical resection	VLADIMIR PROCHAZKA	Prochazka.Vladimir@fnbrno.cz	Czech Republic	Supported by Ministry of Health of the Czech Republic, grant No. 16-31314A. All rights reserved.	None Declared	Yes	Prospective	Plasma	Prior to surgery or treatment	2006-01-01	2011-05-01	PDAC	Yes	1	Novel	miR-21-5p	Single marker		PDAC vs Healthy	25	11	14					no	25 III			24
#656	PMID: 29976637	Pre-operative plasma miR-21-5p is a sensitive biomarker and independent prognostic factor in patients with pancreatic ductal adenocarcinoma undergoing surgical resection	VLADIMIR PROCHAZKA	Prochazka.Vladimir@fnbrno.cz	Czech Republic	Supported by Ministry of Health of the Czech Republic, grant No. 16-31314A. All rights reserved.	None Declared	Yes	Prospective	Plasma	Prior to surgery or treatment	2006-01-01	2011-05-01	PDAC	Yes	1	Novel	miR-375	Single marker		PDAC vs Healthy	25	11	14					no	25 III			24
#656	PMID: 29976637	Pre-operative plasma miR-21-5p is a sensitive biomarker and independent prognostic factor in patients with pancreatic ductal adenocarcinoma undergoing surgical resection	VLADIMIR PROCHAZKA	Prochazka.Vladimir@fnbrno.cz	Czech Republic	Supported by Ministry of Health of the Czech Republic, grant No. 16-31314A. All rights reserved.	None Declared	Yes	Prospective	Plasma	Prior to surgery or treatment	2006-01-01	2011-05-01	PDAC	Yes	1	Novel	miR-155	Single marker		PDAC vs Healthy	25	11	14					no	25 III			24
#656	PMID: 29976637	Pre-operative plasma miR-21-5p is a sensitive biomarker and independent prognostic factor in patients with pancreatic ductal adenocarcinoma undergoing surgical resection	VLADIMIR PROCHAZKA	Prochazka.Vladimir@fnbrno.cz	Czech Republic	Supported by Ministry of Health of the Czech Republic, grant No. 16-31314A. All rights reserved.	None Declared	Yes	Prospective	Plasma	Prior to surgery or treatment	2006-01-01	2011-05-01	PDAC	Yes	1	Novel	miR-17-5p	Single marker		PDAC vs Healthy	25	11	14					no	25 III			24
#656	PMID: 29976637	Pre-operative plasma miR-21-5p is a sensitive biomarker and independent prognostic factor in patients with pancreatic ductal adenocarcinoma undergoing surgical resection	VLADIMIR PROCHAZKA	Prochazka.Vladimir@fnbrno.cz	Czech Republic	Supported by Ministry of Health of the Czech Republic, grant No. 16-31314A. All rights reserved.	None Declared	Yes	Prospective	Plasma	Prior to surgery or treatment			PDAC	Yes	1	Novel	miR-126-5p	Single marker		PDAC vs Healthy	25	11	14					no	25 III			24
#656	PMID: 29976637	Pre-operative plasma miR-21-5p is a sensitive biomarker and independent prognostic factor in patients with pancreatic ductal adenocarcinoma undergoing surgical resection	VLADIMIR PROCHAZKA	Prochazka.Vladimir@fnbrno.cz	Czech Republic	Supported by Ministry of Health of the Czech Republic, grant No. 16-31314A. All rights reserved.	None Declared	Yes	Prospective	Plasma	Prior to surgery or treatment			PDAC	Yes	1	Novel	miR-1290	Single marker		PDAC vs Healthy	25	11	14					no	25 III			24
#681	PMID: 24308545	Serum IGFBP2 and MSLN as diagnostic and prognostic biomarkers for pancreatic cancer	Matt Firpo	matt.firpo@hsc.utah.edu	USA	This work was supported in part by research grants from the National Institutes of Health (R03CA115225, U01CA151650, R33CA155586 to SJM and P30CA042014 to the Huntsman Cancer Institute for support of core facilities), grants from the Huntsman Cancer Institute Pancreas Cancer Research Program and through support from the Huntsman Cancer Foundation.	None Declared	Yes	Prospective	Serum	Prior to surgery or treatment			PDAC	yes	1	Novel	IGFBP2	Single marker	Yes	PDAC vs Benign	84	44	40	44-87	65.5		Hispathologically	No		no																	144	Combined
#681	PMID: 24308545	Serum IGFBP2 and MSLN as diagnostic and prognostic biomarkers for pancreatic cancer	Matt Firpo	matt.firpo@hsc.utah.edu	USA	This work was supported in part by research grants from the National Institutes of Health (R03CA115225, U01CA151650, R33CA155586 to SJM and P30CA042014 to the Huntsman Cancer Institute for support of core facilities), grants from the Huntsman Cancer Institute Pancreas Cancer Research Program and through support from the Huntsman Cancer Foundation.	None Declared	Yes	Prospective	Serum	Prior to surgery or treatment			PDAC	yes	1	Novel	MSLN	Single marker	Yes	PDAC vs Benign	84	44	40	44-87	65.5		Hispathologically	No		no																	144	Combined
#681	PMID: 24308545	Serum IGFBP2 and MSLN as diagnostic and prognostic biomarkers for pancreatic cancer	Matt Firpo	matt.firpo@hsc.utah.edu	USA	This work was supported in part by research grants from the National Institutes of Health (R03CA115225, U01CA151650, R33CA155586 to SJM and P30CA042014 to the Huntsman Cancer Institute for support of core facilities), grants from the Huntsman Cancer Institute Pancreas Cancer Research Program and through support from the Huntsman Cancer Foundation.	None Declared	Yes	Prospective	Serum	Prior to surgery or treatment			PDAC	yes	1	CA19-9	CA19-9	Single marker	Yes	PDAC vs Benign	84	44	40	44-87	65.5		Hispathologically	No		no																	144	Combined
#681	PMID: 24308545	Serum IGFBP2 and MSLN as diagnostic and prognostic biomarkers for pancreatic cancer	Matt Firpo	matt.firpo@hsc.utah.edu	USA	This work was supported in part by research grants from the National Institutes of Health (R03CA115225, U01CA151650, R33CA155586 to SJM and P30CA042014 to the Huntsman Cancer Institute for support of core facilities), grants from the Huntsman Cancer Institute Pancreas Cancer Research Program and through support from the Huntsman Cancer Foundation.	None Declared	Yes	Prospective	Serum	Prior to surgery or treatment			PDAC	yes	1	Novel	IGFBP2	Single marker	Yes	PDAC vs Healthy	84	44	40	44-87	65.5		Hispathologically	No		no		84	44	40				age matched
#681	PMID: 24308545	Serum IGFBP2 and MSLN as diagnostic and prognostic biomarkers for pancreatic cancer	Matt Firpo	matt.firpo@hsc.utah.edu	USA	This work was supported in part by research grants from the National Institutes of Health (R03CA115225, U01CA151650, R33CA155586 to SJM and P30CA042014 to the Huntsman Cancer Institute for support of core facilities), grants from the Huntsman Cancer Institute Pancreas Cancer Research Program and through support from the Huntsman Cancer Foundation.	None Declared	Yes	Prospective	Serum	Prior to surgery or treatment			PDAC	yes	1	Novel	IGFBP2	Single marker	Yes	PDAC vs Benign	84	44	40	44-87	65.5		Hispathologically	No		no									40	Chronic pancreaetitis	20	20	29-80	50
#681	PMID: 24308545	Serum IGFBP2 and MSLN as diagnostic and prognostic biomarkers for pancreatic cancer	Matt Firpo	matt.firpo@hsc.utah.edu	USA	This work was supported in part by research grants from the National Institutes of Health (R03CA115225, U01CA151650, R33CA155586 to SJM and P30CA042014 to the Huntsman Cancer Institute for support of core facilities), grants from the Huntsman Cancer Institute Pancreas Cancer Research Program and through support from the Huntsman Cancer Foundation.	None Declared	Yes	Prospective	Serum	Prior to surgery or treatment			PDAC	yes	1	Novel	MSLN	Single marker	Yes	PDAC vs Healthy	84	44	40	44-87	65.5		Hispathologically	No		no		84	44	40				age matched
#681	PMID: 24308545	Serum IGFBP2 and MSLN as diagnostic and prognostic biomarkers for pancreatic cancer	Matt Firpo	matt.firpo@hsc.utah.edu	USA	This work was supported in part by research grants from the National Institutes of Health (R03CA115225, U01CA151650, R33CA155586 to SJM and P30CA042014 to the Huntsman Cancer Institute for support of core facilities), grants from the Huntsman Cancer Institute Pancreas Cancer Research Program and through support from the Huntsman Cancer Foundation.	None Declared	Yes	Prospective	Serum	Prior to surgery or treatment			PDAC	yes	1	Novel	MSLN	Single marker	Yes	PDAC vs Benign	84	44	40	44-87	65.5		Hispathologically	No		no									40	Chronic pancreaetitis	20	20	29-80	50
#4579	PMID: 24741628	Increased levels of granulocytic myeloid-derived suppressor cells in peripheral blood and tumour tissue of pancreatic cancer patients	Eyad Elkord	eelkord@uaeu.ac.ae	UK	Not given	None Declared	Yes	Prospective	Whole Blood	Prior to surgery or treatment			PDAC	no	4	Novel	MDSC (subset: Lin-HLA-DR-CD33+11b+CD15+)	Multi-marker panel		PDAC vs Healthy	24	13	11	41-85	64.5		hispathologically	No	I0 II 6 III 1 IV 17	no		16	7	9	24-89	51
#4579	PMID: 24741628	Increased levels of granulocytic myeloid-derived suppressor cells in peripheral blood and tumour tissue of pancreatic cancer patients	Eyad Elkord	eelkord@uaeu.ac.ae	UK	Not given	None Declared	Yes	Prospective	Whole Blood	Prior to surgery or treatment			PDAC	no	4	Novel	MDSC (subset: Lin-HLA-DR-CD33+11b+CD15+)	Multi-marker panel		PDAC vs Benign	24	13	11	41-85	64.5		hispathologically	No	I0 II 6 III 1 IV 17	no									12	Chronic pancreatitis	5	7	23-72	49
#3092	PMID: 25194335	Utility of serum IgG, IgG4 and carbonic anhydrase II antibodies in distinguishing autoimmune pancreatitis from pancreatic cancer and chronic pancreatitis	Renata Talar-Wojnarowska	r-wojnarowska@wp.pl	Poland	Not given	None Declared	Yes	Prospective	Serum	At time of hospitalisation			PDAC	Yes	1	Novel	IgG	Single marker		PDAC vs Benign	45	22	23			71	histologically	unclear		no									24	Autoimmune pancreatitis	9	15			64
#3092	PMID: 25194335	Utility of serum IgG, IgG4 and carbonic anhydrase II antibodies in distinguishing autoimmune pancreatitis from pancreatic cancer and chronic pancreatitis	Renata Talar-Wojnarowska	r-wojnarowska@wp.pl	Poland	Not given	None Declared	Yes	Prospective	Serum	At time of hospitalisation			PDAC	Yes	1	Novel	anti-CAIIAb	Single marker		PDAC vs Benign	45	22	23			71	histologically	unclear		no									24	Autoimmune pancreatitis	9	15			64
#3092	PMID: 25194335	Utility of serum IgG, IgG4 and carbonic anhydrase II antibodies in distinguishing autoimmune pancreatitis from pancreatic cancer and chronic pancreatitis	Renata Talar-Wojnarowska	r-wojnarowska@wp.pl	Poland	Not given	None Declared	Yes	Prospective	Serum	At time of hospitalisation	2012-04-01	2013-01-01	PDAC	Yes	1	Novel	IgG4	Single marker		PDAC vs Benign	45	22	23			71	histologically	unclear		no									24	Autoimmune pancreatitis	9	15			64
#2180	PMID: 30905814	Vimentin-positive circulating tumor cells as a biomarker for diagnosis and treatment monitoring in patients with pancreatic cancer	Tiangbo Liang	liangtingbo@zju.edu.cn	China	This work was supported by the National High Technology Research and Development Program of China [grant number SS2015AA020405]; the National Natural Science Foundation of China [grant numbers 81802359, 81672337, 81530079, 81702332]; and the Key Research and Development Project of Zhejiang Province [grant number 2015C03044].	None Declared	Yes	Prospective	whole Blood	No details given	2012-04-01	2013-01-01	PDAC	Yes	7	CA19-9	vimentin+/CD45−/Hoechst+ or Pan-CK+/CD45−/Hoechst & CA19-9	Multi-marker panel		PDAC vs Benign	100	60	40	43-90	64		histologically	No	I-8, II- 31, III-22, IV-39	no									46	IPMN and Healthy controls
#2180	PMID: 30905814	Vimentin-positive circulating tumor cells as a biomarker for diagnosis and treatment monitoring in patients with pancreatic cancer	Tiangbo Liang	liangtingbo@zju.edu.cn	China	This work was supported by the National High Technology Research and Development Program of China [grant number SS2015AA020405]; the National Natural Science Foundation of China [grant numbers 81802359, 81672337, 81530079, 81702332]; and the Key Research and Development Project of Zhejiang Province [grant number 2015C03044].	None Declared	Yes	Prospective	whole Blood	No details given			PDAC	Yes	6	Novel	vimentin+CD45−Hoechst+ or Pan-CK+CD45−Hoechst	Multi-marker panel		PDAC vs Benign	100	60	40	43-90	64		histologically	No	I-8, II- 31, III-22, IV-39	no																	16	IPMN
#2180	PMID: 30905814	Vimentin-positive circulating tumor cells as a biomarker for diagnosis and treatment monitoring in patients with pancreatic cancer	Tiangbo Liang	liangtingbo@zju.edu.cn	China	This work was supported by the National High Technology Research and Development Program of China [grant number SS2015AA020405]; the National Natural Science Foundation of China [grant numbers 81802359, 81672337, 81530079, 81702332]; and the Key Research and Development Project of Zhejiang Province [grant number 2015C03044].	None Declared	Yes	Prospective	whole Blood	No details given			PDAC	Yes	6	Novel	vimentin+CD45−Hoechst+ or Pan-CK+CD45−Hoechst	Multi-marker panel		PDAC vs Healthy	100	60	40	43-91	65		histologically	No	I-8, II- 31, III-22, IV-40	no		30
#274	PMID: 20003342	Identification of a biomarker panel using a multiplex proximity ligation assay improves accuracy of pancreatic cancer diagnosis	Albert C Koong	akoong@stanford.edu	USA	STC was supported by the University of California, San Francisco (UCSF) Dean's Summer Research Fellowship. DTC, HJ, and ACK received support from the Cha Family Foundation. QTL and ACK received support from the National Institutes of Health (PO1 CA67166).	None Declared	Yes	Prospective	Plasma	after treatment			PDAC	yes	3	CA19-9	CA19-9 & OPN & CHI3L1	Multi-marker panel		PDAC vs Healthy	52			37-84	68		histologically	no		yes	gemcitabine +/- radiotherapy	43						Age matched
#274	PMID: 20003342	Identification of a biomarker panel using a multiplex proximity ligation assay improves accuracy of pancreatic cancer diagnosis	Albert C Koong	akoong@stanford.edu	USA	STC was supported by the University of California, San Francisco (UCSF) Dean's Summer Research Fellowship. DTC, HJ, and ACK received support from the Cha Family Foundation. QTL and ACK received support from the National Institutes of Health (PO1 CA67166).	None Declared	Yes	Prospective	Plasma	after treatment	2016-12-01	2017-11-01	PDAC	yes	1	CA19-9	CA19-9	Single marker		PDAC vs Healthy	52			37-84	68		histologically	no		yes	gemcitabine +/- radiotherapy	43						Age matched
#274	PMID: 20003342	Identification of a biomarker panel using a multiplex proximity ligation assay improves accuracy of pancreatic cancer diagnosis	Albert C Koong	akoong@stanford.edu	USA	STC was supported by the University of California, San Francisco (UCSF) Dean's Summer Research Fellowship. DTC, HJ, and ACK received support from the Cha Family Foundation. QTL and ACK received support from the National Institutes of Health (PO1 CA67166).	None Declared	Yes	Prospective	Plasma	after treatment	2016-12-01	2017-11-01	PDAC	yes	1	Novel	OPN	Single marker		PDAC vs Healthy	53			37-85	69		histologically	no		yes	gemcitabine +/- radiotherapy	44						Age matched
#274	PMID: 20003342	Identification of a biomarker panel using a multiplex proximity ligation assay improves accuracy of pancreatic cancer diagnosis	Albert C Koong	akoong@stanford.edu	USA	STC was supported by the University of California, San Francisco (UCSF) Dean's Summer Research Fellowship. DTC, HJ, and ACK received support from the Cha Family Foundation. QTL and ACK received support from the National Institutes of Health (PO1 CA67166).	None Declared	Yes	Prospective	Plasma	after treatment	2016-12-01	2017-11-01	PDAC	yes	1	CA19-9	CA19-9	Single marker		PDAC vs Healthy	54			37-86	70		histologically	no		yes	gemcitabine +/- radiotherapy	45						Age matched
#274	PMID: 20003342	Identification of a biomarker panel using a multiplex proximity ligation assay improves accuracy of pancreatic cancer diagnosis	Albert C Koong	akoong@stanford.edu	USA	STC was supported by the University of California, San Francisco (UCSF) Dean's Summer Research Fellowship. DTC, HJ, and ACK received support from the Cha Family Foundation. QTL and ACK received support from the National Institutes of Health (PO1 CA67166).	None Declared	Yes	Prospective	Plasma	after treatment	2002-07-01	2007-05-01	PDAC	yes	1	Novel	CHI3L1	Single marker		PDAC vs Healthy	55			37-87	71		histologically	no		yes	gemcitabine +/- radiotherapy	46						Age matched
#274	PMID: 20003342	Identification of a biomarker panel using a multiplex proximity ligation assay improves accuracy of pancreatic cancer diagnosis	Albert C Koong	akoong@stanford.edu	USA	STC was supported by the University of California, San Francisco (UCSF) Dean's Summer Research Fellowship. DTC, HJ, and ACK received support from the Cha Family Foundation. QTL and ACK received support from the National Institutes of Health (PO1 CA67166).	None Declared	Yes	Prospective	Plasma	after treatment	2002-07-01	2007-05-01	PDAC	yes	1	Novel	CA125	Single marker		PDAC vs Healthy	56			37-88	72		histologically	no		yes	gemcitabine +/- radiotherapy	47						Age matched
#274	PMID: 20003342	Identification of a biomarker panel using a multiplex proximity ligation assay improves accuracy of pancreatic cancer diagnosis	Albert C Koong	akoong@stanford.edu	USA	STC was supported by the University of California, San Francisco (UCSF) Dean's Summer Research Fellowship. DTC, HJ, and ACK received support from the Cha Family Foundation. QTL and ACK received support from the National Institutes of Health (PO1 CA67166).	None Declared	Yes	Prospective	Plasma	after treatment	2002-07-01	2007-05-01	PDAC	yes	1	Novel	CEA	Single marker		PDAC vs Healthy	57			37-89	73		histologically	no		yes	gemcitabine +/- radiotherapy	48						Age matched
#274	PMID: 20003342	Identification of a biomarker panel using a multiplex proximity ligation assay improves accuracy of pancreatic cancer diagnosis	Albert C Koong	akoong@stanford.edu	USA	STC was supported by the University of California, San Francisco (UCSF) Dean's Summer Research Fellowship. DTC, HJ, and ACK received support from the Cha Family Foundation. QTL and ACK received support from the National Institutes of Health (PO1 CA67166).	None Declared	Yes	Prospective	Plasma	after treatment	2002-07-01	2007-05-01	PDAC	yes	1	Novel	VEGF	Single marker		PDAC vs Healthy	58			37-90	74		histologically	no		yes	gemcitabine +/- radiotherapy	49						Age matched
#274	PMID: 20003342	Identification of a biomarker panel using a multiplex proximity ligation assay improves accuracy of pancreatic cancer diagnosis	Albert C Koong	akoong@stanford.edu	USA	STC was supported by the University of California, San Francisco (UCSF) Dean's Summer Research Fellowship. DTC, HJ, and ACK received support from the Cha Family Foundation. QTL and ACK received support from the National Institutes of Health (PO1 CA67166).	None Declared	Yes	Prospective	Plasma	after treatment	2002-07-01	2007-05-01	PDAC	yes	1	Novel	MESO	Single marker		PDAC vs Healthy	59			37-91	75		histologically	no		yes	gemcitabine +/- radiotherapy	50						Age matched
#274	PMID: 20003342	Identification of a biomarker panel using a multiplex proximity ligation assay improves accuracy of pancreatic cancer diagnosis	Albert C Koong	akoong@stanford.edu	USA	STC was supported by the University of California, San Francisco (UCSF) Dean's Summer Research Fellowship. DTC, HJ, and ACK received support from the Cha Family Foundation. QTL and ACK received support from the National Institutes of Health (PO1 CA67166).	None Declared	Yes	Prospective	Plasma	after treatment	2002-07-01	2007-05-01	PDAC	yes	1	Novel	IGF2	Single marker		PDAC vs Healthy	60			37-92	76		histologically	no		yes	gemcitabine +/- radiotherapy	51						Age matched
#274	PMID: 20003342	Identification of a biomarker panel using a multiplex proximity ligation assay improves accuracy of pancreatic cancer diagnosis	Albert C Koong	akoong@stanford.edu	USA	STC was supported by the University of California, San Francisco (UCSF) Dean's Summer Research Fellowship. DTC, HJ, and ACK received support from the Cha Family Foundation. QTL and ACK received support from the National Institutes of Health (PO1 CA67166).	None Declared	Yes	Prospective	Plasma	after treatment	2002-07-01	2007-05-01	PDAC	yes	1	Novel	IL-7	Single marker		PDAC vs Healthy	61			37-93	77		histologically	no		yes	gemcitabine +/- radiotherapy	52						Age matched
#274	PMID: 20003342	Identification of a biomarker panel using a multiplex proximity ligation assay improves accuracy of pancreatic cancer diagnosis	Albert C Koong	akoong@stanford.edu	USA	STC was supported by the University of California, San Francisco (UCSF) Dean's Summer Research Fellowship. DTC, HJ, and ACK received support from the Cha Family Foundation. QTL and ACK received support from the National Institutes of Health (PO1 CA67166).	None Declared	Yes	Prospective	Plasma	after treatment	2002-07-01	2007-05-01	PDAC	yes	1	Novel	MIF	Single marker		PDAC vs Healthy	62			37-94	78		histologically	no		yes	gemcitabine +/- radiotherapy	53						Age matched
#274	PMID: 20003342	Identification of a biomarker panel using a multiplex proximity ligation assay improves accuracy of pancreatic cancer diagnosis	Albert C Koong	akoong@stanford.edu	USA	STC was supported by the University of California, San Francisco (UCSF) Dean's Summer Research Fellowship. DTC, HJ, and ACK received support from the Cha Family Foundation. QTL and ACK received support from the National Institutes of Health (PO1 CA67166).	None Declared	Yes	Prospective	Plasma	after treatment	2002-07-01	2007-05-01	PDAC	yes	1	Novel	ERBB2	Single marker		PDAC vs Healthy	63			37-95	79		histologically	no		yes	gemcitabine +/- radiotherapy	54						Age matched
#274	PMID: 20003342	Identification of a biomarker panel using a multiplex proximity ligation assay improves accuracy of pancreatic cancer diagnosis	Albert C Koong	akoong@stanford.edu	USA	STC was supported by the University of California, San Francisco (UCSF) Dean's Summer Research Fellowship. DTC, HJ, and ACK received support from the Cha Family Foundation. QTL and ACK received support from the National Institutes of Health (PO1 CA67166).	None Declared	Yes	Prospective	Plasma	after treatment	2002-07-01	2007-05-01	PDAC	yes	1	Novel	EpCam	Single marker		PDAC vs Healthy	64			37-96	80		histologically	no		yes	gemcitabine +/- radiotherapy	55						Age matched
#274	PMID: 20003342	Identification of a biomarker panel using a multiplex proximity ligation assay improves accuracy of pancreatic cancer diagnosis	Albert C Koong	akoong@stanford.edu	USA	STC was supported by the University of California, San Francisco (UCSF) Dean's Summer Research Fellowship. DTC, HJ, and ACK received support from the Cha Family Foundation. QTL and ACK received support from the National Institutes of Health (PO1 CA67166).	None Declared	Yes	Prospective	Plasma	after treatment	2002-07-01	2007-05-01	PDAC	yes	1	Novel	EGFR	Single marker		PDAC vs Healthy	65			37-97	81		histologically	no		yes	gemcitabine +/- radiotherapy	56						Age matched
#1417	PMID: 27733327	Serum tumor markers not useful in screening patients with pancreatic mucinous cystic lesions associated with malignant changes	Raffaele Pezzilli	raffaele.pezzilli@aosp.bo.it	Italy	Not given	Not mentioned	Yes	Unsure	Serum	No details given			PDAC	Yes	1	CA19-9	CA19-9	Single marker	Yes	PDAC vs Benign	24	14	10	not broken down into subgroups			not stated		not stated	Unsure		Not included							35	Chronic pancreatitis	26	9	Not given
#1417	PMID: 27733327	Serum tumor markers not useful in screening patients with pancreatic mucinous cystic lesions associated with malignant changes	Raffaele Pezzilli	raffaele.pezzilli@aosp.bo.it	Italy	Not given	Not mentioned	Yes	Unsure	Serum	No details given			PDAC	Yes	1	CA19-9	CA19-9	Single marker	Yes	PDAC vs Benign	24	14	10	not broken down into subgroups			not stated		not stated	Unsure																	32	Other
#1417	PMID: 27733327	Serum tumor markers not useful in screening patients with pancreatic mucinous cystic lesions associated with malignant changes	Raffaele Pezzilli	raffaele.pezzilli@aosp.bo.it	Italy	Not given	Not mentioned	Yes	Unsure	Serum	No details given			PDAC	Yes	1	Novel	CEA	Single marker	Yes	PDAC vs Benign	24	14	10	not broken down into subgroups			not stated		not stated	Unsure									35	Chronic pancreatitis	26	9	Not given
#1417	PMID: 27733327	Serum tumor markers not useful in screening patients with pancreatic mucinous cystic lesions associated with malignant changes	Raffaele Pezzilli	raffaele.pezzilli@aosp.bo.it	Italy	Not given	Not mentioned	Yes	Unsure	Serum	No details given			PDAC	Yes	1	Novel	CEA	Single marker	Yes	PDAC vs Benign	24	14	10	not broken down into subgroups			not stated		not stated	Unsure																	32	Other
#619	PMID: 19775290	Identification of serum biomarkers for pancreatic adenocarcinoma by proteomic analysis	Shuncai Zhang	doctorzhangsc@163.com	China	Science and Technology Commissionof Shanghai Municipality in China (no. 05JC14013)	Not mentioned	Yes	Prospective	Serum	Prior to cyst puncture by Surgery	2006-12-01	2008-02-01	PDAC	Yes	1	Novel	C14orf166	Single marker	No	PDAC vs Mixed	58	36	21			63.1		No	Stage I (5), Stage II (31), Stage III (6), Stage IV (16)	No		51	31	20			60.96		18	Other	6	12			46.44	Chronic pancreatitis (2), Mucinous cystadenoma (5), Serous cystadenoma (4), Solid-pseudopapillary neoplasm (5), Pseudocyst (2)
#619	PMID: 19775290	Identification of serum biomarkers for pancreatic adenocarcinoma by proteomic analysis	Shuncai Zhang	doctorzhangsc@163.com	China	Science and Technology Commissionof Shanghai Municipality in China (no. 05JC14013)	Not mentioned	Yes	Prospective	Serum	Prior to cyst puncture by Surgery	2006-12-01	2008-02-01	PDAC	Yes	1	Novel	C14orf166	Single marker	No	PDAC vs Healthy	58	36	21			63.1		No	Stage I (5), Stage II (31), Stage III (6), Stage IV (16)	No		51	31	20			60.96
#619	PMID: 19775290	Identification of serum biomarkers for pancreatic adenocarcinoma by proteomic analysis	Shuncai Zhang	doctorzhangsc@163.com	China	Science and Technology Commissionof Shanghai Municipality in China (no. 05JC14013)	Not mentioned	Yes	Prospective	Serum	Prior to cyst puncture by Surgery	2006-12-01	2008-02-01	PDAC	Yes	1	Novel	C14orf166	Single marker	No	PDAC vs Benign	58	36	21			63.1		No	Stage I (5), Stage II (31), Stage III (6), Stage IV (16)	No									18	Other	6	12			46.44	Chronic pancreatitis (2), Mucinous cystadenoma (5), Serous cystadenoma (4), Solid-pseudopapillary neoplasm (5), Pseudocyst (2)
#2411	PMID: 30358133	High levels of serum glypican-1 indicate poor prognosis in pancreatic ductal adenocarcinoma	Qing Zhu	newzhuqing1972@yahoo.com	China	National Natural Science Foundation of China 81672921 and Innovation Capacity Support Plan of Shaanxi Province 2018TD‐002	Not mentioned	Yes	Prospective	Serum	Before Treatment	2011-10-01	2017-03-01	PDAC	Yes	1	Novel	GPC1	Single marker	Yes	PDAC vs Healthy	156	93	63	36 - 84		62.7	Histology	No	Stage I 23, Stage II 49, Stage III 25, Stage IV 59	No		163	95	68	> 60 n= 83, ≤ 60 years n= 73			stated age and gender matched
#2411	PMID: 30358133	High levels of serum glypican-1 indicate poor prognosis in pancreatic ductal adenocarcinoma	Qing Zhu	newzhuqing1972@yahoo.com	China	National Natural Science Foundation of China 81672921 and Innovation Capacity Support Plan of Shaanxi Province 2018TD‐002	Not mentioned	Yes	Prospective	Serum	Before Treatment	2011-10-01	2017-03-01	PDAC	Yes	1	CA19-9	CA19-9	Single marker	Yes	PDAC vs Healthy	156	93	63	37 - 84		62.7	Histology	No	Stage I 23, Stage II 49, Stage III 25, Stage IV 60	No		163	95	68	> 60 n= 83, ≤ 60 years n= 74			stated age and gender matched
#2411	PMID: 30358133	High levels of serum glypican-1 indicate poor prognosis in pancreatic ductal adenocarcinoma	Qing Zhu	newzhuqing1972@yahoo.com	China	National Natural Science Foundation of China 81672921 and Innovation Capacity Support Plan of Shaanxi Province 2018TD‐002	Not mentioned	Yes	Prospective	Serum	Before Treatment	2011-10-01	2017-03-01	PDAC	Yes	2	CA19-9	GPC-1 & CA19-9	Multi-marker panel	Yes	PDAC vs Healthy	156	93	63	38 - 84		62.7	Histology	No	Stage I 23, Stage II 49, Stage III 25, Stage IV 61	No		163	95	68	> 60 n= 83, ≤ 60 years n= 75			stated age and gender matched
#2411	PMID: 30358133	High levels of serum glypican-1 indicate poor prognosis in pancreatic ductal adenocarcinoma	Qing Zhu	newzhuqing1972@yahoo.com	China	National Natural Science Foundation of China 81672921 and Innovation Capacity Support Plan of Shaanxi Province 2018TD‐002	Not mentioned	Yes	Prospective	Serum	Before Treatment	2011-10-01	2017-03-01	PDAC	Yes	1	Novel	GPC1	Single marker	Yes	PDAC vs Healthy	72						Histology	No	Stage I 23, Stage II 49	No		163	95	68	> 60 n= 83, ≤ 60 years n= 76			stated age and gender matched
#2411	PMID: 30358133	High levels of serum glypican-1 indicate poor prognosis in pancreatic ductal adenocarcinoma	Qing Zhu	newzhuqing1972@yahoo.com	China	National Natural Science Foundation of China 81672921 and Innovation Capacity Support Plan of Shaanxi Province 2018TD‐002	Not mentioned	Yes	Prospective	Serum	Before Treatment	2011-10-01	2017-03-01	PDAC	Yes	1	CA19-9	CA19-9	Single marker	Yes	PDAC vs Healthy	72						Histology	No	Stage I 23, Stage II 50	No		163	95	68	> 60 n= 83, ≤ 60 years n= 77			stated age and gender matched
#2411	PMID: 30358133	High levels of serum glypican-1 indicate poor prognosis in pancreatic ductal adenocarcinoma	Qing Zhu	newzhuqing1972@yahoo.com	China	National Natural Science Foundation of China 81672921 and Innovation Capacity Support Plan of Shaanxi Province 2018TD‐003	Not mentioned	Yes	Prospective	Serum	Before Treatment	2011-10-02	2017-03-02	PDAC	Yes	2	CA19-9	GPC-1 & CA19-9	Multi-marker panel	Yes	PDAC vs Healthy	72						Histology	No	Stage I 23, Stage II 51	No		163	95	68	> 60 n= 83, ≤ 60 years n= 78			stated age and gender matched
#2411	PMID: 30358133	High levels of serum glypican-1 indicate poor prognosis in pancreatic ductal adenocarcinoma	Qing Zhu	newzhuqing1972@yahoo.com	China	National Natural Science Foundation of China 81672921 and Innovation Capacity Support Plan of Shaanxi Province 2018TD‐004	Not mentioned	Yes	Prospective	Serum	Before Treatment	2011-10-03	2017-03-03	PDAC	Yes	1	Novel	GPC-1	Single marker	Yes	PDAC vs Mixed	156	93	63	38 - 84		62.7	Histology	No	Stage I 23, Stage II 49, Stage III 25, Stage IV 61	No		163	95	68	> 60 n= 83, ≤ 60 years n= 79			stated age and gender matched	16	Chronic pancreatitis	16	0	> 60 (n=4), ≤ n=16				20	Other
#2411	PMID: 30358133	High levels of serum glypican-1 indicate poor prognosis in pancreatic ductal adenocarcinoma	Qing Zhu	newzhuqing1972@yahoo.com	China	National Natural Science Foundation of China 81672921 and Innovation Capacity Support Plan of Shaanxi Province 2018TD‐005	Not mentioned	Yes	Prospective	Serum	Before Treatment	2011-10-04	2017-03-04	PDAC	Yes	1	CA19-9	CA19-9	Single marker	Yes	PDAC vs Mixed	156	93	63	38 - 84		62.7	Histology	No	Stage I 23, Stage II 49, Stage III 25, Stage IV 61	No		163	95	68	> 60 n= 83, ≤ 60 years n= 80			stated age and gender matched	16	Chronic pancreatitis	16	0	> 60 (n=4), ≤ n=17				20	Other
#2411	PMID: 30358133	High levels of serum glypican-1 indicate poor prognosis in pancreatic ductal adenocarcinoma	Qing Zhu	newzhuqing1972@yahoo.com	China	National Natural Science Foundation of China 81672921 and Innovation Capacity Support Plan of Shaanxi Province 2018TD‐006	Not mentioned	Yes	Prospective	Serum	Before Treatment	2011-10-05	2017-03-05	PDAC	Yes	2	CA19-9	GPC-1 & CA19-9	Multi-marker panel	Yes	PDAC vs Mixed	156	93	63	38 - 84		62.7	Histology	No	Stage I 23, Stage II 49, Stage III 25, Stage IV 61	No		163	95	68	> 60 n= 83, ≤ 60 years n= 81			stated age and gender matched	16	Chronic pancreatitis	16	0	> 60 (n=4), ≤ n=18				20	Other
#2411	PMID: 30358133	High levels of serum glypican-1 indicate poor prognosis in pancreatic ductal adenocarcinoma	Qing Zhu	newzhuqing1972@yahoo.com	China	National Natural Science Foundation of China 81672921 and Innovation Capacity Support Plan of Shaanxi Province 2018TD‐007	Not mentioned	Yes	Prospective	Serum	Before Treatment	2011-10-06	2017-03-06	PDAC	Yes	1	Novel	GPC-1	Single marker	Yes	PDAC vs Mixed	72						Histology	No	Stage I 23, Stage II 49	No		163	95	68	> 60 n= 83, ≤ 60 years n= 82			stated age and gender matched	16	Chronic pancreatitis	16	0	> 60 (n=4), ≤ n=19				20	Other
#2411	PMID: 30358133	High levels of serum glypican-1 indicate poor prognosis in pancreatic ductal adenocarcinoma	Qing Zhu	newzhuqing1972@yahoo.com	China	National Natural Science Foundation of China 81672921 and Innovation Capacity Support Plan of Shaanxi Province 2018TD‐008	Not mentioned	Yes	Prospective	Serum	Before Treatment	2011-10-07	2017-03-07	PDAC	Yes	1	CA19-9	CA19-9	Single marker	Yes	PDAC vs Mixed	72						Histology	No	Stage I 23, Stage II 50	No		163	95	68	> 60 n= 83, ≤ 60 years n= 83			stated age and gender matched	16	Chronic pancreatitis	16	0	> 60 (n=4), ≤ n=20				20	Other
#2411	PMID: 30358133	High levels of serum glypican-1 indicate poor prognosis in pancreatic ductal adenocarcinoma	Qing Zhu	newzhuqing1972@yahoo.com	China	National Natural Science Foundation of China 81672921 and Innovation Capacity Support Plan of Shaanxi Province 2018TD‐009	Not mentioned	Yes	Prospective	Serum	Before Treatment	2011-10-08	2017-03-08	PDAC	Yes	2	CA19-9	GPC-1 & CA19-9	Multi-marker panel	Yes	PDAC vs Mixed	72						Histology	No	Stage I 23, Stage II 51	No		163	95	68	> 60 n= 83, ≤ 60 years n= 84			stated age and gender matched	16	Chronic pancreatitis	16	0	> 60 (n=4), ≤ n=21				20	Other
#2411	PMID: 30358133	High levels of serum glypican-1 indicate poor prognosis in pancreatic ductal adenocarcinoma	Qing Zhu	newzhuqing1972@yahoo.com	China	National Natural Science Foundation of China 81672921 and Innovation Capacity Support Plan of Shaanxi Province 2018TD‐010	Not mentioned	Yes	Prospective	Serum	Before Treatment	2011-10-09	2017-03-09	PDAC	Yes	1	Novel	GPC1	Single marker	Yes	PDAC vs Benign	156	93	63	38 - 84		62.7	Histology	No	Stage I 23, Stage II 49, Stage III 25, Stage IV 61	No									16	Chronic pancreatitis	16	0	> 60 (n=4), ≤ n=22
#2411	PMID: 30358133	High levels of serum glypican-1 indicate poor prognosis in pancreatic ductal adenocarcinoma	Qing Zhu	newzhuqing1972@yahoo.com	China	National Natural Science Foundation of China 81672921 and Innovation Capacity Support Plan of Shaanxi Province 2018TD‐011	Not mentioned	Yes	Prospective	Serum	Before Treatment	2011-10-10	2017-03-10	PDAC	Yes	1	CA19-9	CA19-9	Single marker	Yes	PDAC vs Benign	156	93	63	38 - 84		62.7	Histology	No	Stage I 23, Stage II 49, Stage III 25, Stage IV 61	No									16	Chronic pancreatitis	16	0	> 60 (n=4), ≤ n=23
#2411	PMID: 30358133	High levels of serum glypican-1 indicate poor prognosis in pancreatic ductal adenocarcinoma	Qing Zhu	newzhuqing1972@yahoo.com	China	National Natural Science Foundation of China 81672921 and Innovation Capacity Support Plan of Shaanxi Province 2018TD‐014	Not mentioned	Yes	Prospective	Serum	Before Treatment	2011-10-13	2017-03-13	PDAC	Yes	1	Novel	GPC1	Single marker	Yes	PDAC vs Healthy	23						Histology	No	Stage I 23	No		163	95	68	> 60 n= 83, ≤ 60 years n= 84			stated age and gender matched
#2411	PMID: 30358133	High levels of serum glypican-1 indicate poor prognosis in pancreatic ductal adenocarcinoma	Qing Zhu	newzhuqing1972@yahoo.com	China	National Natural Science Foundation of China 81672921 and Innovation Capacity Support Plan of Shaanxi Province 2018TD‐015	Not mentioned	Yes	Prospective	Serum	Before Treatment	2011-10-14	2017-03-14	PDAC	Yes	1	CA19-9	CA19-9	Single marker	Yes	PDAC vs Healthy	24						Histology	No	Stage I 24	No		163	95	68	> 60 n= 83, ≤ 60 years n= 84			stated age and gender matched
#544	PMID: 25202052	Serum EpCAM expression in pancreatic cancer	Florian Gebauer	fgebauer@uke.uni-hamburg.de	Germany	Not given	Not mentioned	Yes	Prospective	Serum	Before Surgery	2003	2009	PDAC	No	1	Novel	EpCAM	Single marker	Yes	PDAC vs Mixed	66	40	26	N=37 <65 Years, n= 29 >65 years	62		not stated	No	T-Stage ( pT1 n=4, pT2 n=8, pT3 n=43, pT4 n=11)	No		104							43	Chronic pancreatitis	30	13
#2023	PMID: 23579209	ITRAQ reveals candidate pancreatic cancer serum biomarkers: Influence of obstructive jaundice on their performance	E Costello	ecostell@liverpool.ac.uk	UK & Germany	This work was supported by Cancer Research UK, grant A12790 and the National Institute for Health Research Pancreatic Biomedical Research Unit.	Not mentioned	Yes	Prospective	Serum	Prior to cyst puncture by Surgery			PDAC	Yes	1	Novel	a1-b glycoprotein (A1BG)	Single marker	No	PDAC vs Healthy	49	26	23				Histology	No	T1N1 (1), T2N0 (2), T2N1(1), T3N0 (1), T3N1 (28), Bypass (3), Unknown (6)	No		15	8	7		45
#2023	PMID: 23579209	ITRAQ reveals candidate pancreatic cancer serum biomarkers: Influence of obstructive jaundice on their performance	E Costello	ecostell@liverpool.ac.uk	UK & Germany	This work was supported by Cancer Research UK, grant A12790 and the National Institute for Health Research Pancreatic Biomedical Research Unit.	Not mentioned	Yes	Prospective	Serum	Prior to cyst puncture by Surgery			PDAC	Yes	1	Novel	Complement C5 (C5)	Single marker	No	PDAC vs Healthy	49	26	23				Histology	No	T1N1 (1), T2N0 (2), T2N1(1), T3N0 (1), T3N1 (28), Bypass (3), Unknown (6)	No		15	8	7		45
#2023	PMID: 23579209	ITRAQ reveals candidate pancreatic cancer serum biomarkers: Influence of obstructive jaundice on their performance	E Costello	ecostell@liverpool.ac.uk	UK & Germany	This work was supported by Cancer Research UK, grant A12790 and the National Institute for Health Research Pancreatic Biomedical Research Unit.	Not mentioned	Yes	Prospective	Serum	Prior to cyst puncture by Surgery			PDAC	Yes	1	Novel	Inter-a-trypsin inhibitor heavy chain H3 (ITIH3)	Single marker	No	PDAC vs Healthy	49	26	23				Histology	No	T1N1 (1), T2N0 (2), T2N1(1), T3N0 (1), T3N1 (28), Bypass (3), Unknown (6)	No		15	8	7		45
#2023	PMID: 23579209	ITRAQ reveals candidate pancreatic cancer serum biomarkers: Influence of obstructive jaundice on their performance	E Costello	ecostell@liverpool.ac.uk	UK & Germany	This work was supported by Cancer Research UK, grant A12790 and the National Institute for Health Research Pancreatic Biomedical Research Unit.	Not mentioned	Yes	Prospective	Serum	Prior to cyst puncture by Surgery			PDAC	Yes	1	CA19-9	CA19-9	Single marker	No	PDAC vs Healthy	49	26	23				Histology	No	T1N1 (1), T2N0 (2), T2N1(1), T3N0 (1), T3N1 (28), Bypass (3), Unknown (6)	No		15	8	7		45
#1490	PMID: 31941049	Potential of exosomal microRNA-200b as liquid biopsy marker in pancreatic ductal adenocarcinoma	Sameer A. Dhayat	sameer.dhayat@ukmuenster.de	Germany	Recieved no external funding	None Declared	Yes	Prospective	Serum exosomes	Before Surgery	2015	2018	PDAC	Yes	1	Novel	miR-200b total seum exosomes	Single marker	Yes	PDAC vs Healthy	56	36	20	26-82			Histology	No	UICC Stage II n=18, STAGE III n=22, Stage III n=16	No		22	11	11	43-87	68
#1490	PMID: 31941049	Potential of exosomal microRNA-200b as liquid biopsy marker in pancreatic ductal adenocarcinoma	Sameer A. Dhayat	sameer.dhayat@ukmuenster.de	Germany	Recieved no external funding	None Declared	Yes	Prospective	Serum exosomes	Before Surgery	2015	2018	PDAC	Yes	1	Novel	miR-200c total serum exosomes	Single marker	Yes	PDAC vs Healthy	56	36	20	26-82			Histology	No	UICC Stage II n=18, STAGE III n=22, Stage III n=16	No		22	11	11	43-87	68
#1490	PMID: 31941049	Potential of exosomal microRNA-200b as liquid biopsy marker in pancreatic ductal adenocarcinoma	Sameer A. Dhayat	sameer.dhayat@ukmuenster.de	Germany	Recieved no external funding	None Declared	Yes	Prospective	Serum exosomes	Before Surgery	2015	2018	PDAC	Yes	1	Novel	miR-200b total serum exosomes	Single marker	Yes	PDAC vs Benign	56	36	20	26-82			Histology	No	UICC Stage II n=18, STAGE III n=22, Stage III n=16	No									11	Chronic pancreatitis	6	5	55-80	62
#1490	PMID: 31941049	Potential of exosomal microRNA-200b as liquid biopsy marker in pancreatic ductal adenocarcinoma	Sameer A. Dhayat	sameer.dhayat@ukmuenster.de	Germany	Recieved no external funding	None Declared	Yes	Prospective	Serum exosomes	Before Surgery	2015	2018	PDAC	Yes	1	Novel	miR-148a total serum exosomes	Single marker	Yes	PDAC vs Benign	56	36	20	26-82			Histology	No	UICC Stage II n=18, STAGE III n=22, Stage III n=16	No									11	Chronic pancreatitis	6	5	55-80	62
#1490	PMID: 31941049	Potential of exosomal microRNA-200b as liquid biopsy marker in pancreatic ductal adenocarcinoma	Sameer A. Dhayat	sameer.dhayat@ukmuenster.de	Germany	Recieved no external funding	None Declared	Yes	Prospective	Serum exosomes	Before Surgery	2015	2018	PDAC	Yes	1	Novel	miR200b total serum exosome	Single marker	Yes	PDAC vs Healthy	18	12	6	53-82	67		Histology	No		No		22	11	11	43-87	68
#1490	PMID: 31941049	Potential of exosomal microRNA-200b as liquid biopsy marker in pancreatic ductal adenocarcinoma	Sameer A. Dhayat	sameer.dhayat@ukmuenster.de	Germany	Recieved no external funding	None Declared	Yes	Prospective	Serum exosomes	Before Surgery	2015	2018	PDAC	Yes	1	Novel	miR200b total serum exosome	Single marker	Yes	PDAC vs Healthy	22	14	8	48-82	70		Histology	No		No		22	11	11	43-87	68
#1490	PMID: 31941049	Potential of exosomal microRNA-200b as liquid biopsy marker in pancreatic ductal adenocarcinoma	Sameer A. Dhayat	sameer.dhayat@ukmuenster.de	Germany	Recieved no external funding	None Declared	Yes	Prospective	Serum exosomes	Before Surgery	2015	2018	PDAC	Yes	1	Novel	miR200b total serum exosome	Single marker	Yes	PDAC vs Healthy	16	10	6	26-78	64		Histology	Yes		No		22	11	11	43-87	68
#1490	PMID: 31941049	Potential of exosomal microRNA-200b as liquid biopsy marker in pancreatic ductal adenocarcinoma	Sameer A. Dhayat	sameer.dhayat@ukmuenster.de	Germany	Recieved no external funding	None Declared	Yes	Prospective	Serum exosomes	Before Surgery	2015	2018	PDAC	Yes	1	Novel	miR200b total serum exosome	Single marker	Yes	PDAC vs Benign	18	12	6	53-82	67		Histology	No		No									11	Chronic pancreatitis	6	5	55-80	62
#1490	PMID: 31941049	Potential of exosomal microRNA-200b as liquid biopsy marker in pancreatic ductal adenocarcinoma	Sameer A. Dhayat	sameer.dhayat@ukmuenster.de	Germany	Recieved no external funding	None Declared	Yes	Prospective	Serum exosomes	Before Surgery	2015	2018	PDAC	Yes	1	Novel	miR200b total serum exosome	Single marker	Yes	PDAC vs Benign	22	14	8	48-82	70		Histology	No		No									11	Chronic pancreatitis	6	5	55-80	62
#1490	PMID: 31941049	Potential of exosomal microRNA-200b as liquid biopsy marker in pancreatic ductal adenocarcinoma	Sameer A. Dhayat	sameer.dhayat@ukmuenster.de	Germany	Recieved no external funding	None Declared	Yes	Prospective	Serum exosomes	Before Surgery	2015	2018	PDAC	Yes	1	Novel	miR200b total serum exosome	Single marker	Yes	PDAC vs Benign	16	10	6	26-78	64		Histology	Yes		No									11	Chronic pancreatitis	6	5	55-80	62
#1490	PMID: 31941049	Potential of exosomal microRNA-200b as liquid biopsy marker in pancreatic ductal adenocarcinoma	Sameer A. Dhayat	sameer.dhayat@ukmuenster.de	Germany	Recieved no external funding	None Declared	Yes	Prospective	Serum exosomes	Before Surgery	2015	2018	PDAC	Yes	2	Novel	miR-200b & EpCAM+ exosome	Multi-marker panel	Yes	PDAC vs Healthy	18	12	6	53-82	67		Histology	No		No		22	11	11	43-87	68
#1490	PMID: 31941049	Potential of exosomal microRNA-200b as liquid biopsy marker in pancreatic ductal adenocarcinoma	Sameer A. Dhayat	sameer.dhayat@ukmuenster.de	Germany	Recieved no external funding	None Declared	Yes	Prospective	Serum exosomes	Before Surgery	2015	2018	PDAC	Yes	2	Novel	miR-200b & EpCAM+ exosome	Multi-marker panel	Yes	PDAC vs Healthy	22	14	8	48-82	70		Histology	No		No		22	11	11	43-87	68
#1490	PMID: 31941049	Potential of exosomal microRNA-200b as liquid biopsy marker in pancreatic ductal adenocarcinoma	Sameer A. Dhayat	sameer.dhayat@ukmuenster.de	Germany	Recieved no external funding	None Declared	Yes	Prospective	Serum exosomes	Before Surgery	2015	2018	PDAC	Yes	2	Novel	miR-200b & EpCAM+ exosome	Multi-marker panel	Yes	PDAC vs Healthy	56	36	20	26-82			Histology	No	UICC Stage II n=18, STAGE III n=22, Stage III n=16	No		22	11	11	43-87	68
#1490	PMID: 31941049	Potential of exosomal microRNA-200b as liquid biopsy marker in pancreatic ductal adenocarcinoma	Sameer A. Dhayat	sameer.dhayat@ukmuenster.de	Germany	Recieved no external funding	None Declared	Yes	Prospective	Serum exosomes	Before Surgery	2015	2018	PDAC	Yes	2	Novel	miR-200c & total serum exosomes	Multi-marker panel	Yes	PDAC vs Healthy	56	36	20	26-82			Histology	No	UICC Stage II n=18, STAGE III n=22, Stage III n=16	No		22	11	11	43-87	68
#1490	PMID: 31941049	Potential of exosomal microRNA-200b as liquid biopsy marker in pancreatic ductal adenocarcinoma	Sameer A. Dhayat	sameer.dhayat@ukmuenster.de	Germany	Recieved no external funding	None Declared	Yes	Prospective	Serum exosomes	Before Surgery	2015	2018	PDAC	Yes	2	Novel	miR-200c & total serum exosomes	Multi-marker panel	Yes	PDAC vs Healthy	22	14	8	48-82	70		Histology	No		No		22	11	11	43-87	68
#1490	PMID: 31941049	Potential of exosomal microRNA-200b as liquid biopsy marker in pancreatic ductal adenocarcinoma	Sameer A. Dhayat	sameer.dhayat@ukmuenster.de	Germany	Recieved no external funding	None Declared	Yes	Prospective	Serum exosomes	Before Surgery	2015	2018	PDAC	Yes	2	Novel	miR-200c & total serum exosomes	Multi-marker panel	Yes	PDAC vs Healthy	16	10	6	26-78	64		Histology	Yes		No		22	11	11	43-87	68
#1490	PMID: 31941049	Potential of exosomal microRNA-200b as liquid biopsy marker in pancreatic ductal adenocarcinoma	Sameer A. Dhayat	sameer.dhayat@ukmuenster.de	Germany	Recieved no external funding	None Declared	Yes	Prospective	Serum exosomes	Before Surgery	2015	2018	PDAC	Yes	3	CA19-9	miR-200b & total serum exosome & CA19-9	Multi-marker panel	Yes	PDAC vs Mixed	56	36	20	26-82			Histology	No	UICC Stage II n=18, STAGE III n=22, Stage III n=16	No		22	11	11	43-87	68			11	Chronic pancreatitis	6	5	55-80	62
#1490	PMID: 31941049	Potential of exosomal microRNA-200b as liquid biopsy marker in pancreatic ductal adenocarcinoma	Sameer A. Dhayat	sameer.dhayat@ukmuenster.de	Germany	Recieved no external funding	None Declared	Yes	Prospective	Serum exosomes	Before Surgery	2015	2018	PDAC	Yes	1	Novel	miR200b total serum exosome	Single marker	Yes	PDAC vs Mixed	56	36	20	26-82			Histology	No	UICC Stage II n=18, STAGE III n=22, Stage III n=16	No		22	11	11	43-87	68			11	Chronic pancreatitis	6	5	55-80	62
#1490	PMID: 31941049	Potential of exosomal microRNA-200b as liquid biopsy marker in pancreatic ductal adenocarcinoma	Sameer A. Dhayat	sameer.dhayat@ukmuenster.de	Germany	Recieved no external funding	None Declared	Yes	Prospective	Serum exosomes	Before Surgery	2015	2018	PDAC	Yes	1	CA19-9	CA19-9	Single marker	Yes	PDAC vs Mixed	56	36	20	26-82			Histology	No	UICC Stage II n=18, STAGE III n=22, Stage III n=16	No		22	11	11	43-87	68			11	Chronic pancreatitis	6	5	55-80	62
[truncated: 1,425 more rows]
[truncated: 22 more columns]
